# Supplementary material
Source: HighWire-hosted journal article supplement (doi:10.1101/rna.078410.120)
Supplement: Supplemental_File_4_count_matrix.xlsx [file Supplemental_File_4_count_matrix.xlsx]

## Sheet: Data
#miRNA		Tag	read_count	precursor	total	Rank	ACA	Rank	AMU	Rank	ALI	Rank	HS1	Rank	HS2		total aRNA samples		BLO	BM1	BM2	BM3	BM4	BM5	BR1	BR2	BR3	BR4	BR5	CER	CO1	CO2	CO3	CO4	CO5	COR	DU1	DU2	DU3	DU4	DU5	HE1	HE2	HE3	HE4	HE5	HEA	HYP	IL1
cfa-Mir-339-5p	MATURE	polymorphic	233305	cfa-Mir-339	233305	13	0	16	0	7	8	45	21	18	142		171		86171	54	42	41	58	74	69	221	132	73	71	1199	965	92	178	375	1073	8218	144	680	93	69	114	1001	62	288	40	207	6530	2603	1408
cfa-Mir-193-P1b-3p	MATURE	polymorphic	46951	cfa-Mir-193-P1b	46951	7	1	16	0	37	0	50	18	22	122		141		69	5	5	3	4	10	25	128	39	156	73	110	300	26	24	69	100	1263	44	117	123	271	213	688	58	238	75	241	330	208	244
cfa-Mir-8-P3a-3p	MATURE	polymorphic	97584	cfa-Mir-8-P3a	97584	13	0	16	0	37	0	132	2	117	8		10		2	0	0	0	0	0	4	4360	2	6	287	19	3332	307	854	16	5208	6484	231	1540	410	15	244	6	1	8	1	2	4	2612	2410
cfa-Mir-10-P2b-3pS	STAR	polymorphic	13788	cfa-Mir-10-P2b	13788	13	0	16	0	37	0	132	2	219	1		3		0	0	0	0	0	2	118	545	469	265	202	1026	145	24	17	19	81	5781	3	34	39	44	16	208	11	66	7	28	83	729	157
cfa-Mir-769-3pS	STAR	polymorphic	3251	cfa-Mir-769	3251	13	0	16	0	37	0	132	2	277	0		2		52	1	0	1	0	0	44	156	120	40	34	304	1	0	2	1	3	2103	1	3	1	0	1	19	0	11	1	3	7	185	8
cfa-Mir-181-P1b-3pS	STAR	polymorphic	129960	cfa-Mir-181-P1b	129960	13	0	16	0	37	0	171	1	152	4		5		383	19	12	10	9	15	723.5	3140	1458	1250	5825	4538	883	130	133	1222.5	563.5	29283	35	220	282.5	403.5	125.5	10262	684.5	1639.5	540	1664	914	12215	1083.5
cfa-Mir-15-P2c-3pS	STAR	polymorphic	5086	cfa-Mir-15-P2c	5086	13	0	16	0	37	0	171	1	219	1		2		0	4	0	0	2	1	27	78	153	27	41	435	67	6	6	31	56	991	5	19	25	17	12	225	5	44	6	24	87	214	50
cfa-Mir-224-3pS	STAR	polymorphic	10715	cfa-Mir-224	10715	13	0	16	0	37	0	242	0	129	7		7		0	1	2	4	4	3	77	416	105	59	41	353	252	24	59	26	255	1003	29	82	54	58	37	310	19	82	11	90	35	715	414
cfa-Mir-28-P2-5p	MATURE	polymorphic	833975	cfa-Mir-28-P2	833975	13	0	16	0	37	0	242	0	152	4		4		79	165	309	169	215	259	5022	19439	8741	11226	13109	54039	11850	913	1888	6015	6921	301320	719	3891	2476	2439	2087	25247	1324	5345	1162	4606	1472	84010	11055
cfa-Mir-154-P2-v1-3p	MATURE	polymorphic	10188	cfa-Mir-154-P2-v1	10188	13	0	16	0	37	0	242	0	177	2		2		0	0	0	0	0	0	76	256	136	120	52	778	16	10	2	3	21	6367	1	0	12	2	5	32	0	10	0	4	34	1024	6
cfa-Mir-105-P2-5p	MATURE	polymorphic	7175	cfa-Mir-105-P2	7175	13	0	16	0	37	0	242	0	219	1		1		0	0	1	0	0	0	126	495	42	223	303	148	7	1	0	4	8	4457	0	2	1	5	2	27	1	7	5	12	6	968	6
cfa-Mir-8859-P2-5p	MATURE	NOT IN HUMAN, canid-specifc	27410	cfa-Mir-8859-P2	27410	13	0	3	2	37	0	132	2	73	17		21		5444	8	14	16	15	13	40	172	47	132	170	294	251	26	48	76	295	2720	18	144	24	20	30	105	29	83	32	93	831	1219	291
cfa-Mir-8859-P2-3pS	STAR	NOT IN HUMAN, canid-specifc	4486	cfa-Mir-8859-P2	4486	13	0	10	1	37	0	171	1	219	1		3		114	1	0	2	1	1	13	72	11	17	38	67	21	3	8	22	45	1643	0	9	6	3	1	55	4	26	5	29	40	278	30
cfa-Mir-1838-5p	MATURE	NOT IN HUMAN, canid-specifc	7483	cfa-Mir-1838	7483	13	0	16	0	16	1	242	0	177	2		3		676	1	5	4	4	2	27	117	23	82	72	332	42	4	4	32	32	3192	3	12	12	5	22	41	6	28	3	14	75	732	51
cfa-Mir-8859-P1-5pS	STAR	NOT IN HUMAN, canid-specifc	104	cfa-Mir-8859-P1	104	13	0	16	0	16	1	242	0	277	0		1		1	0	0	0	0	0	0	0	0	0	0	3	3	0	1	0	3	4	0	0	0	0	2	0	0	2	1	1	0	3	1
cfa-Mir-8859-P1-3p	MATURE	NOT IN HUMAN, canid-specifc	10954	cfa-Mir-8859-P1	10954	13	0	16	0	37	0	26	34	30	86		120		26	9	8	5	13	11	3	14	7	9	18	65	66	13	7	12	130	353	26	84	37	13	32	30	0	12	5	12	301	145	62
cfa-Mir-1840-3p	MATURE	NOT IN HUMAN, canid-specifc	1226	cfa-Mir-1840	1226	13	0	16	0	37	0	171	1	277	0		1		1028	0	0	0	1	0	0	2	1	0	0	5	0	0	1	3	2	23	0	0	0	0	1	0	0	0	0	0	3	5	1
cfa-Novel-6-3pS	STAR	NOT IN HUMAN, canid-specifc	48	cfa-Novel-6	48	13	0	16	0	37	0	171	1	277	0		1		2	0	0	0	0	0	1	2	0	0	0	1	0	0	0	0	0	10	2	1	0	0	0	0	0	0	0	0	1	5	1
cfa-Novel-23-3p	MATURE	NOT IN HUMAN, canid-specifc	2506	cfa-Novel-23	2506	13	0	16	0	37	0	242	0	177	2		2		16	0	0	0	1	1	8	18	13	10	8	31	19	4	3	12	25	174	5	8	4	2	1	16	0	3	1	2	50	46	18
cfa-Novel-12-3p	MATURE	NOT IN HUMAN, canid-specifc	128	cfa-Novel-12	128	13	0	16	0	37	0	242	0	219	1		1		6	0	0	0	0	0	0	0	0	0	0	1	0	0	0	0	1	3	0	0	0	0	0	0	0	0	0	0	8	3	0
cfa-Mir-154-P33-5pS	STAR	NOT IN HUMAN	1145	cfa-Mir-154-P33	1145	13	0	16	0	16	1	242	0	277	0		1		0	0	0	0	0	0	16	22	12	20	7	43	2	0	0	0	0	855	0	0	0	0	0	0	0	0	0	0	0	158	0
cfa-Mir-1842-v1-3pS	STAR	NOT IN HUMAN	648.333	cfa-Mir-1842-v1	648.333	13	0	16	0	35	0.5	242	0	277	0		0.5		9	2	1	1	1	2	2	8	8.5	5	3.5	46	13.5	2	1	6.5	18.5	274	1	6	0	0.5	0.5	2.5	0	1.5	0	1.5	2	44.5	19.5
cfa-Mir-1388-5p	MATURE	NOT IN HUMAN	318277	cfa-Mir-1388	318277	13	0	16	0	37	0	48	19	43	51		70		11495	1325	500	1399	915	700	930	3035	4969	1054	2424	12727	5494	272	1214	2586	3781	29831	641	2194	612	404	668	13221	896	3770	1043	2831	6878	9386	8258
cfa-Mir-154-P34-3p	MATURE	NOT IN HUMAN	35964	cfa-Mir-154-P34	35964	13	0	16	0	37	0	171	1	277	0		1		0	2	0	0	0	0	481	1631	1310	739	662	3140	140	28	40	19	156	19300	2	2	62	31	40	169	4	72	12	40	33	5342	76
cfa-Mir-1842-v1-5p	MATURE	NOT IN HUMAN	3876	cfa-Mir-1842-v1	3876	13	0	16	0	37	0	171	1	277	0		1		100	1	4	3	2	2	11	64	76	26	12	292	26	2	7	13	38	1548	6	18	2	2	6	32	1	10	1	2	62	366	46
cfa-Mir-7180-3p	MATURE	NOT IN HUMAN	6948	cfa-Mir-7180	6948	13	0	16	0	37	0	171	1	277	0		1		26	0	1	1	1	0	61	153	206	65	126	666	18	0	5	28	26	3937	0	4	1	1	0	68	2	28	4	15	7	864	46
cfa-Mir-2387-5p	MATURE	NOT IN HUMAN	3664	cfa-Mir-2387	3664	13	0	16	0	37	0	242	0	164	3		3		10	0	0	0	1	0	1	4	4	6	3	29	0	1	0	0	4	63	1	0	0	0	0	0	0	1	0	0	138	29	0
cfa-Mir-205-P1-5p	MATURE		214299	cfa-Mir-205-P1	214299	1	7	16	0	37	0	4	243	1	2012		2262		46	0	0	0	0	0	3	29	2	4	1	2	1	0	15	0	0	74	0	3	28	1	1	2	0	1	0	3	13	78	0
cfa-Mir-423-5pS	STAR		403787	cfa-Mir-423	403787	2	4	16	0	37	0	22	40	35	68		112		88424	59	46	46	59	59	962	3512	3301	1172	2147	3210	3133	234	797	4147	3852	10221	203	1483	752	727	618	9876	434	2191	450	1591	4518	8522	2774
cfa-Mir-423-3p	MATURE		502417	cfa-Mir-423	502417	3	2	16	0	8	6	12	141	11	285		434		172914	38	25	51	41	41	952	3115	3179	889	1885	13478	3106	212	641	2534	2856	71552	158	1487	364	335	297	6077	299	1689	278	1000	3055	20616	3318
cfa-Mir-26-P2-5p	MATURE		5862113	cfa-Mir-26-P2	5862113	3	2	16	0	16	1	37	24	8	329		356		2880	11382	23478	13013	11255	17650	22016	84796	148941	35471	49118	471470	60565	8084	12401	24770	60075	1106209	10276	50988	20454	21628	26720	146422	7455	39666	6056	29626	154906	309330	57874
cfa-Mir-26-P3-5p	MATURE		5857684	cfa-Mir-26-P3	5857684	3	2	16	0	16	1	37	24	9	328		355		2870	11380	23478	13013	11253	17648	22008	84758	148917	35461	49095	471381	60551	8082	12396	24765	60056	1105612	10272	50980	20451	21626	26717	146285	7441	39629	6050	29585	154419	309182	57843
cfa-Let-7-P2b2-5p	MATURE		854296	cfa-Let-7-P2b2	854296	3	2	16	0	37	0	11	158	16	189		349		15422	217	322	268	272	279	3607	17760	16427	13089	13816	34557	7917	1505	1219	2768	14829	156132	2600	10864	2911	3672	5049	20214	1015	5036	2442	3981	19568	18068	8025
cfa-Mir-155-5p	MATURE		124896	cfa-Mir-155	124896	7	1	1	17	37	0	73	7	66	20		45		230	215	187	128	235	180	64	483	84	225	179	189	5843	860	1323	14818	12562	2398	224	1502	258	319	578	527	27	97	37	90	563	725	18021
cfa-Mir-148-P1-3p	MATURE		7312449	cfa-Mir-148-P1	7312449	7	1	16	0	1	51	6	196	13	252		500		4520	1440	968	1114	1246	1236	2930	12854	4299	3848	3576	22539	78230	8890	16320	16980	80151	69880	13686	49030	7118	8850	18534	19885	901	8061	584	3238	40549	57694	95047
cfa-Mir-1-P3-3p	MATURE		10772	cfa-Mir-1-P3	10772	7	1	16	0	37	0	16	67	277	0		68		7	1	0	0	1	1	0	3	21	0	4	109	0	0	0	0	0	36	0	0	0	0	0	8	0	2	0	0	2778	2	0
cfa-Mir-140-v1-5pS	STAR		17256	cfa-Mir-140-v1	17256	11	0.5	16	0	37	0	228	0.5	277	0		1		9.5	8	8.5	4.5	9.5	5.5	9.5	31.5	25.5	17.5	15.5	251	56	7	9	21.5	68	936.5	8	37.5	7.5	6	8	79	4	17.5	1.5	11	1748	237.5	96.5
cfa-Mir-140-v2-5pS	STAR		17256	cfa-Mir-140-v2	17256	11	0.5	16	0	37	0	228	0.5	277	0		1		9.5	8	8.5	4.5	9.5	5.5	9.5	31.5	25.5	17.5	15.5	251	56	7	9	21.5	68	936.5	8	37.5	7.5	6	8	79	4	17.5	1.5	11	1748	237.5	96.5
cfa-Mir-22-P1a-3p	MATURE		9013958	cfa-Mir-22-P1a	9013958	13	0	2	3	37	0	7	182	37	64		249		1735	2171	1777	1491	1766	2287	33234	114881	32539	49679	31950	153578	91908	9745	17541	32553	95706	1967579	9608	59719	17542	15224	15295	687801	39501	150258	20058	152884	29362	311070	88316
cfa-Mir-378-3p	MATURE		5100577	cfa-Mir-378	5100577	13	0	3	2	2	18	3	293	7	363		676		728	364	663	370	502	680	2652	12821	6596	4318	3651	18400	133292	16116	20546	7245	110654	104797	15463	62257	17842	25111	18980	489979	36725	126858	28425	105129	602370	13723	54490
cfa-Mir-122-5p	MATURE		665388	cfa-Mir-122	665388	13	0	3	2	5	9	171	1	277	0		12		33	0	0	2	0	1	0	4	0	2	2	25	15	0	2	3	3	12	1	3	12	5	0	35	0	7	4	4	39	17	12
cfa-Mir-10-P3b-5p	MATURE		1611013	cfa-Mir-10-P3b	1611013	13	0	3	2	37	0	171	1	52	41		44		179	61	114	91	85	76	9972	30444	35543	23855	23836	354229	6603	649	744	1945	3760	449324	572	1616	3456	3076	1690	24269	1785	4633	1579	5674	17599	206663	4837
cfa-Let-7-P2c1-3pS	STAR		4783	cfa-Let-7-P2c1	4783	13	0	3	2	37	0	242	0	219	1		3		1074	3	7	6	2	3	14	67	45	55	38	177	51	7	8	60	77	1014	2	52	7	9	16	25	0	9	1	3	16	75	85
cfa-Mir-143-3p	MATURE		19194866	cfa-Mir-143	19194866	13	0	10	1	8	6	19	49	25	96		152		161	2684	4040	2234	2723	3823	50863	176583	27322	45559	54252	96825	2218377	283995	297400	87048	560245	834279	56248	267513	824045	513792	198190	1054182	49137	160877	59163	150308	244235	203917	1525583
cfa-Mir-486-5p	MATURE		29088486	cfa-Mir-486	29088486	13	0	10	1	8	6	60	13	94	11		31		13690036	33444	38211	44414	25613	32580	40881	97603	139076	31791	75850	316353	25119	2252	3101	8412	14815	537350	1269	4635	68388	245659	77994	1441883	96058	349393	432407	313089	45749	148389	19183
cfa-Mir-24-P1-3p	MATURE		267677	cfa-Mir-24-P1&2	267677	13	0	3	2	37	0	8	164	6	596		762		114	83	84	86	90	106	267	824	268	659	1005	2966	2378	342	310	418	1960	12375	460	1625	821	630	848	4440	244	1014	336	876	35856	3808	2255
cfa-Mir-193-P1a-5p	MATURE		13252	cfa-Mir-193-P1a	13252	13	0	10	1	37	0	37	24	77	15		40		406	0	7	3	6	4	29	100	21	47	66	128	105	12	20	20	164	665	2	9	60	150	158	311	30	53	78	100	911	114	38
cfa-Mir-133-P12-v12-3p	MATURE		1144704	cfa-Mir-133-P12-v12	1144704	13	0	3	2	37	0	31	30	177	2		34		40	6	10	10	2	32	104	434	112	172	62	1060	3066	328	344	40	380	4300	90	324	692	378	88	244404	16688	66920	11276	66600	99790	1412	962
cfa-Mir-486-3pS	STAR		27196.4	cfa-Mir-486	27196.4	13	0	10	1	37	0	171	1	177	2		4		0	5	9	6	7	10	26	66	295	22	28	394	10	0	1	5	8	832	2	8	37	50	33	705	46	540	69	377	1150	89	16
cfa-Mir-154-P16-5pS	STAR		6693	cfa-Mir-154-P16	6693	13	0	10	1	37	0	242	0	277	0		1		0	0	0	0	0	0	110	507	82	171	205	180	1	0	2	0	1	4979	0	0	0	0	1	10	0	2	2	0	1	341	2
cfa-Mir-27-P2-3p	MATURE		6668746	cfa-Mir-27-P2	6668746	13	0	16	0	3	14	10	160	3	966		1140		990	3288	3362	2340	3398	3107	21440	72531	31584	32932	76708	166209	188168	15393	29350	20728	104797	1292404	9822	49306	43312	29625	23802	455560	23414	74636	16734	80846	243528	375700	140042
cfa-Mir-574-5pS	STAR		12856.3	cfa-Mir-574	12856.3	13	0	16	0	4	12	73	7	107	10		29		113	12	11	8	12	16	10	85	5	42	26	21	156	28	37	180	495	286	61	288	100	47	97	149	8	43	16	29	405	103	189
cfa-Mir-21-5p	MATURE		6039012	cfa-Mir-21	6039012	13	0	16	0	5	9	45	21	45	50		80		447	2926	4186	3124	5177	4156	2766	9233	6581	3903	3720	37228	183182	19743	42284	105131	303538	171858	19124	142176	8222	2113	10106	15819	705	4695	416	2373	79672	40603	335980
cfa-Mir-192-P1-5p	MATURE		12114516	cfa-Mir-192-P1	12114516	13	0	16	0	11	4	65	8	75	16		28		1547	315	439	591	438	398	2616	8669	51473	4256	7205	174738	838316	74659	187399	11361	965981	119964	129867	1321330	34672	7239	84553	6884	614	2643	790	1414	2632	27200	1019176
cfa-Mir-30-P1a-5p	MATURE		8438451	cfa-Mir-30-P1a	8438451	13	0	16	0	12	3	22	40	17	154		197		96	3282	6194	4132	4072	5404	26082	77728	36502	32256	42066	162172	46729	5816	7217	15474	33117	924196	6756	31162	24320	26954	25640	441782	24934	91136	16681	74574	440187	203378	67003
cfa-Mir-27-P1-3p	MATURE		467297	cfa-Mir-27-P1	467297	13	0	16	0	13	2	8	164	2	1134		1300		243	447	496	371	510	463	304	1240	301	420	344	1688	9110	1072	1616	2664	6088	11406	638	3556	1502	561	1125	15352	940	3554	552	3870	29050	3207	9404
cfa-Mir-10-P2a-5p	MATURE		1290128	cfa-Mir-10-P2a	1290128	13	0	16	0	13	2	14	82	14	246		330		1814	52	86	57	72	88	1152	3174	1954	2014	2844	12919	942	117	144	428	505	24615	46	110	626	856	474	7976	508	2484	815	2015	141514	21853	746
cfa-Mir-10-P2c-5p	MATURE		1290128	cfa-Mir-10-P2c	1290128	13	0	16	0	13	2	14	82	14	246		330		1814	52	86	57	72	88	1152	3174	1954	2014	2844	12919	942	117	144	428	505	24615	46	110	626	856	474	7976	508	2484	815	2015	141514	21853	746
cfa-Mir-148-P2-3p	MATURE		215657	cfa-Mir-148-P2	215657	13	0	16	0	16	1	21	41	53	39		81		14	13	47	36	39	38	11	65	18	58	12	125	248	66	43	22	380	368	237	824	62	42	290	143	5	73	2	29	19226	129	402
cfa-Mir-221-P1-3p	MATURE		225009	cfa-Mir-221-P1	225009	13	0	16	0	16	1	41	23	49	43		67		294	463	477	379	643	498	1551	7470	2191	5660	2258	9347	4077	738	804	1741	11008	65383	395	3106	497	372	521	1318	65	686	65	176	1090	3733	4417
cfa-Mir-1307-5p	MATURE		178409	cfa-Mir-1307	178409	13	0	16	0	16	1	57	15	75	16		32		17	88	52	58	79	80	250	753	642	177	222	14571	1744	132	328	174	2365	96393	371	1542	35	16	87	1535	95	884	26	284	522	12667	2867
cfa-Mir-148-P1-5pS	STAR		74911	cfa-Mir-148-P1	74911	13	0	16	0	16	1	89	5	117	8		14		167	38	36	44	52	40	83	435	98	109	141	552	1249	140	196	463	1539	1975	160	538	168	188	528	603	27	183	34	82	171	871	1765
cfa-Mir-126-v2-3p	MATURE		705532	cfa-Mir-126-v2	705532	13	0	16	0	16	1	132	2	89	12		15		56	171	269	103	156	208	349	1402	444	741	359	3368	1188	191	253	674	1491	26361	286	1310	289	529	621	10837	531	1749	273	1657	127114	4547	1623
cfa-Mir-126-v3-3p	MATURE		705535	cfa-Mir-126-v3	705535	13	0	16	0	16	1	132	2	89	12		15		56	171	269	103	156	208	349	1402	444	741	359	3368	1188	191	253	674	1491	26362	286	1310	289	529	621	10837	531	1749	273	1657	127114	4547	1623
cfa-Mir-126-v1-3pS	STAR		705517	cfa-Mir-126-v1	705517	13	0	16	0	16	1	132	2	93	11.6667		14.6667		55.6667	170.667	268.667	102.667	156.333	208	349.333	1401.67	444	740.667	358.667	3368	1188	191.333	252.667	673.667	1490.67	26361	285.667	1310	289	528.667	621	10836.7	531	1749.33	273	1657	127112	4547.33	1623.33
cfa-Mir-30-P2c-5p	MATURE		635720	cfa-Mir-30-P2c	635720	13	0	16	0	16	1	171	1	62	29		31		556	14	17	18	23	21	1245	3983	2623	1541	685	12826	4033	561	814	1290	5623	142015	512	2734	550	330	659	35765	2578	7864	1417	7553	49342	11815	5109
cfa-Mir-148-P2-5pS	STAR		2550	cfa-Mir-148-P2	2550	13	0	16	0	16	1	171	1	277	0		2		1	3	3	1	4	0	8	40	16	3	5	61	72	6	11	6	45	214	10	47	6	4	14	83	2	21	4	15	44	51	70
cfa-Mir-142-v4-5p	MATURE		406887	cfa-Mir-142-v4	406887	13	0	16	0	16	1	242	0	177	2		3		3617	1908	1713	1509	1724	1665	223	589	180	229	158	2083	21038	1642	3581	20186	21889	8794	1806	15744	421	276	1096	2588	86	904	37	409	1321	3411	40125
cfa-Mir-188-P2-3pS	STAR		8927	cfa-Mir-188-P2	8927	13	0	16	0	16	1	242	0	219	1		2		1511	0	8	1	5	6	13	58	16	55	21	59	42	7	6	58	67	696	7	25	9	1	19	40	0	14	1	12	59	131	77
cfa-Let-7-P2a3-3pS	STAR		229.167	cfa-Let-7-P2a3	229.167	13	0	16	0	16	1	242	0	277	0		1		1	0	0	0	1	1	0	1	1	1	0	12.3333	1	1	0	0	4	51	2	2	0	0	0	1	0	2	0	2	6	8	3
cfa-Let-7-P2b1-3pS	STAR		312	cfa-Let-7-P2b1	312	13	0	16	0	16	1	242	0	277	0		1		7	3	0	0	1	2	1	1	0	1	0	7	3	1	0	2	7	84	0	10	1	0	1	6	0	0	0	2	6	16	8
cfa-Mir-451-5p	MATURE		2450351	cfa-Mir-451	2450351	13	0	16	0	16	1	242	0	277	0		1		840401	8787	7393	9387	5834	8528	1712	4557	864	1302	363	7640	2124	553	298	333	2575	46804	615	3042	2846	2563	5600	17388	638	11831	230	2837	79378	13194	2585
cfa-Mir-1842-v2-3pS	STAR		648.833	cfa-Mir-1842-v2	648.833	13	0	16	0	35	0.5	242	0	277	0		0.5		9	2	1	1	1	2	2	8	8.5	5	3.5	46	13.5	2	1	6.5	18.5	274	1	6	0	0.5	0.5	2.5	0	1.5	0	1.5	2	44.5	19.5
cfa-Mir-203-v1-3p	MATURE		52385	cfa-Mir-203-v1	52385	13	0	16	0	37	0	1	372	4	730		1102		2	1	1	0	1	2	72	178	10	100	46	122	1092	148	261	8	2378	4162	192	2256	20	10	135	8	0	4	0	2	44	136	1118
cfa-Mir-203-v2-3p	MATURE		52127	cfa-Mir-203-v2	52127	13	0	16	0	37	0	2	369	5	728		1097		2	1	1	0	1	2	72	178	10	100	46	121	1085	148	261	8	2373	4122	190	2238	20	10	135	8	0	4	0	2	44	135	1111
cfa-Mir-146-P2-5p	MATURE		263242	cfa-Mir-146-P2	263242	13	0	16	0	37	0	5	229	10	288		517		12	44	65	53	40	58	3748	7634	434	10396	4088	3438	4004	306	602	274	5062	92769	119	574	373	422	600	752	1	234	32	18	418	3809	5780
cfa-Mir-10-P1b-v1-5p	MATURE		22406062	cfa-Mir-10-P1b-v1	22406062	13	0	16	0	37	0	13	91	32	72		163		212	35032	75732	55050	60264	70628	1414	5758	1696	3678	6187	28235	402612	47599	50694	151544	350447	13782	16062	47269	68088	215567	184410	749932	32886	66965	130880	60215	64040	16826	468564
cfa-Mir-29-P1a-3p	MATURE		690622	cfa-Mir-29-P1a	690622	13	0	16	0	37	0	17	53	27	91		144		1012	116	123	108	177	183	1933	9037	5518	3381	2478	36194	5110	669	1195	5713	8218	158328	1106	5594	795	354	1114	5452	245	1685	137	1065	20286	37522	10108
cfa-Let-7-P2c3-5p	MATURE		1707545	cfa-Let-7-P2c3	1707545	13	0	16	0	37	0	17	53	34	69		122		759	175	191	215	174	180	4145	15379	19360	8295	8402	63576	23852	3044	3526	11251	27473	200345	2031	15159	3118	3040	3273	26286	1309	8811	1886	5666	110402	40625	27498
cfa-Mir-23-P1-3p	MATURE		489309	cfa-Mir-23-P1	489309	13	0	16	0	37	0	20	48	12	262		310		2992	166	230	203	263	232	250	874	225	604	358	1090	8878	1138	1449	1740	7180	6440	918	4236	2374	1916	1603	8214	770	4778	1178	3988	22488	1841	9402
cfa-Mir-375-3p	MATURE		2096467	cfa-Mir-375	2096467	13	0	16	0	37	0	24	39	137	6		45		8	3	2	0	1	4	64	509	104	50	256	313	31396	2287	8575	388	56344	2200	2878	9463	15821	355	8661	25	27	7	31	171	7	403179	22030
cfa-Mir-146-P1-5p	MATURE		339891	cfa-Mir-146-P1	339891	13	0	16	0	37	0	25	36	57	30		66		342	827	1176	943	1772	1704	484	1314	304	1614	2021	2280	24694	3061	4006	9280	42834	10926	2095	13288	2134	898	3174	1873	28	209	213	94	3324	5772	40324
cfa-Mir-186-5p	MATURE		2552714	cfa-Mir-186	2552714	13	0	16	0	37	0	27	32	24	113		145		7452	4193	3573	3591	3715	3592	10601	29862	39321	13047	15760	120634	58503	5482	11566	52813	80610	453138	7730	38131	8040	5719	9538	68857	3491	20712	2800	12520	12372	111186	106985
cfa-Let-7-P1a-5p	MATURE		1472035	cfa-Let-7-P1a	1472035	13	0	16	0	37	0	27	32	68	19		51		1363	1303	1260	1118	1215	1204	8266	35873	37259	18025	29295	73931	23323	3555	3716	11436	37623	299044	3153	19719	5378	6521	7109	42056	1970	12312	3068	8645	14189	35932	29738
cfa-Let-7-P2a1-5p	MATURE		1471292	cfa-Let-7-P2a1	1471292	13	0	16	0	37	0	27	32	68	19		51		1370	1313	1259	1120	1227	1209	8258	35864	37136	18026	29279	73720	23280	3540	3704	11411	37551	298909	3160	19715	5382	6515	7111	42159	1971	12342	3070	8682	14219	35907	29706
cfa-Let-7-P2a2-5p	MATURE		1467331	cfa-Let-7-P2a2	1467331	13	0	16	0	37	0	27	32	68	19		51		1362	1300	1255	1114	1213	1203	8245	35785	37092	17988	29212	73629	23241	3539	3699	11378	37497	298267	3146	19679	5370	6505	7096	41925	1964	12283	3062	8636	14148	35811	29642
cfa-Mir-23-P2-3p	MATURE		318316	cfa-Mir-23-P2	318316	13	0	16	0	37	0	32	28	38	63		91		666	128	168	123	131	194	752	2917	1185	2164	2780	4732	11624	1614	1634	600	8462	33192	1234	5365	3656	3558	2429	8044	707	4466	946	3272	15150	7611	10558
cfa-Let-7-P2a3-5p	MATURE		2589885	cfa-Let-7-P2a3	2589885	13	0	16	0	37	0	33	27	54	36		63		328	1516	1472	1349	1590	1465	12500	40926	51874	20069	31642	78906	56343	5943	9719	37146	52022	415730	4403	26566	8513	7746	7568	65353	3455	19416	4049	13901	55454	68180	77683
cfa-Mir-92-P1a-3p	MATURE		971157	cfa-Mir-92-P1a	971157	13	0	16	0	37	0	34	26	19	124		150		268501	330	252	343	323	322	1168	7433	2197	2955	8268	7163	13970	1724	3443	17998	23080	61754	1844	8826	1964	2514	2299	17095	869	5338	899	3514	1095	16597	21062
cfa-Mir-92-P1b-3p	MATURE		971162	cfa-Mir-92-P1b	971162	13	0	16	0	37	0	34	26	19	124		150		268503	330	252	343	323	322	1168	7433	2197	2955	8268	7163	13970	1724	3443	17999	23080	61754	1844	8826	1964	2514	2299	17095	869	5338	899	3514	1095	16597	21062
cfa-Let-7-P2b1-5p	MATURE		2494026	cfa-Let-7-P2b1	2494026	13	0	16	0	37	0	34	26	55	35		61		323	1448	1391	1273	1512	1394	12222	40163	50900	19762	31002	77171	54319	5775	9334	35735	50627	406028	4268	25876	8237	7506	7304	61483	3227	18266	3787	13070	52643	65835	74923
cfa-Mir-10-P1a-v1-5p	MATURE		7690253	cfa-Mir-10-P1a-v1	7690253	13	0	16	0	37	0	37	24	68	19		43		343	11409	17048	13591	13566	13494	234	1644	372	599	1538	8591	370106	28679	48051	53772	245550	6047	13672	39924	21018	68913	59592	190706	1276	11748	14535	7228	18014	6344	432900
cfa-Mir-145-5p	MATURE		743629	cfa-Mir-145	743629	13	0	16	0	37	0	42	22	25	96		118		25	28	49	33	35	42	531	1174	328	886	332	908	20880	2738	2964	901	13627	11874	1824	3774	16477	6201	3946	9305	597	3331	872	1897	27347	1442	18112
cfa-Mir-154-P9-3p	MATURE		337562	cfa-Mir-154-P9	337562	13	0	16	0	37	0	42	22	111	9		31		9	3	1	1	3	2	2725	10419	10816	3973	3776	36066	2080	322	477	199	1284	190620	14	24	1618	524	547	2466	76	1040	105	422	1058	21108	1096
cfa-Mir-127-3p	MATURE		2086761	cfa-Mir-127	2086761	13	0	16	0	37	0	42	22	137	6		28		4	7	11	5	7	7	36822	163837	81152	86977	114413	202713	6396	1278	1656	1007	8002	815554	105	244	6905	4296	2454	10684	292	3595	601	1509	822	392931	2905
cfa-Mir-30-P1b-5p	MATURE		2169938	cfa-Mir-30-P1b	2169938	13	0	16	0	37	0	47	20	48	46		66		471	1489	1274	1282	1400	1082	6978	16798	19884	7374	7214	121508	29898	3054	6408	9190	34980	437073	3327	21088	2694	1513	2288	111004	4714	29594	2728	14171	112088	94753	42986
cfa-Mir-30-P1c-5p	MATURE		4974025	cfa-Mir-30-P1c	4974025	13	0	16	0	37	0	48	19	19	124		143		4792	1346	1457	1353	1766	1490	25190	78212	44694	33403	32430	144524	41557	3706	8770	15168	47397	1034356	2880	15120	6630	5128	5598	466660	19310	74774	17852	56192	468448	156774	41527
cfa-Mir-181-P1a-5p	MATURE		9314288	cfa-Mir-181-P1a	9314288	13	0	16	0	37	0	50	18	28	90		108		4238	3240	2540	2738	3476	3350	63136	297407	181662	163346	448223	479895	70127	6060	10340	71926	56849	3509150	3522	25766	13422	20390	14930	124968	7119	24951	10034	22990	10264	881883	78894
cfa-Mir-181-P1b-5p	MATURE		9314262	cfa-Mir-181-P1b	9314262	13	0	16	0	37	0	50	18	28	90		108		4238	3240	2540	2740	3476	3350	63136	297407	181662	163345	448223	479894	70127	6060	10340	71924	56849	3509142	3522	25766	13422	20390	14930	124968	7119	24951	10034	22990	10264	881881	78894
cfa-Mir-1-P1-3p	MATURE		5700485	cfa-Mir-1-P1	5700485	13	0	16	0	37	0	50	18	277	0		18		291	0	0	1	0	0	2	15	1	6	6	118	156	22	8	0	23	314	4	26	24	14	4	18732	1368	2557	1130	3160	5514759	74	70
cfa-Mir-1-P2-3p	MATURE		5700485	cfa-Mir-1-P2	5700485	13	0	16	0	37	0	50	18	277	0		18		291	0	0	1	0	0	2	15	1	6	6	118	156	22	8	0	23	314	4	26	24	14	4	18732	1368	2557	1130	3160	5514759	74	70
cfa-Mir-28-P2-3p	MATURE		1147095	cfa-Mir-28-P2	1147095	13	0	16	0	37	0	55	17	43	51		68		2514	374	541	319	504	507	12275	48786	16692	26267	54940	26695	18369	2415	3818	14935	25942	262024	1922	12412	7595	10372	6701	36692	1848	8426	2633	6006	3362	63271	23299
cfa-Mir-340-5p	MATURE		399073	cfa-Mir-340	399073	13	0	16	0	37	0	56	16	137	6		22		82	250	192	172	318	185	1692	5279	3683	2356	2015	19147	2393	445	565	2119	3518	147394	376	2496	187	122	284	2356	141	996	67	483	14977	15306	6246
cfa-Mir-8-P2b-3p	MATURE		268398	cfa-Mir-8-P2b	268398	13	0	16	0	37	0	58	14	22	122		136		106	1	0	1	1	2	0	187	0	3	32	0	3236	435	784	26	6358	106	820	3798	720	27	740	5	3	4	3	10	34	1375	2628
cfa-Mir-154-P7-5p	MATURE		18339	cfa-Mir-154-P7	18339	13	0	16	0	37	0	58	14	219	1		15		0	1	1	1	0	0	47	160	49	142	84	473	25	5	5	3	40	3900	0	0	18	23	19	76	0	9	4	6	555	709	9
cfa-Mir-10-P2b-5p	MATURE		810337	cfa-Mir-10-P2b	810337	13	0	16	0	37	0	61	12	46	48		60		42	124	264	168	175	247	5927	17380	18820	12528	16197	187752	4843	551	585	1932	2797	115348	301	953	3116	3535	1643	13331	1089	2927	2098	3224	7434	121018	5507
cfa-Mir-92-P2c-3p	MATURE		655459	cfa-Mir-92-P2c	655459	13	0	16	0	37	0	62	10	42	52		62		41242	1279	1113	1086	1118	1169	1462	7200	3060	3326	5868	8504	12664	1690	2214	12333	15690	46580	1700	7453	2424	2984	2857	11287	439	3484	420	1753	2447	14234	22523
cfa-Mir-96-P2-5p	MATURE		789322	cfa-Mir-96-P2	789322	13	0	16	0	37	0	63	9	50	42		51		27	4	2	2	2	6	253	278960	541	384	31628	9601	14482	1243	3035	2612	15230	88088	798	3689	3967	233	4086	247	10	133	40	52	41	61548	12981
cfa-Mir-8-P1b-3p	MATURE		441745	cfa-Mir-8-P1b	441745	13	0	16	0	37	0	63	9	79	14		23		4	52	48	28	45	28	3	624	9	13	75	32	6370	826	1527	136	9408	788	1606	58535	1288	224	1430	14	6	34	4	44	6	12530	19338
cfa-Mir-191-5p	MATURE		4785093	cfa-Mir-191	4785093	13	0	16	0	37	0	65	8	31	74		82		258287	5251	7643	7308	7454	7544	32309	108823	44496	85733	117914	131190	129217	11672	22518	180032	165559	576884	9208	60363	25277	34238	35967	83254	5111	18374	19173	17190	16634	181487	238017
cfa-Mir-8-P1a-3p	MATURE		713063	cfa-Mir-8-P1a	713063	13	0	16	0	37	0	65	8	36	66		74		30	0	0	0	0	0	1	3183	0	5	190	74	3226	444	789	13	5912	4608	416	2255	764	23	336	8	1	16	4	8	80	2850	2426
cfa-Mir-181-P2b-5p	MATURE		591449	cfa-Mir-181-P2b	591449	13	0	16	0	37	0	65	8	56	31		39		116	240	244	233	297	285	3378	16348	11751	8404	25738	22467	4144	431	646	4337	4081	210777	275	1754	885	1226	688	7691	386	1944	463	1216	1284	74447	5042
cfa-Mir-181-P2a-5p	MATURE		564645	cfa-Mir-181-P2a	564645	13	0	16	0	37	0	65	8	57	30		38		109	220	230	216	258	260	3208	15595	11471	7909	25256	21536	3999	418	610	4189	3845	202065	263	1670	852	1198	662	7442	374	1852	439	1170	1107	72770	4813
cfa-Mir-17-P1c-5p	MATURE		375900	cfa-Mir-17-P1c	375900	13	0	16	0	37	0	65	8	63	21		29		6483	516	403	503	407	365	837	3281	1519	1414	1550	6815	5402	735	1134	4596	8551	49323	543	3629	756	952	784	5590	223	1976	146	819	5695	10003	10950
cfa-Let-7-P1c-5p	MATURE		731057	cfa-Let-7-P1c	731057	13	0	16	0	37	0	65	8	79	14		22		100	520	578	340	467	562	5019	21002	10940	18703	10794	20616	3369	817	555	1992	3552	194160	554	1389	2056	3498	4198	14955	841	7089	2097	4337	9444	26727	3169
cfa-Mir-17-P3a-5p	MATURE		179070	cfa-Mir-17-P3a	179070	13	0	16	0	37	0	65	8	79	14		22		657	51	46	48	51	36	31	132	28	57	81	489	698	124	124	346	1767	2644	145	687	37	34	48	481	26	130	25	99	24008	529	1370
cfa-Mir-210-3p	MATURE		15220	cfa-Mir-210	15220	13	0	16	0	37	0	73	7	57	30		37		36	7	0	4	12	13	17	56	21	29	23	200	65	12	15	64	183	1003	11	57	16	8	15	186	7	57	18	22	406	255	163
cfa-Mir-103-P1-3p	MATURE		435442	cfa-Mir-103-P1	435442	13	0	16	0	37	0	73	7	111	9		16		349	238	226	209	255	218	2810	12652	7060	6554	4364	21021	2792	463	612	3098	4945	115047	488	2393	626	721	663	4000	234	1818	188	785	22295	14736	5312
cfa-Mir-103-P2-3p	MATURE		435442	cfa-Mir-103-P2	435442	13	0	16	0	37	0	73	7	111	9		16		349	238	226	209	255	218	2810	12652	7060	6554	4364	21021	2792	463	612	3098	4945	115047	488	2393	626	721	663	4000	234	1818	188	785	22295	14736	5312
cfa-Mir-185-5p	MATURE		37176	cfa-Mir-185	37176	13	0	16	0	37	0	73	7	111	9		16		1053	5	11	7	12	8	98	277	87	156	125	529	105	14	14	70	169	3427	21	123	14	13	30	106	4	33	17	30	1578	1384	195
cfa-Mir-8-P2a-3p	MATURE		679256	cfa-Mir-8-P2a	679256	13	0	16	0	37	0	79	6	33	70		76		42	0	0	0	0	0	8	3050	5	11	370	28	14423	1330	3648	81	17024	4242	924	3423	2156	61	942	21	5	33	17	22	96	8624	7380
cfa-Mir-140-v1-3p	MATURE		181297	cfa-Mir-140-v1	181297	13	0	16	0	37	0	79	6	39	56		62		14020	104	101	98	135	122	496	2459	1838	794	990	6674	2014	261	296	1180	1542	20677	171	809	492	480	490	3656	216	937	130	602	12710	5238	2370
cfa-Mir-140-v2-3p	MATURE		181298	cfa-Mir-140-v2	181298	13	0	16	0	37	0	79	6	39	56		62		14020	104	101	98	135	122	496	2459	1838	794	990	6674	2014	261	296	1180	1542	20677	171	809	492	480	490	3656	216	937	130	602	12710	5238	2370
cfa-Mir-28-P1-3p	MATURE		395104	cfa-Mir-28-P1	395104	13	0	16	0	37	0	79	6	66	20		26		1181	105	110	97	129	158	839	3784	2876	1315	1699	4911	18359	2817	3745	7342	17706	20632	1258	7953	5796	4559	1657	9410	373	2554	430	1413	1003	4547	17606
cfa-Mir-452-v1-5p	MATURE		52032	cfa-Mir-452-v1	52032	13	0	16	0	37	0	79	6	89	12		18		4	6	8	8	2	4	22	97	71	30	9	308	146	26	34	19	185	926	22	54	26	22	24	172	14	50	14	42	3492	550	330
cfa-Mir-101-P1-v2-3p	MATURE		689012	cfa-Mir-101-P1-v2	689012	13	0	16	0	37	0	79	6	94	11		17		65	223	163	164	229	196	785	2655	5855	1079	1035	32544	4120	645	741	1105	3129	87813	499	2224	342	210	370	7055	349	2093	108	1418	42787	15052	6042
cfa-Mir-101-P2-v2-3p	MATURE		689012	cfa-Mir-101-P2-v2	689012	13	0	16	0	37	0	79	6	94	11		17		65	223	163	164	229	196	785	2655	5855	1079	1035	32544	4120	645	741	1105	3129	87813	499	2224	342	210	370	7055	349	2093	108	1418	42787	15052	6042
cfa-Mir-148-P3-3p	MATURE		261315	cfa-Mir-148-P3	261315	13	0	16	0	37	0	79	6	117	8		14		3180	158	183	243	256	244	313	1358	505	2187	769	2113	1372	269	214	716	2582	11237	612	2980	258	206	1086	875	40	166	43	172	7294	2850	2677
cfa-Mir-103-P3-3p	MATURE		122169	cfa-Mir-103-P3	122169	13	0	16	0	37	0	79	6	152	4		10		8	47	26	42	37	40	1211	4977	2551	2539	1335	7492	471	71	101	449	769	42879	93	628	99	108	100	1183	87	715	54	279	1674	4479	768
cfa-Mir-181-P1c-5p	MATURE		1298996	cfa-Mir-181-P1c	1298996	13	0	16	0	37	0	79	6	152	4		10		5	474	463	385	496	460	6906	28082	117634	11960	18610	369318	11765	895	1707	1929	8805	420265	603	5432	1763	1219	1027	15317	820	4287	528	3138	301	103149	11094
cfa-Mir-221-P2-3p	MATURE		254199	cfa-Mir-221-P2	254199	13	0	16	0	37	0	89	5	41	55		60		61	96	95	82	124	103	2459	9885	3324	3567	4810	9711	3436	383	678	1509	5722	145399	156	754	322	271	229	870	31	413	35	121	267	6059	2675
cfa-Mir-10-P3c-3pS	STAR		156530	cfa-Mir-10-P3c	156530	13	0	16	0	37	0	89	5	68	19		24		8	25	39	28	30	45	1419	5276	3537	2573	3797	9727	858	118	111	304	313	47099	35	90	535	967	430	6309	480	1682	689	1683	1054	14036	494
cfa-Mir-30-P1a-3pS	STAR		185490	cfa-Mir-30-P1a	185490	13	0	16	0	37	0	89	5	73	17		22		1	26	34	28	32	60	618	2134	703	1153.5	1325	1994.5	646	113	86	289	610.5	15653.5	158	746.5	598	1252.5	947	9633.5	639.5	2310.5	842	1724.5	1911.5	4064	830.5
cfa-Mir-769-5p	MATURE		274184	cfa-Mir-769	274184	13	0	16	0	37	0	89	5	148	5		10		594	76	38	80	46	40	4873	14123	2754	6216	1970	7949	834	104	186	257	812	203201	107	351	74	55	69	1176	35	299	28	111	319	8784	1385
cfa-Mir-196-P3-5p	MATURE		39818	cfa-Mir-196-P3	39818	13	0	16	0	37	0	89	5	219	1		6		2	20	30	22	37	30	0	3	1	2	2	3	3864	446	640	423	5156	4	3	2	4	3	5	9	0	0	1	3	2	3	2462
cfa-Mir-378-5pS	STAR		26854	cfa-Mir-378	26854	13	0	16	0	37	0	89	5	219	1		6		131	5	5	3	3	11	11	55	19	56	16	112	264	39	37	19	351	425	123	393	90	129	184	1992	240	409	289	721	2816	73	80
cfa-Mir-96-P3-v1-5p	MATURE		92738	cfa-Mir-96-P3-v1	92738	13	0	16	0	37	0	96	4	79	14		18		4	1	1	2	2	4	22	27134	27	34	4130	619	836	72	190	223	1510	5952	98	234	428	30	400	23	1	10	12	4	13	3948	910
cfa-Mir-10-P1b-v2-5p	MATURE		1469950	cfa-Mir-10-P1b-v2	1469950	13	0	16	0	37	0	96	4	107	10		14		20	1152	2782	1846	2100	2624	94	446	110	252	424	1550	23034	2557	2783	11566	21490	746	866	2634	3650	12904	10242	41421	1872	4023	6621	3665	4272	1015	28739
cfa-Mir-28-P3-3pS	STAR		19416	cfa-Mir-28-P3	19416	13	0	16	0	37	0	96	4	107	10		14		0	8	3	2	2	0	95	291	21	119	74	399	58	7	13	45	48	7393	5	9	12	11	12	81	3	24	4	24	241	1188	156
cfa-Mir-196-P2-5p	MATURE		24969	cfa-Mir-196-P2	24969	13	0	16	0	37	0	96	4	117	8		12		1	10	20	7	20	14	0	2	0	2	0	2	832	108	176	8	1730	2	2	0	2	1	2	2	1	0	0	1	0	4	1310
cfa-Mir-143-5pS	STAR		41402	cfa-Mir-143	41402	13	0	16	0	37	0	96	4	129	7		11		1	0	1	0	0	0	4	22	1	6	0	26	393	54	40	11	119	257	12	68	64	35	14	202	12	75	6	50	3354	63	213
cfa-Mir-196-P1-5p	MATURE		13017	cfa-Mir-196-P1	13017	13	0	16	0	37	0	96	4	137	6		10		0	4	9	4	8	6	0	1	0	2	0	0	390	60	77	3	920	2	1	0	0	1	1	1	1	0	0	1	0	2	600
cfa-Mir-224-5p	MATURE		5357	cfa-Mir-224	5357	13	0	16	0	37	0	96	4	148	5		9		1	0	0	1	0	0	9	80	18	4	10	118	82	9	29	7	47	272	6	24	9	11	14	97	8	19	5	21	210	327	168
cfa-Mir-370-3p	MATURE		10067	cfa-Mir-370	10067	13	0	16	0	37	0	96	4	152	4		8		1	0	0	0	0	0	75	345	61	155	215	452	5	1	1	0	3	6484	0	1	4	6	0	7	0	5	1	2	11	1717	4
cfa-Mir-7-P1-5p	MATURE		36860	cfa-Mir-7-P1	36860	13	0	16	0	37	0	96	4	164	3		7		573	21	24	32	28	22	150	358	34	112	92	448	69	5	11	6	87	9982	9	45	4	6	12	12	0	4	1	1	977	8090	83
cfa-Mir-145-3pS	STAR		42922	cfa-Mir-145	42922	13	0	16	0	37	0	96	4	177	2		6		1	8	26	7	14	14	23	76	8	22	22	142	1802	227	157	38	237	270	34	146	435	201	112	446	40	72	24	80	2964	316	963
cfa-Mir-17-P1a-5p	MATURE		74177	cfa-Mir-17-P1a	74177	13	0	16	0	37	0	96	4	177	2		6		573	58	59	60	71	54	34	164	79	79	90	452	956	150	190	602	2214	2462	120	752	59	35	70	378	20	154	28	87	6487	623	2068
cfa-Mir-26-P1-5p	MATURE		1212208	cfa-Mir-26-P1	1212208	13	0	16	0	37	0	107	3	46	48		51		598	2154	1803	1526	2098	1654	2353	10211	5722	3798	3989	31326	17872	2491	3745	9197	23661	117971	3253	15491	3101	2383	3434	45827	2654	10457	2076	9761	45638	35897	27375
cfa-Mir-199-P1-v1-3p	MATURE		111367	cfa-Mir-199-P1-v1	111367	13	0	16	0	37	0	107	3	94	11		14		6	27	58	32	42	50	57	312	69	67	35	359	1833	191	340	399	1395	2259	273	1107	238	188	177	2822	77	930	74	423	5131	534	2165
cfa-Mir-199-P1-v2-3p	MATURE		111368	cfa-Mir-199-P1-v2	111368	13	0	16	0	37	0	107	3	94	11		14		6	27	58	32	42	50	57	312	69	67	35	359	1833	191	340	399	1395	2259	273	1107	238	188	177	2823	77	930	74	423	5131	534	2165
cfa-Mir-199-P1-v3-3p	MATURE		111348	cfa-Mir-199-P1-v3	111348	13	0	16	0	37	0	107	3	94	11		14		6	27	58	32	42	50	57	312	69	67	35	359	1833	191	339	399	1395	2258	273	1107	237	188	177	2822	77	930	74	423	5131	534	2164
cfa-Mir-199-P2-v1-3p	MATURE		111367	cfa-Mir-199-P2-v1	111367	13	0	16	0	37	0	107	3	94	11		14		6	27	58	32	42	50	57	312	69	67	35	359	1833	191	340	399	1395	2259	273	1107	238	188	177	2822	77	930	74	423	5131	534	2165
cfa-Mir-199-P2-v2-3p	MATURE		111368	cfa-Mir-199-P2-v2	111368	13	0	16	0	37	0	107	3	94	11		14		6	27	58	32	42	50	57	312	69	67	35	359	1833	191	340	399	1395	2259	273	1107	238	188	177	2823	77	930	74	423	5131	534	2165
cfa-Mir-199-P2-v3-3p	MATURE		111348	cfa-Mir-199-P2-v3	111348	13	0	16	0	37	0	107	3	94	11		14		6	27	58	32	42	50	57	312	69	67	35	359	1833	191	339	399	1395	2258	273	1107	237	188	177	2822	77	930	74	423	5131	534	2164
cfa-Mir-199-P3-v1-3p	MATURE		111367	cfa-Mir-199-P3-v1	111367	13	0	16	0	37	0	107	3	94	11		14		6	27	58	32	42	50	57	312	69	67	35	359	1833	191	340	399	1395	2259	273	1107	238	188	177	2822	77	930	74	423	5131	534	2165
cfa-Mir-199-P3-v2-3p	MATURE		111368	cfa-Mir-199-P3-v2	111368	13	0	16	0	37	0	107	3	94	11		14		6	27	58	32	42	50	57	312	69	67	35	359	1833	191	340	399	1395	2259	273	1107	238	188	177	2823	77	930	74	423	5131	534	2165
cfa-Mir-199-P3-v3-3p	MATURE		111348	cfa-Mir-199-P3-v3	111348	13	0	16	0	37	0	107	3	94	11		14		6	27	58	32	42	50	57	312	69	67	35	359	1833	191	339	399	1395	2258	273	1107	237	188	177	2822	77	930	74	423	5131	534	2164
cfa-Mir-31-5p	MATURE		68933	cfa-Mir-31	68933	13	0	16	0	37	0	107	3	111	9		12		6	7	10	8	3	9	82	407	314	106	107	1723	1475	169	428	337	2549	4586	621	3048	536	31	441	2256	126	108	96	360	1221	1701	1906
cfa-Mir-342-3p	MATURE		88236	cfa-Mir-342	88236	13	0	16	0	37	0	107	3	111	9		12		352	17	34	23	53	43	945	3164	599	2521	2264	2832	413	40	54	1313	915	45185	111	1260	101	82	157	597	58	156	119	199	529	4395	1086
cfa-Mir-181-P2c-5p	MATURE		132838	cfa-Mir-181-P2c	132838	13	0	16	0	37	0	107	3	117	8		11		52	44	49	44	59	50	1137	5774	13268	3009	4990	20076	1456	178	180	238	1405	37048	114	661	411	428	196	2466	124	550	130	396	1391	12158	1252
cfa-Mir-455-5p	MATURE		33315	cfa-Mir-455	33315	13	0	16	0	37	0	107	3	117	8		11		1	2	1	0	0	1	27	91	86	30	29	572	136	15	31	31	173	1427	48	220	45	26	24	128	2	34	1	11	610	284	381
cfa-Mir-328-3p	MATURE		9914	cfa-Mir-328	9914	13	0	16	0	37	0	107	3	137	6		9		555	0	1	0	0	0	76	403	110	297	221	379	13	3	2	12	14	4875	0	4	11	5	6	64	6	10	9	16	112	1031	9
cfa-Mir-374-P1-5p	MATURE		92053	cfa-Mir-374-P1	92053	13	0	16	0	37	0	107	3	164	3		6		14	72	72	84	85	70	29	132	139	87	144	1081	603	80	98	226	731	4171	123	557	49	32	72	549	17	160	11	103	5824	1868	1022
cfa-Mir-7-P2-5p	MATURE		35950	cfa-Mir-7-P2	35950	13	0	16	0	37	0	107	3	164	3		6		547	6	9	17	8	5	146	356	32	113	92	432	65	5	10	6	86	9878	9	41	4	6	12	12	0	4	1	1	943	8044	81
cfa-Mir-7-P3-5p	MATURE		35919	cfa-Mir-7-P3	35919	13	0	16	0	37	0	107	3	164	3		6		545	6	9	18	8	5	146	355	32	113	92	431	65	5	10	6	86	9860	9	41	4	6	12	12	0	4	1	1	942	8040	81
cfa-Let-7-P2c1-5p	MATURE		134330	cfa-Let-7-P2c1	134330	13	0	16	0	37	0	107	3	177	2		5		1354	28	38	40	28	35	1002	4174	3128	2075	1785	5894	2675	340	390	1863	3074	35233	259	1363	377	374	518	2004	80	747	180	387	1380	4668	3445
cfa-Mir-29-P1b3-3p	MATURE		89849	cfa-Mir-29-P1b3	89849	13	0	16	0	37	0	107	3	177	2		5		6	18	14	14	16	17	300	1087	1043	388	199	8511	500	67	102	167	464	38034	83	252	85	26	69	2156	186	914	50	633	2035	6248	658
cfa-Mir-29-P1b4-3p	MATURE		89849	cfa-Mir-29-P1b4	89849	13	0	16	0	37	0	107	3	177	2		5		6	18	14	14	16	17	300	1087	1043	388	199	8511	500	67	102	167	464	38034	83	252	85	26	69	2156	186	914	50	633	2035	6248	658
cfa-Let-7-P2b3-5p	MATURE		299058	cfa-Let-7-P2b3	299058	13	0	16	0	37	0	107	3	219	1		4		20	1541	1640	1362	2085	1670	2432	8259	4617	9399	4810	10730	4683	778	741	3410	6495	76084	2999	9813	506	479	1966	2704	125	978	140	616	459	9408	8074
cfa-Mir-133-P3-v1-3p	MATURE		10695	cfa-Mir-133-P3-v1	10695	13	0	16	0	37	0	107	3	219	1		4		1	0	0	0	0	0	0	3	5	2	0	25	22	3	2	0	4	39	1	4	3	1	0	740	75	261	48	303	1078	6	9
cfa-Mir-133-P3-v2-3p	MATURE		10695	cfa-Mir-133-P3-v2	10695	13	0	16	0	37	0	107	3	219	1		4		1	0	0	0	0	0	0	3	5	2	0	25	22	3	2	0	4	39	1	4	3	1	0	740	75	261	48	303	1078	6	9
cfa-Mir-6529-5p	MATURE		45974	cfa-Mir-6529	45974	13	0	16	0	37	0	107	3	277	0		3		3728	27	14	27	24	18	592	2350	548	1309	1274	699	509	42	118	603	554	7011	20	220	56	81	35	1564	88	597	86	368	353	2483	774
cfa-Mir-10-P3a-5p	MATURE		702841	cfa-Mir-10-P3a	702841	13	0	16	0	37	0	132	2	57	30		32		1037	22	51	26	43	38	2610	7394	2830	5712	6742	37828	2363	207	253	326	852	150676	74	138	998	954	462	9797	637	2972	573	2546	43965	90882	1021
cfa-Mir-10-P3c-5p	MATURE		698018	cfa-Mir-10-P3c	698018	13	0	16	0	37	0	132	2	57	30		32		1032	22	51	26	43	38	2616	7390	2840	5719	6776	37728	2357	208	253	322	852	150738	74	138	1002	960	464	9746	630	2960	571	2516	42679	90360	1017
cfa-Mir-30-P2a-5p	MATURE		749617	cfa-Mir-30-P2a	749617	13	0	16	0	37	0	132	2	63	21		23		9770	29	76	50	58	56	2340	7910	4134	2590	2005	16496	3274	407	624	1772	3293	140390	331	1600	1122	726	950	23679	1472	6443	887	3820	55343	24309	4002
cfa-Mir-30-P2b-5p	MATURE		749621	cfa-Mir-30-P2b	749621	13	0	16	0	37	0	132	2	63	21		23		9770	29	76	50	58	56	2340	7910	4134	2590	2005	16496	3275	407	624	1772	3293	140390	331	1600	1122	726	950	23679	1472	6443	887	3820	55343	24309	4002
cfa-Mir-1307-3pS	STAR		20090.4	cfa-Mir-1307	20090.4	13	0	16	0	37	0	132	2	77	15		17		837	4	3	7	3	3	114	556	256	269	218	964	274	11	79	261	306	8343	14	70	31	19	29	371	32	92	9	78	132	1143	168
cfa-Mir-28-P3-5p	MATURE		47240	cfa-Mir-28-P3	47240	13	0	16	0	37	0	132	2	89	12		14		1	15	17	12	19	25	104	391	42	390	108	470	111	16	14	54	175	7501	13	34	16	17	54	84	7	52	14	17	1104	1246	215
cfa-Mir-24-P1-5pS	STAR		11380.3	cfa-Mir-24-P1	11380.3	13	0	16	0	37	0	132	2	107	10		12		8	2	0	1	1	2	7	28	2	9	9	78	121	16	23	29	113	558	10	47	13	9	15	525	33	119	12	141	2149	169	128
cfa-Mir-139-5p	MATURE		73742	cfa-Mir-139	73742	13	0	16	0	37	0	132	2	117	8		10		5	6	10	8	10	13	921	3309	44	3203	848	239	341	48	44	30	299	47075	35	149	159	138	132	345	38	73	57	99	1670	1936	243
cfa-Mir-188-P2-5p	MATURE		114310	cfa-Mir-188-P2	114310	13	0	16	0	37	0	132	2	129	7		9		393	84	52	54	50	53	182	747	338	410	338	1264	1168	233	218	1213	1855	6549	183	1194	148	110	217	873	37	298	30	155	674	2026	2383
cfa-Mir-101-P1-v1-3p	MATURE		354871	cfa-Mir-101-P1-v1	354871	13	0	16	0	37	0	132	2	137	6		8		21	151	122	114	155	132	442	1428	2934	552	576	17014	2113	308	390	498	1591	54549	236	1070	150	94	186	3309	178	957	48	644	16858	8584	3283
cfa-Mir-101-P2-v1-3p	MATURE		354871	cfa-Mir-101-P2-v1	354871	13	0	16	0	37	0	132	2	137	6		8		21	151	122	114	155	132	442	1428	2934	552	576	17014	2113	308	390	498	1591	54549	236	1070	150	94	186	3309	178	957	48	644	16858	8584	3283
cfa-Mir-1271-5p	MATURE		35556	cfa-Mir-1271	35556	13	0	16	0	37	0	132	2	137	6		8		4196	6	14	6	6	10	94	389	105	211	312	3008	152	12	27	228	133	1377	20	31	62	80	58	452	22	123	48	76	1295	5510	307
cfa-Mir-128-P1-3p	MATURE		970476	cfa-Mir-128-P1	970476	13	0	16	0	37	0	132	2	137	6		8		3458	21	22	20	18	18	15157	42021	17762	26206	14699	39674	411	44	70	401	530	727310	28	252	56	64	57	612	40	312	32	131	695	44051	564
cfa-Mir-128-P2-3p	MATURE		970476	cfa-Mir-128-P2	970476	13	0	16	0	37	0	132	2	137	6		8		3458	21	22	20	18	18	15157	42021	17762	26206	14699	39674	411	44	70	401	530	727310	28	252	56	64	57	612	40	312	32	131	695	44051	564
cfa-Mir-744-5p	MATURE		203600	cfa-Mir-744	203600	13	0	16	0	37	0	132	2	152	4		6		3151	1	4	3	2	4	1851	6755	3329	3617	3655	4711	828	55	190	396	665	113589	31	133	219	171	83	607	27	379	36	97	707	19695	913
cfa-Mir-8-P1a-5pS	STAR		16755	cfa-Mir-8-P1a	16755	13	0	16	0	37	0	132	2	152	4		6		3	0	0	0	0	0	0	152	0	0	16	1	550	68	120	2	855	140	44	172	91	5	55	0	0	1	0	0	1	199	334
cfa-Mir-96-P1-5p	MATURE		32719	cfa-Mir-96-P1	32719	13	0	16	0	37	0	132	2	152	4		6		2	0	0	0	0	0	0	148	0	0	26	75	32	5	9	1	54	345	7	6	10	0	17	0	0	0	0	0	4	923	29
cfa-Mir-34-P1-5p	MATURE		20039	cfa-Mir-34-P1	20039	13	0	16	0	37	0	132	2	177	2		4		0	8	4	10	8	4	30	111	91	82	28	1360	90	13	17	30	123	2229	16	28	12	3	9	353	16	67	32	53	1002	947	215
cfa-Mir-193-P1b-5pS	STAR		1425.5	cfa-Mir-193-P1b	1425.5	13	0	16	0	37	0	132	2	219	1		3		6	0	0	0	0	0	4	12	2	9	7	4	1	0	0	0	1	206	0	0	4	1	1	40	1	10	11	21	213	19	5
cfa-Mir-499-5p	MATURE		610571	cfa-Mir-499	610571	13	0	16	0	37	0	132	2	219	1		3		56	0	4	5	0	3	29	143	36	69	41	379	146	15	34	57	161	4246	17	88	18	9	10	30405	1805	3570	1133	6400	469727	635	282
cfa-Mir-154-P18-3p	MATURE		3605	cfa-Mir-154-P18	3605	13	0	16	0	37	0	132	2	277	0		2		1	0	0	0	0	0	14	31	20	11	13	48	1	1	0	0	11	1512	0	0	5	3	2	5	0	5	0	2	60	130	1
cfa-Mir-17-P2a-5p	MATURE		13291	cfa-Mir-17-P2a	13291	13	0	16	0	37	0	132	2	277	0		2		9	14	22	28	33	26	6	16	4	22	10	44	347	119	60	183	1222	299	212	1258	12	11	102	48	2	22	1	4	126	69	1118
cfa-Mir-22-P1a-5pS	STAR		12863	cfa-Mir-22-P1a	12863	13	0	16	0	37	0	132	2	277	0		2		4	2	4	1	5	5	44	213	39	144	48	141	91	22	18	40	128	1985	10	95	28	14	23	561	59	151	57	153	653	208	107
cfa-Mir-326-3p	MATURE		1086	cfa-Mir-326	1086	13	0	16	0	37	0	132	2	277	0		2		289	0	0	0	0	0	4	35	25	33	12	43	2	1	1	9	4	319	2	4	1	0	1	3	0	1	1	1	3	49	5
cfa-Mir-874-3p	MATURE		64565	cfa-Mir-874	64565	13	0	16	0	37	0	132	2	277	0		2		7	1	2	1	1	2	631	1505	2349	1153	1540	11743	85	8	22	69	113	31208	5	42	40	25	24	454	11	112	15	41	261	5884	135
cfa-Mir-193-P1a-3pS	STAR		10999.9	cfa-Mir-193-P1a	10999.9	13	0	16	0	37	0	164	1.5	151	4.5		6		2	7	5	3	4	9	2	15	3	4	2	114	223	26	39	25	109	1672	23	49	15	9	43	183	22	55.5	4	70	13.5	53	197
cfa-Mir-199-P2-v1-5pS	STAR		75473.4	cfa-Mir-199-P2-v1	75473.4	13	0	16	0	37	0	165	1.33333	83	12.5		13.8333		10.4444	4.16667	11.6667	6	10.8333	8.83333	9.16667	41.6111	10.1667	11.8333	6.16667	83.1667	372.389	42.3333	56.9444	60.8333	279.944	263	85.7778	313.333	69.1111	43.1667	62.1667	414.167	12.3333	116	12.8333	60.1111	2860.06	131.944	571.389
cfa-Mir-199-P2-v2-5pS	STAR		75473.4	cfa-Mir-199-P2-v2	75473.4	13	0	16	0	37	0	165	1.33333	83	12.5		13.8333		10.4444	4.16667	11.6667	6	10.8333	8.83333	9.16667	41.6111	10.1667	11.8333	6.16667	83.1667	372.389	42.3333	56.9444	60.8333	279.944	263	85.7778	313.333	69.1111	43.1667	62.1667	414.167	12.3333	116	12.8333	60.1111	2860.06	131.944	571.389
cfa-Mir-199-P2-v3-5pS	STAR		75473.4	cfa-Mir-199-P2-v3	75473.4	13	0	16	0	37	0	165	1.33333	83	12.5		13.8333		10.4444	4.16667	11.6667	6	10.8333	8.83333	9.16667	41.6111	10.1667	11.8333	6.16667	83.1667	372.389	42.3333	56.9444	60.8333	279.944	263	85.7778	313.333	69.1111	43.1667	62.1667	414.167	12.3333	116	12.8333	60.1111	2860.06	131.944	571.389
cfa-Mir-199-P3-v1-5pS	STAR		75496.4	cfa-Mir-199-P3-v1	75496.4	13	0	16	0	37	0	165	1.33333	83	12.5		13.8333		10.4444	4.16667	11.6667	6	10.8333	8.83333	9.16667	41.6111	10.1667	11.8333	6.16667	83.1667	373.056	42.3333	56.9444	61.5	280.611	263.667	85.7778	316	69.1111	43.5	62.1667	414.167	12.3333	116	12.8333	60.1111	2860.06	131.944	572.389
cfa-Mir-199-P3-v2-5pS	STAR		75498.1	cfa-Mir-199-P3-v2	75498.1	13	0	16	0	37	0	165	1.33333	83	12.5		13.8333		10.4444	4.16667	11.6667	6	10.8333	8.83333	9.16667	41.6111	10.1667	11.8333	6.16667	83.1667	373.389	42.3333	56.9444	61.5	280.611	263.667	86.1111	316	69.1111	43.5	62.1667	414.167	12.3333	116	12.8333	60.4444	2860.06	131.944	572.722
cfa-Mir-199-P3-v3-5pS	STAR		75473.8	cfa-Mir-199-P3-v3	75473.8	13	0	16	0	37	0	165	1.33333	83	12.5		13.8333		10.4444	4.16667	11.6667	6	10.8333	8.83333	9.16667	41.6111	10.1667	11.8333	6.16667	83.1667	372.389	42.3333	56.9444	60.8333	279.944	263	85.7778	313.333	69.1111	43.1667	62.1667	414.167	12.3333	116	12.8333	60.1111	2860.06	131.944	571.389
cfa-Mir-1249-3p	MATURE		26938	cfa-Mir-1249	26938	13	0	16	0	37	0	171	1	94	11		12		231	2	1	1	3	0	370	1253	287	1378	924	461	83	11	5	43	59	13377	3	17	34	22	9	371	49	142	51	111	176	2740	74
cfa-Mir-27-P1-5pS	STAR		3078.5	cfa-Mir-27-P1	3078.5	13	0	16	0	37	0	171	1	117	8		9		9	6	3	0	12	5	0	3	0	0	1	3	54	4	17	28	29	22	0	37	13	13	7	35	2	16	7	7	98	7	36
cfa-Mir-199-P1-v1-5pS	STAR		82315.8	cfa-Mir-199-P1-v1	82315.8	13	0	16	0	37	0	171	1	134	6.66667		7.66667		9.44444	1	3.66667	1.66667	2.33333	2	6.66667	43.4444	7	13	5.33333	155	290.222	52.3333	79.4444	46	340.111	643.333	23.7778	105.667	35.7778	38.3333	41.3333	632.667	25.6667	259.333	18.3333	130.111	4647.56	229.444	180.889
cfa-Mir-199-P1-v2-5pS	STAR		82318.8	cfa-Mir-199-P1-v2	82318.8	13	0	16	0	37	0	171	1	134	6.66667		7.66667		9.44444	1	3.66667	1.66667	2.33333	2	6.66667	43.4444	7	13	5.33333	155	290.222	52.3333	79.4444	46	340.111	643.667	23.7778	105.667	36.1111	38.3333	41.3333	632.667	25.6667	259.667	18.3333	130.111	4647.56	229.444	180.889
cfa-Mir-199-P1-v3-5pS	STAR		82315.1	cfa-Mir-199-P1-v3	82315.1	13	0	16	0	37	0	171	1	134	6.66667		7.66667		9.44444	1	3.66667	1.66667	2.33333	2	6.66667	43.4444	7	13	5.33333	155	290.222	52.3333	79.4444	46	340.111	643.333	23.7778	105.667	35.7778	38.3333	41.3333	632.667	25.6667	259.333	18.3333	130.111	4647.56	229.444	180.889
cfa-Mir-17-P3c-3p	MATURE		52312	cfa-Mir-17-P3c	52312	13	0	16	0	37	0	171	1	152	4		5		12424	113	100	124	96	108	91	279	265	148	167	651	652	90	122	674	1084	3319	111	514	72	107	138	529	18	197	18	67	795	832	1179
cfa-Mir-185-3pS	STAR		1555	cfa-Mir-185	1555	13	0	16	0	37	0	171	1	152	4		5		75	0	0	0	0	0	10	72	18	33	17	57	11	1	0	15	24	531	1	8	2	1	2	25	0	4	0	4	7	135	21
cfa-Mir-146-P2-3pS	STAR		273	cfa-Mir-146-P2	273	13	0	16	0	37	0	171	1	164	3		4		0	0	0	0	0	0	2	0	1	0	0	0	1	0	0	0	1	22	0	0	0	0	0	0	0	0	0	1	1	4	0
cfa-Mir-361-v1-5p	MATURE		32566	cfa-Mir-361-v1	32566	13	0	16	0	37	0	171	1	164	3		4		478	26	29	24	29	28	173	456	231	258	342	1062	491	82	99	286	756	4708	76	550	118	116	114	666	29	168	53	146	914	1444	767
cfa-Mir-10-P1a-v2-5p	MATURE		992174	cfa-Mir-10-P1a-v2	992174	13	0	16	0	37	0	171	1	177	2		3		91	628	980	762	755	824	30	252	50	76	211	1067	46484	3152	5857	7127	32880	768	1533	4643	2063	7740	5796	20589	136	1302	1488	836	2414	770	53810
cfa-Mir-130-P1a-3p	MATURE		145152	cfa-Mir-130-P1a	145152	13	0	16	0	37	0	171	1	177	2		3		1	76	129	65	82	126	900	4180	2784	1186	1366	5142	2270	302	360	726	1365	25250	144	578	692	803	529	11878	967	2696	578	3596	1424	3887	2252
cfa-Mir-15-P1c-5p	MATURE		105172	cfa-Mir-15-P1c	105172	13	0	16	0	37	0	171	1	177	2		3		5	31	30	26	24	42	317	1464	2203	277	287	4820	1302	148	274	416	1475	21216	195	795	155	97	128	3534	134	716	64	561	3415	2465	1797
cfa-Mir-17-P3c-5p	MATURE		41733	cfa-Mir-17-P3c	41733	13	0	16	0	37	0	171	1	177	2		3		87	26	25	32	40	35	49	158	128	72	56	846	639	63	107	313	908	4632	72	470	20	23	44	213	5	93	5	43	2265	731	1217
cfa-Mir-193-P2a-3p	MATURE		29705	cfa-Mir-193-P2a	29705	13	0	16	0	37	0	171	1	177	2		3		852	6	9	4	2	4	102	208	54	182	84	168	370	67	44	94	258	1869	24	65	176	180	113	1002	76	148	50	282	1164	259	276
cfa-Mir-193-P2b-3p	MATURE		4633	cfa-Mir-193-P2b	4633	13	0	16	0	37	0	171	1	177	2		3		82	0	1	1	0	0	12	32	6	31	6	8	40	8	4	12	26	226	1	6	14	18	12	52	6	12	4	20	148	16	22
cfa-Mir-504-v1-5p	MATURE		8871	cfa-Mir-504-v1	8871	13	0	16	0	37	0	171	1	177	2		3		42	1	0	0	0	0	113	272	15	300	148	94	14	1	2	2	4	4019	1	0	2	1	6	41	8	6	6	26	879	1146	3
cfa-Mir-181-P1a-3pS	STAR		85564	cfa-Mir-181-P1a	85564	13	0	16	0	37	0	171	1	216	1.5		2.5		21	30	41	30	57	58	563	2342.5	816.5	1318	1640	3459	412.5	61	73	217.5	430.5	45732.5	29	191	36.5	15.5	24.5	293	18.5	34.5	11	48	149.5	7158.5	685
cfa-Mir-181-P1c-3pS	STAR		109886	cfa-Mir-181-P1c	109886	13	0	16	0	37	0	171	1	216	1.5		2.5		18	17	11	8	20	20	778.5	2874.5	4556.5	1263	1466	16404	757.5	66	109	127	551	55032.5	57	280	95	69	67	1312	66	340	33	193	535.5	9950.5	722.5
cfa-Mir-134-5p	MATURE		4068	cfa-Mir-134	4068	13	0	16	0	37	0	171	1	219	1		2		0	0	0	0	0	0	45	124	46	82	87	160	7	1	0	0	12	2317	0	0	3	10	2	4	0	3	2	1	18	809	3
cfa-Mir-1343-3p	MATURE		28370	cfa-Mir-1343	28370	13	0	16	0	37	0	171	1	219	1		2		10873	0	2	3	7	5	139	415	88	673	270	617	21	1	5	36	51	9028	5	18	11	4	17	60	8	38	10	21	121	2536	39
cfa-Mir-19-P1-3p	MATURE		19670	cfa-Mir-19-P1	19670	13	0	16	0	37	0	171	1	219	1		2		8	30	23	17	28	15	8	12	22	13	11	380	250	24	104	103	644	1135	89	175	17	2	17	147	4	56	1	14	410	450	718
cfa-Mir-218-P1-5p	MATURE		78603	cfa-Mir-218-P1	78603	13	0	16	0	37	0	171	1	219	1		2		4	7	12	12	8	8	520	1848	902	1186	412	4218	136	28	25	33	126	43092	18	60	28	33	52	209	12	117	8	40	890	2886	251
cfa-Mir-218-P2-5p	MATURE		77979	cfa-Mir-218-P2	77979	13	0	16	0	37	0	171	1	219	1		2		4	7	12	12	8	8	518	1840	898	1179	412	4208	134	28	25	32	122	42812	17	60	28	33	52	208	12	117	8	40	880	2819	251
cfa-Mir-221-P1-5pS	STAR		11857	cfa-Mir-221-P1	11857	13	0	16	0	37	0	171	1	219	1		2		9	2	6	6	7	7	87	190	59	167	153	751	140	7	22	58	190	3975	8	21	15	9	13	44	3	14	2	5	171	766	139
cfa-Mir-374-P1-3pS	STAR		57386	cfa-Mir-374-P1	57386	13	0	16	0	37	0	171	1	219	1		2		0	23	15	20	20	26	183	621	506	270	465	2320	990	44	222	491	751	17909	79	344	98	73	97	1950	104	572	55	351	717	4413	1183
cfa-Let-7-P1b-5p	MATURE		386057	cfa-Let-7-P1b	386057	13	0	16	0	37	0	171	1	277	0		1		15	31	39	24	19	34	4663	17485	17592	11059	8318	23179	3518	586	536	990	2992	144897	352	1679	1339	1366	687	5962	396	1744	469	1229	3442	18062	3826
cfa-Mir-1301-3p	MATURE		2586	cfa-Mir-1301	2586	13	0	16	0	37	0	171	1	277	0		1		166	0	0	1	3	0	9	44	29	26	33	153	19	2	4	13	28	759	3	18	3	2	5	11	2	5	1	2	25	329	45
cfa-Mir-15-P1a-5p	MATURE		119979	cfa-Mir-15-P1a	119979	13	0	16	0	37	0	171	1	277	0		1		44	149	143	90	149	111	185	779	1982	223	355	7360	1738	225	361	1571	2910	22216	280	2288	131	63	168	2062	92	652	50	383	851	3645	4113
cfa-Mir-15-P1b-5p	MATURE		58693	cfa-Mir-15-P1b	58693	13	0	16	0	37	0	171	1	277	0		1		2567	55	71	103	70	78	67	271	108	133	202	451	1429	186	217	1232	3270	2235	102	1102	230	136	220	702	34	270	65	108	797	623	2900
cfa-Mir-154-P13-5p	MATURE		479688	cfa-Mir-154-P13	479688	13	0	16	0	37	0	171	1	277	0		1		2	1	6	0	3	1	4311	13408	7829	4328	5042	29836	1651	210	385	118	1192	328237	8	15	828	394	203	1430	52	664	41	235	238	56468	810
cfa-Mir-154-P16-3p	MATURE		26543	cfa-Mir-154-P16	26543	13	0	16	0	37	0	171	1	277	0		1		1	0	0	0	0	0	257	892	121	397	268	783	14	3	1	3	14	18856	0	1	2	0	3	13	1	9	1	0	15	4625	5
cfa-Mir-154-P22-3p	MATURE		4447	cfa-Mir-154-P22	4447	13	0	16	0	37	0	171	1	277	0		1		1	0	0	0	0	0	42	154	57	108	55	257	0	2	2	0	10	3154	0	0	1	2	0	4	0	1	0	1	6	493	0
cfa-Mir-154-P26-3p	MATURE		4749	cfa-Mir-154-P26	4749	13	0	16	0	37	0	171	1	277	0		1		0	0	0	0	0	0	26	85	36	44	19	195	6	0	1	0	5	2480	0	0	3	0	1	8	0	3	0	1	31	885	4
cfa-Mir-154-P36-3pS	STAR		168392	cfa-Mir-154-P36	168392	13	0	16	0	37	0	171	1	277	0		1		0	1	0	0	2	0	2674	8336	1633	4980	3022	3954	265	42	74	33	275	110071	8	23	106	132	66	472	15	148	17	57	52	26322	110
cfa-Mir-17-P1c-3pS	STAR		3450.5	cfa-Mir-17-P1c	3450.5	13	0	16	0	37	0	171	1	277	0		1		1195	1	2	1	1	4	8	43	18	8	9	93	30	2	5	36	66	513	4	13	5	6	6	28	1	9	1	4	9	135	45
cfa-Mir-186-3pS	STAR		190	cfa-Mir-186	190	13	0	16	0	37	0	171	1	277	0		1		1	0	0	0	0	0	1	3	2	0	0	5	0	0	0	2	6	81	0	1	0	0	0	4	0	0	1	1	1	2	2
cfa-Mir-208-P2-3p	MATURE		98664	cfa-Mir-208-P2	98664	13	0	16	0	37	0	171	1	277	0		1		0	0	1	1	1	1	0	8	3	1	3	241	8	0	1	4	8	136	1	5	3	2	0	30483	1655	276	721	8211	4657	138	10
cfa-Mir-219-P1-3pS	STAR		1298	cfa-Mir-219-P1	1298	13	0	16	0	37	0	171	1	277	0		1		35	2	0	2	0	1	10	24	32	9	20	87	14	1	6	23	23	210	3	13	3	4	3	19	0	7	3	0	7	75	37
cfa-Mir-32-3pS	STAR		581.333	cfa-Mir-32	581.333	13	0	16	0	37	0	171	1	277	0		1		0	2	0	1	1	0	0	3	0	0	1	4	4	2	1	1	8	44	0	4	0	0	0	4	0	3	0	0	2	8	3
cfa-Mir-324-3pS	STAR		2704	cfa-Mir-324	2704	13	0	16	0	37	0	171	1	277	0		1		257	1	2	2	0	2	14	72	33	44	39	90	22	5	4	20	40	1256	4	19	5	2	6	11	2	2	0	2	3	148	40
cfa-Mir-33-P1-5p	MATURE		3957	cfa-Mir-33-P1	3957	13	0	16	0	37	0	171	1	277	0		1		0	1	1	1	1	0	6	21	20	6	13	462	15	2	6	8	31	2259	6	26	1	1	0	8	0	4	1	3	15	328	55
cfa-Mir-432-5p	MATURE		62031	cfa-Mir-432	62031	13	0	16	0	37	0	171	1	277	0		1		0	0	1	0	0	0	830	3546	518	3561	1983	1293	69	20	10	6	71	41745	0	6	44	44	25	54	4	27	8	12	37	6291	19
cfa-Mir-615-5pS	STAR		24	cfa-Mir-615	24	13	0	16	0	37	0	171	1	277	0		1		0	0	0	0	0	0	0	0	0	0	0	0	0	0	0	0	0	0	0	1	0	0	0	0	0	0	0	0	0	0	0
cfa-Mir-95-P1-3p	MATURE		15162	cfa-Mir-95-P1	15162	13	0	16	0	37	0	171	1	277	0		1		1	0	0	0	0	0	91	270	77	177	139	1323	5	2	0	4	8	7511	1	3	3	3	2	108	7	13	3	23	1510	1998	7
cfa-Mir-142-v2-5pS	STAR		83414.6	cfa-Mir-142-v2	83414.6	13	0	16	0	37	0	228	0.5	267	0.5		1		4.25	336.5	178.75	191.25	291.75	191.25	19	42.25	14.5	16.25	9.5	351	5127.25	532	1035	3951.75	5078.25	1529.5	352.75	4595.5	25	11.75	72.5	264.5	11.5	122.25	3	60.25	112.75	472	17884.8
cfa-Mir-142-v3-5pS	STAR		83414.6	cfa-Mir-142-v3	83414.6	13	0	16	0	37	0	228	0.5	267	0.5		1		4.25	336.5	178.75	191.25	291.75	191.25	19	42.25	14.5	16.25	9.5	351	5127.25	532	1035	3951.75	5078.25	1529.5	352.75	4595.5	25	11.75	72.5	264.5	11.5	122.25	3	60.25	112.75	472	17884.8
cfa-Mir-203-v1-5pS	STAR		295	cfa-Mir-203-v1	295	13	0	16	0	37	0	228	0.5	267	0.5		1		0	0	0	0	0	0	0	1.5	0	0.5	0	1	3.5	0.5	0.5	0	3	26	0	4	0.5	0	0	0	0	0	0	0	0.5	4.5	2.5
cfa-Mir-203-v2-5pS	STAR		295	cfa-Mir-203-v2	295	13	0	16	0	37	0	228	0.5	267	0.5		1		0	0	0	0	0	0	0	1.5	0	0.5	0	1	3.5	0.5	0.5	0	3	26	0	4	0.5	0	0	0	0	0	0	0	0.5	4.5	2.5
cfa-Let-7-P2a1-3pS	STAR		692.667	cfa-Let-7-P2a1	692.667	13	0	16	0	37	0	228	0.5	277	0		0.5		0.5	1	1	1.5	2	1	0	2.5	3	2.5	1.5	45.3333	3.5	0	1	3	10.5	165	1.5	16	0	0	0	3.5	0	2	0	0	25	32.5	10.5
cfa-Let-7-P2a2-3pS	STAR		692.667	cfa-Let-7-P2a2	692.667	13	0	16	0	37	0	228	0.5	277	0		0.5		0.5	1	1	1.5	2	1	0	2.5	3	2.5	1.5	45.3333	3.5	0	1	3	10.5	165	1.5	16	0	0	0	3.5	0	2	0	0	25	32.5	10.5
cfa-Mir-10-P1a-v1-3pS	STAR		6694.5	cfa-Mir-10-P1a-v1	6694.5	13	0	16	0	37	0	228	0.5	277	0		0.5		1	0	2	0.5	0	0.5	0	1	0	0.5	0	2	120	11	18.5	19	103	6.5	3	15.5	5	11.5	8	58	1	7	0.5	1.5	69.5	1	137
cfa-Mir-10-P1a-v2-3pS	STAR		6047.5	cfa-Mir-10-P1a-v2	6047.5	13	0	16	0	37	0	228	0.5	277	0		0.5		1	0	2	0.5	0	0.5	0	1	0	0.5	0	2	100	9	15.5	17	85.5	4.5	3	13.5	5	9.5	7	44	1	6	0.5	1.5	67	0	116
cfa-Mir-133-P1-v1-5pS	STAR		8225	cfa-Mir-133-P1-v1	8225	13	0	16	0	37	0	238	0.25	277	0		0.25		0.75	0	0	0.25	0	0	0.5	1.25	0	0.5	0	3.25	7.5	0.5	1.25	0	1.75	8.5	0.25	1.75	0.75	0	0	230.5	14	50	9.25	48.25	6616.75	2	3
cfa-Mir-133-P1-v2-5pS	STAR		8224.5	cfa-Mir-133-P1-v2	8224.5	13	0	16	0	37	0	238	0.25	277	0		0.25		0.75	0	0	0.25	0	0	0.5	1.25	0	0.5	0	3.25	7.5	0.5	1.25	0	1.75	8.5	0.25	1.75	0.75	0	0	230.5	14	50	9.25	48.25	6616.75	2	3
cfa-Mir-133-P2-v1-5pS	STAR		8221	cfa-Mir-133-P2-v1	8221	13	0	16	0	37	0	238	0.25	277	0		0.25		0.75	0.5	0	0.75	0	2	0.5	1.75	0	0.5	0	4.25	7.5	0.5	1.25	0	1.75	9	0.25	1.75	0.75	0	0	228.5	15	50.5	12.25	50.25	6598.25	2	3
cfa-Mir-133-P2-v2-5pS	STAR		8220.5	cfa-Mir-133-P2-v2	8220.5	13	0	16	0	37	0	238	0.25	277	0		0.25		0.75	0.5	0	0.75	0	2	0.5	1.75	0	0.5	0	4.25	7.5	0.5	1.25	0	1.75	9	0.25	1.75	0.75	0	0	228.5	14.5	50.5	12.25	50.25	6598.25	2	3
cfa-Mir-197-3p	MATURE		95930	cfa-Mir-197	95930	13	0	16	0	37	0	242	0	50	42		42		49251	44	28	45	51	47	358	1163	625	895	647	990	546	69	110	856	647	9286	79	393	299	167	207	1152	56	284	62	188	389	1290	780
cfa-Mir-19-P2a-3p	MATURE		61483	cfa-Mir-19-P2a	61483	13	0	16	0	37	0	242	0	117	8		8		132	106	158	120	200	210	46	63	128	48	82	1206	496	44	199	242	1157	4242	242	378	80	22	97	640	21	224	8	54	1042	1328	1286
cfa-Mir-19-P2b-3p	MATURE		61483	cfa-Mir-19-P2b	61483	13	0	16	0	37	0	242	0	117	8		8		132	106	158	120	200	210	46	63	128	48	82	1206	496	44	199	242	1157	4242	242	378	80	22	97	640	21	224	8	54	1042	1328	1286
cfa-Mir-214-v1-3p	MATURE		19460	cfa-Mir-214-v1	19460	13	0	16	0	37	0	242	0	117	8		8		2	2	8	2	3	5	6	43	5	18	5	16	186	38	29	98	310	110	53	310	92	116	100	324	14	97	36	50	666	32	296
cfa-Mir-214-v2-3p	MATURE		19464	cfa-Mir-214-v2	19464	13	0	16	0	37	0	242	0	117	8		8		2	2	8	2	3	5	6	43	5	18	5	16	186	38	29	98	310	110	53	310	92	116	100	324	14	97	37	50	666	32	296
cfa-Mir-30-P1b-3pS	STAR		158948	cfa-Mir-30-P1b	158948	13	0	16	0	37	0	242	0	129	7		7		475	22	21	36	36	37	683	2643.5	1407	1160	1813.5	4269	2155	250	355	1039	2001.5	22924	169	1097	524	502	395	13170	807.5	3122.5	1001	2034.5	2868	6561	2436
cfa-Mir-574-3p	MATURE		45748	cfa-Mir-574	45748	13	0	16	0	37	0	242	0	129	7		7		592	14	42	16	27	43	259	1174	113	553	195	199	732	232	151	857	1860	2993	236	648	435	320	1021	996	55	375	50	186	463	1747	784
cfa-Mir-425-5p	MATURE		84271	cfa-Mir-425	84271	13	0	16	0	37	0	242	0	137	6		6		8979	8	116	61	141	119	23	1139	369	522	436	2477	156	240	261	2435	3860	19539	21	1631	77	134	213	40	23	105	22	78	407	4765	387
cfa-Mir-652-3p	MATURE		9966	cfa-Mir-652	9966	13	0	16	0	37	0	242	0	148	5		5		4490	18	13	9	11	14	20	58	16	35	21	17	78	15	15	151	157	280	15	130	15	17	25	105	4	27	6	17	69	70	130
cfa-Mir-8-P2a-5pS	STAR		6434	cfa-Mir-8-P2a	6434	13	0	16	0	37	0	242	0	152	4		4		0	0	0	0	0	0	0	102	0	1	10	1	166	17	20	0	256	63	9	63	52	2	34	1	0	0	0	1	0	133	89
cfa-Mir-96-P3-v2-5p	MATURE		21765	cfa-Mir-96-P3-v2	21765	13	0	16	0	37	0	242	0	152	4		4		2	0	0	0	0	2	5	7082	8	8	1073	170	146	16	42	50	317	1366	22	54	99	4	88	6	0	2	4	2	1	1156	206
cfa-Mir-10-P2c-3pS	STAR		20483.5	cfa-Mir-10-P2c	20483.5	13	0	16	0	37	0	242	0	164	3		3		1	3	2	2	2	11	88	328	236	162	93	1574	75	16	18	21	32	6471	6	14	23	19	20	427	35	170	15	133	597	1372	42
cfa-Mir-28-P1-5p	MATURE		133958	cfa-Mir-28-P1	133958	13	0	16	0	37	0	242	0	164	3		3		32	41	87	53	59	58	313	1389	1255	451	283	2299	6681	716	1282	1806	4164	13239	415	2823	1446	714	564	5423	212	1134	192	813	2432	1366	5906
cfa-Mir-362-P2-v1-3p	MATURE		81717	cfa-Mir-362-P2-v1	81717	13	0	16	0	37	0	242	0	164	3		3		179	35	24	25	20	31	439	1533	666	761	1499	2882	953	73	164	954	940	12666	67	300	180	80	192	950	60	265	53	138	158	6101	1354
cfa-Mir-362-P4-3p	MATURE		25285	cfa-Mir-362-P4	25285	13	0	16	0	37	0	242	0	164	3		3		189	11	7	8	7	6	25	169	68	103	77	476	118	11	20	128	147	2046	15	71	19	11	21	141	6	50	3	24	462	1134	158
cfa-Mir-425-3pS	STAR		8261	cfa-Mir-425	8261	13	0	16	0	37	0	242	0	164	3		3		907	0	12	5	14	8	2	101	20	71	40	357	5	14	5	91	170	2245	0	73	4	14	14	1	1	8	1	14	165	401	5
cfa-Mir-671-5p	MATURE		1903	cfa-Mir-671	1903	13	0	16	0	37	0	242	0	164	3		3		12	3	6	4	0	1	8	15	5	5	7	31	31	2	7	17	62	404	4	13	0	0	6	31	3	4	6	4	14	55	39
cfa-Mir-1296-5p	MATURE		16480	cfa-Mir-1296	16480	13	0	16	0	37	0	242	0	177	2		2		2260	2	1	3	2	2	99	364	514	244	96	2603	56	2	10	18	48	7371	5	17	9	2	8	34	3	16	4	5	73	1115	50
cfa-Mir-15-P2a-5p	MATURE		857892	cfa-Mir-15-P2a	857892	13	0	16	0	37	0	242	0	177	2		2		1244	1971	1893	1570	1732	1700	1843	6454	11348	3029	4516	38630	17685	1903	3766	17219	25960	108885	1580	12478	2506	1503	2015	20472	902	5849	586	3148	5347	24179	37360
cfa-Mir-15-P2b-5p	MATURE		856766	cfa-Mir-15-P2b	856766	13	0	16	0	37	0	242	0	177	2		2		1227	1959	1884	1566	1722	1694	1847	6452	11368	3024	4516	38658	17682	1904	3761	17222	25979	108878	1574	12441	2507	1502	2008	20478	903	5849	586	3152	5299	24177	37354
cfa-Mir-15-P2c-5p	MATURE		223095	cfa-Mir-15-P2c	223095	13	0	16	0	37	0	242	0	177	2		2		8	204	437	213	269	403	534	1536	3015	1149	788	11708	2843	506	411	989	4266	17979	846	2662	857	524	847	4365	204	1009	222	633	10017	2660	4181
cfa-Mir-150-5p	MATURE		114015	cfa-Mir-150	114015	13	0	16	0	37	0	242	0	177	2		2		14188	28	81	101	55	118	171	637	128	291	161	481	2495	283	510	19155	5303	11339	262	1097	124	53	301	641	34	105	24	98	157	1012	7831
cfa-Mir-184-3p	MATURE		7672	cfa-Mir-184	7672	13	0	16	0	37	0	242	0	177	2		2		9	1	0	1	0	0	286	1271	182	309	311	530	27	1	1	0	19	3148	0	2	8	7	11	9	3	156	1	21	41	216	3
cfa-Mir-188-P1-5p	MATURE		2514	cfa-Mir-188-P1	2514	13	0	16	0	37	0	242	0	177	2		2		5	1	1	0	1	0	0	15	9	3	4	48	10	2	4	11	16	803	2	10	2	0	1	17	1	8	1	10	15	73	29
cfa-Mir-205-P1-3pS	STAR		184	cfa-Mir-205-P1	184	13	0	16	0	37	0	242	0	177	2		2		0	0	0	0	0	0	0	0	0	0	0	0	0	0	0	0	0	0	0	0	0	0	0	0	0	0	0	0	0	0	0
cfa-Mir-27-P2-5pS	STAR		7238	cfa-Mir-27-P2	7238	13	0	16	0	37	0	242	0	177	2		2		3	1	0	2	1	1	21	100	34	39	104	165	159	17	31	31	118	1659	8	36	39	33	12	528	22	205	34	107	187	449	77
cfa-Mir-29-P2a-3p	MATURE		24316	cfa-Mir-29-P2a	24316	13	0	16	0	37	0	242	0	177	2		2		16	0	2	2	3	1	58	157	61	123	44	1299	163	36	30	81	302	9031	51	261	18	5	22	111	8	49	3	25	936	1361	409
cfa-Mir-29-P2a-5pS	STAR		292.5	cfa-Mir-29-P2a	292.5	13	0	16	0	37	0	242	0	177	2		2		1.5	0	0	0	0	0	1	9	0	5	6	4	1	1	0	3	2	112.5	0	5	1	0	1	10	0	2	0	3	6	14	9
cfa-Mir-29-P2b-v1-3p	MATURE		24316	cfa-Mir-29-P2b-v1	24316	13	0	16	0	37	0	242	0	177	2		2		16	0	2	2	3	1	58	157	61	123	44	1299	163	36	30	81	302	9031	51	261	18	5	22	111	8	49	3	25	936	1361	409
cfa-Mir-331-3p	MATURE		42135	cfa-Mir-331	42135	13	0	16	0	37	0	242	0	177	2		2		17122	11	7	8	7	7	283	1059	453	908	423	674	147	24	33	213	196	9370	32	109	36	28	36	473	35	138	21	120	432	981	327
cfa-Mir-361-v2-3p	MATURE		14126	cfa-Mir-361-v2	14126	13	0	16	0	37	0	242	0	177	2		2		2203	4	2	3	3	4	14	66	102	30	36	498	100	9	24	194	142	1353	14	118	7	8	9	78	2	20	4	14	662	331	168
cfa-Mir-362-P1-5p	MATURE		15416	cfa-Mir-362-P1	15416	13	0	16	0	37	0	242	0	177	2		2		92	4	3	2	2	3	11	25	9	22	12	95	28	7	9	27	58	364	4	35	11	5	13	29	1	3	0	3	257	186	59
cfa-Mir-362-P2-v2-3p	MATURE		16796	cfa-Mir-362-P2-v2	16796	13	0	16	0	37	0	242	0	177	2		2		74	12	8	9	9	9	36	196	79	82	84	616	113	12	24	123	142	2216	12	74	20	13	21	149	8	49	4	22	95	1384	173
cfa-Mir-374-P2-5p	MATURE		69826	cfa-Mir-374-P2	69826	13	0	16	0	37	0	242	0	177	2		2		180	102	84	82	110	118	23	62	34	105	54	245	221	43	26	140	460	1273	81	257	36	29	53	277	19	146	13	59	4264	424	446
cfa-Mir-450-P3-5p	MATURE		85650	cfa-Mir-450-P3	85650	13	0	16	0	37	0	242	0	177	2		2		9	68	51	61	74	58	33	91	18	38	83	242	68	7	15	11	102	3684	43	248	1	1	2	175	6	18	2	32	364	1494	159
cfa-Mir-452-v2-5p	MATURE		4300	cfa-Mir-452-v2	4300	13	0	16	0	37	0	242	0	177	2		2		0	0	0	0	0	1	4	9	4	2	0	34	10	2	2	0	19	72	2	8	0	2	2	12	0	4	0	2	300	50	34
cfa-Mir-92-P1c-3p	MATURE		1401211	cfa-Mir-92-P1c	1401211	13	0	16	0	37	0	242	0	177	2		2		458	2	1	3	2	2	27977	92137	26094	26473	103613	99834	65	7	30	42	95	809981	13	16	146	46	17	82	13	55	23	45	2	206116	35
cfa-Mir-361-v1-3pS	STAR		21179	cfa-Mir-361-v1	21179	13	0	16	0	37	0	242	0	216	1.5		1.5		2833	5	3.5	3	5	5.5	55	204.5	170.5	100.5	100	848.5	145	11	32	214	187	4146	21.5	135.5	14	10.5	14	157.5	6	35.5	5.5	33	854.5	808.5	212
cfa-Mir-105-P1-5p	MATURE		24357	cfa-Mir-105-P1	24357	13	0	16	0	37	0	242	0	219	1		1		2	0	0	0	0	0	277	1138	50	549	256	219	17	1	2	1	14	18245	0	1	1	14	4	71	4	17	4	20	143	2038	14
cfa-Mir-105-P1-3pS	STAR		4484	cfa-Mir-105-P1	4484	13	0	16	0	37	0	242	0	219	1		1		0	0	0	0	0	0	94.5	359.5	15	151	91	56	2	0	1	0	4	3078.5	0	1	0	0	1	9	1	1	0	3	43	272.5	2
cfa-Mir-132-P1-3p	MATURE		253104	cfa-Mir-132-P1	253104	13	0	16	0	37	0	242	0	219	1		1		2	1	3	3	1	0	4601	18251	1008	8163	5131	3780	212	33	35	94	203	192864	42	313	53	61	44	142	12	56	20	21	28	13269	389
cfa-Mir-149-5p	MATURE		110667	cfa-Mir-149	110667	13	0	16	0	37	0	242	0	219	1		1		12	0	0	0	1	1	929	4043	377	3997	1856	1351	52	8	9	5	62	83561	3	29	25	21	15	213	12	77	8	56	42	10509	27
cfa-Mir-154-P15-5p	MATURE		27544	cfa-Mir-154-P15	27544	13	0	16	0	37	0	242	0	219	1		1		0	0	0	0	0	0	169	1044	329	263	554	1342	6	2	2	1	9	18481	0	0	7	9	5	11	0	9	0	5	10	4895	4
cfa-Mir-17-P1a-3pS	STAR		4611.83	cfa-Mir-17-P1a	4611.83	13	0	16	0	37	0	242	0	219	1		1		42	1	4	6	3	8	10	34	20	13	12	142	133	16	21	110	156	689	11	79	5	8	7	79	7	24	2	17	47	171	218
cfa-Mir-192-P1-3pS	STAR		1820	cfa-Mir-192-P1	1820	13	0	16	0	37	0	242	0	219	1		1		2	0	0	0	0	0	1	2	5	0	0	39	79	4	27	0	151	27	25	174	2	0	9	1	0	2	0	0	0	3	122
cfa-Mir-193-P2b-5pS	STAR		932	cfa-Mir-193-P2b	932	13	0	16	0	37	0	242	0	219	1		1		4	0	0	0	0	0	1	3	0	6	0	0	1	0	0	1	1	49	1	1	1	1	0	12	0	3	5	4	64	3	5
cfa-Mir-194-P1-5p	MATURE		469706	cfa-Mir-194-P1	469706	13	0	16	0	37	0	242	0	219	1		1		383	16	16	26	18	26	20	145	498	38	50	2057	18955	2505	4808	247	32557	2108	4614	56662	490	118	1490	119	11	72	10	20	875	478	31406
cfa-Mir-194-P2-5p	MATURE		489520	cfa-Mir-194-P2	489520	13	0	16	0	37	0	242	0	219	1		1		363	14	12	20	20	18	20	132	404	36	56	1484	14076	1662	3786	316	21323	1654	6174	90388	504	294	2546	108	12	86	9	28	566	401	43694
cfa-Mir-204-P1-5p	MATURE		599873	cfa-Mir-204-P1	599873	13	0	16	0	37	0	242	0	219	1		1		10	75	171	103	143	225	4408	13138	38792	12382	6702	91604	229	51	48	150	303	128448	62	172	264	374	588	2435	70	418	130	192	202	63302	285
cfa-Mir-29-P2b-v2-3p	MATURE		9960	cfa-Mir-29-P2b-v2	9960	13	0	16	0	37	0	242	0	219	1		1		16	0	1	1	1	0	22	67	30	52	21	382	57	10	6	32	80	2220	15	75	13	4	10	66	4	30	1	12	831	404	105
cfa-Mir-30-P1c-3pS	STAR		19441.5	cfa-Mir-30-P1c	19441.5	13	0	16	0	37	0	242	0	219	1		1		0	9	6	5	8	4	36	134.5	105	77.5	60.5	693.5	241	27	35	53	371	4636.5	14	83.5	10	4.5	26	1132.5	51	246	30	175	848.5	775	299.5
cfa-Mir-30-P2a-3pS	STAR		31221.5	cfa-Mir-30-P2a	31221.5	13	0	16	0	37	0	242	0	219	1		1		1	0	2	2	0	2	88	376	158	171	155	285	69	16	9	40	64	2773	18	53	68	85	74	1240	80	315	61	171	917	458.5	104
cfa-Mir-331-5pS	STAR		2016.5	cfa-Mir-331	2016.5	13	0	16	0	37	0	242	0	219	1		1		156	3	1	3	0	1	10	35	25	18	10	55	17	3	2	12	14	331	0	12	7	12	10	44	4	15	3	7	38	75	17
cfa-Mir-338-P1-5pS	STAR		14878	cfa-Mir-338-P1	14878	13	0	16	0	37	0	242	0	219	1		1		0	2	0	1	0	0	69	207	131	376	411	1149	16	2	2	3	10	8374	2	2	9	10	13	75	2	23	4	13	196	1726	10
cfa-Mir-483-3p	MATURE		430	cfa-Mir-483	430	13	0	16	0	37	0	242	0	219	1		1		0	0	0	0	0	0	0	2	1	1	0	0	0	0	0	0	0	5	0	2	1	0	0	2	0	1	0	0	5	0	3
cfa-Mir-505-v1-3p	MATURE		4416	cfa-Mir-505-v1	4416	13	0	16	0	37	0	242	0	219	1		1		176	10	8	9	12	10	18	68	22	28	25	46	42	10	8	48	80	860	5	31	11	3	11	50	2	10	4	10	22	232	72
cfa-Mir-505-v2-3p	MATURE		4416	cfa-Mir-505-v2	4416	13	0	16	0	37	0	242	0	219	1		1		176	10	8	9	12	10	18	68	22	28	25	46	42	10	8	48	80	860	5	31	11	3	11	50	2	10	4	10	22	232	72
cfa-Mir-615-3p	MATURE		131	cfa-Mir-615	131	13	0	16	0	37	0	242	0	219	1		1		8	0	0	0	0	0	0	0	0	0	0	0	0	0	0	1	0	0	0	0	0	0	0	0	0	0	0	0	0	1	2
cfa-Mir-676-5pS	STAR		264	cfa-Mir-676	264	13	0	16	0	37	0	242	0	219	1		1		3	0	0	0	0	0	1	22	1	3	3	3	0	0	0	1	0	74	0	0	1	0	0	6	0	0	0	1	3	9	0
cfa-Mir-744-3pS	STAR		3468	cfa-Mir-744	3468	13	0	16	0	37	0	242	0	219	1		1		15	0	0	1	0	0	14	61	38	41	13	344	16	1	4	7	18	1821	2	7	3	2	2	15	2	6	1	3	4	465	22
cfa-Mir-874-5pS	STAR		16151.3	cfa-Mir-874	16151.3	13	0	16	0	37	0	242	0	219	1		1		0	0	0	0	0	0	95	346	588	217	146	2464	17	3	3	7	21	9306	3	8	3	2	5	99	4	108	8	10	20	1528	22
cfa-Mir-92-P2b-3p	MATURE		59651	cfa-Mir-92-P2b	59651	13	0	16	0	37	0	242	0	219	1		1		42	36	44	29	54	43	180	791	213	291	292	944	878	122	193	1511	1238	6437	98	610	53	113	156	1032	59	162	33	206	1635	1786	2048
cfa-Mir-92-P2c-5pS	STAR		1461	cfa-Mir-92-P2c	1461	13	0	16	0	37	0	242	0	219	1		1		310	2	1	2	2	0	3	12	10	4	17	41	22	4	3	17	30	240	1	11	2	0	4	9	1	2	2	1	7	70	29
cfa-Mir-96-P2-3pS	STAR		224	cfa-Mir-96-P2	224	13	0	16	0	37	0	242	0	219	1		1		0	0	0	0	0	0	0	7	0	0	0	2	1	0	0	0	0	18	0	0	0	0	0	0	0	0	0	0	0	7	1
cfa-Mir-154-P2-v1-5pS	STAR		2706.5	cfa-Mir-154-P2-v1	2706.5	13	0	16	0	37	0	242	0	267	0.5		0.5		0.5	0	0	0	0	0	12	60	43	135	25	373	6.5	0.5	1	1	6.5	1604.5	0	0	12	0	4	2	0	2	0.5	0	2	168	4.5
cfa-Mir-154-P2-v2-5pS	STAR		2097.5	cfa-Mir-154-P2-v2	2097.5	13	0	16	0	37	0	242	0	267	0.5		0.5		0.5	0	0	0	0	0	8	38	29	113	18	331	5.5	0.5	1	1	2.5	1214.5	0	0	10	0	3	1	0	2	0.5	0	2	117	3.5
cfa-Mir-214-v1-5pS	STAR		2698.83	cfa-Mir-214-v1	2698.83	13	0	16	0	37	0	242	0	267	0.5		0.5		0	0	0.5	0.5	1	0.5	1.5	5	1.5	1.5	0.5	6.5	37.5	3.5	5	8	29	29	4.5	19	7	6.5	2.5	69	1	15.5	0.5	7.5	54.5	12.5	47.5
cfa-Mir-214-v2-5pS	STAR		2698.83	cfa-Mir-214-v2	2698.83	13	0	16	0	37	0	242	0	267	0.5		0.5		0	0	0.5	0.5	1	0.5	1.5	5	1.5	1.5	0.5	6.5	37.5	3.5	5	8	29	29	4.5	19	7	6.5	2.5	69	1	15.5	0.5	7.5	54.5	12.5	47.5
cfa-Mir-126-v2-5pS	STAR		986885	cfa-Mir-126-v2	986885	13	0	16	0	37	0	242	0	275	0.333333		0.333333		2	1377.67	1856.33	950	1329.67	1478	3478.33	11375	4102	6944.33	4248	17557	10569	1475.33	2164.67	6384.33	10269.3	151696	1737.67	8417	2500.67	4512	3942.33	107816	6553.67	17406	2743	22841	9648.33	27156	15114.7
cfa-Mir-126-v3-5pS	STAR		986887	cfa-Mir-126-v3	986887	13	0	16	0	37	0	242	0	275	0.333333		0.333333		2	1377.67	1856.33	950	1329.67	1478	3478.33	11375	4102	6944.33	4248	17557.3	10569	1475.33	2164.67	6384.33	10269.3	151696	1737.67	8417	2500.67	4512	3942.33	107816	6553.67	17406	2743	22841	9648.33	27156	15114.7
cfa-Let-7-P1a-3pS	STAR		157.5	cfa-Let-7-P1a	157.5		0		0		0		0		0		0		0	0	0	0	0	0	2	2	0	5	0	5.5	0	1	0	1	1	34	0	0	0	0	1	2	2	3	1	0	6	9.5	1
cfa-Let-7-P1b-3pS	STAR		3820	cfa-Let-7-P1b	3820		0		0		0		0		0		0		1	0	0	0	2	1	30	121	81	105	43	318.5	19	4	6	4	15	1706	1	9	9	11	8	27	1	17	3	12	39	248.5	17
cfa-Let-7-P1c-3pS	STAR		603.5	cfa-Let-7-P1c	603.5		0		0		0		0		0		0		0	1	0	0	0	1	3	3	4	7	3	19	1	3	0	1	0	203	2	0	1	0	1	7	0	3	2	2	12	45	4
cfa-Let-7-P2b2-3pS	STAR		1917.5	cfa-Let-7-P2b2	1917.5		0		0		0		0		0		0		250	0	4	0	0	2	11	59	5	26	44	75	11	1	5	2	10	765	3	7	0	2	5	21	2	10	1	5	3	117	10
cfa-Let-7-P2b3-3pS	STAR		155.5	cfa-Let-7-P2b3	155.5		0		0		0		0		0		0		0	0	0	0	0	1	0	1	0	0	0	8	1	0	0	0	2	60	1	4	0	0	0	1	0	0	0	1	3	11	1
cfa-Let-7-P2c3-3pS	STAR		922.5	cfa-Let-7-P2c3	922.5		0		0		0		0		0		0		0	1	4	1	1	2	5	7	7	8	4	113	15	0	2	2	15	446	4	10	0	0	4	10	0	4	0	3	4	64	17
cfa-Mir-1-P1-5pS	STAR		166	cfa-Mir-1-P1	166		0		0		0		0		0		0		0	0	0	0	0	0	0	0	0	0	0	1	2	0	0	0	0	5	0	0	0	0	0	19	2	8	12	15	24	0	0
cfa-Mir-1-P2-5pS	STAR		23	cfa-Mir-1-P2	23		0		0		0		0		0		0		0	0	0	0	0	0	0	0	0	0	0	0	1	0	0	0	0	2	0	0	0	0	0	1	0	3	0	0	1	0	0
cfa-Mir-1-P3-5pS	STAR		1	cfa-Mir-1-P3	1		0		0		0		0		0		0		0	0	0	0	0	0	0	0	0	0	0	0	0	0	0	0	0	0	0	0	0	0	0	0	0	0	0	0	0	0	0
cfa-Mir-10-P1b-v1-3pS	STAR		5911.83	cfa-Mir-10-P1b-v1	5911.83		0		0		0		0		0		0		0	1.5	2	1	2	1	0.5	0.5	0.5	0	0	2.5	33.5	3.5	5	14	37.5	0	1	3.5	5.5	7.5	4.5	42.5	1.5	6	2	4.5	98	3	36
cfa-Mir-10-P1b-v2-3pS	STAR		5231.33	cfa-Mir-10-P1b-v2	5231.33		0		0		0		0		0		0		0	1.5	2	1	2	1	0.5	0.5	0.5	0	0	1.5	29.5	3.5	2	12	30	0	1	2.5	5	7.5	3.5	35.5	1.5	5	2	3.5	88.5	2	33
cfa-Mir-10-P2a-3pS	STAR		336	cfa-Mir-10-P2a	336		0		0		0		0		0		0		0	0	0	0	0	0	1	7	1	4	6	5	4	1	0	3	6	90	0	0	0	2	2	26	2	13	2	7	9	18	3
cfa-Mir-10-P3a-3pS	STAR		30534	cfa-Mir-10-P3a	30534		0		0		0		0		0		0		2	2	2	0	2	1	420	1647	359	782	1285	1061	163	16	26	28	71	11904	8	13	113	106	34	1121	68	461	60	264	212	3741	76
cfa-Mir-10-P3b-3pS	STAR		2397	cfa-Mir-10-P3b	2397		0		0		0		0		0		0		0	0	0	0	0	0	16	74	59	58	38	146	32	5	2	4	22	648	6	11	6	12	3	54	5	15	5	16	62	122	21
cfa-Mir-101-P1-v1-5pS	STAR		1678	cfa-Mir-101-P1-v1	1678		0		0		0		0		0		0		0	0.5	1	0	0.5	0.5	13.5	37	35.5	6	7	93	16.5	1	2.5	5.5	12	712.5	1.5	7.5	0.5	0	0	53	4.5	19	2	19	2.5	65.5	14
cfa-Mir-101-P1-v2-5pS	STAR		3963.83	cfa-Mir-101-P1-v2	3963.83		0		0		0		0		0		0		0	1.5	3	1	1.5	2.5	15.5	46	69.5	13	12	414	43.5	5	7.5	12.5	31	1353.5	4.5	13.5	1.5	0	1	82	4.5	33	3	27	16.5	191.5	43
cfa-Mir-101-P2-v1-5pS	STAR		5.5	cfa-Mir-101-P2-v1	5.5		0		0		0		0		0		0		0	0	0	0.5	0	0	0	0	0	0	0	0	0	0	0	0	0	0.5	0	0	0	0	0	0	0	0	0	0	0	0	0
cfa-Mir-101-P2-v2-5pS	STAR		19.5	cfa-Mir-101-P2-v2	19.5		0		0		0		0		0		0		0	0	0	0.5	0	0	0	0	0	0	0	0	0	0	0	0	0	0.5	0	0	0	0	0	0	0	0	0	0	1	0	0
cfa-Mir-103-P1-5pS	STAR		16	cfa-Mir-103-P1	16		0		0		0		0		0		0		0	0.5	0	0	0	1	0	0.5	0	0.5	0	0	0	0	0	0	0	3.5	0	1	1	0	0	0	0	0	0	0	0	2	1
cfa-Mir-103-P2-5pS	STAR		175	cfa-Mir-103-P2	175		0		0		0		0		0		0		6	0.5	0	0	2	0	5	8.5	3	14.5	5	5	0	0	0	1	0	46.5	0	1	1	0	1	0	0	0	0	0	1	2	2
cfa-Mir-103-P3-5pS	STAR		281	cfa-Mir-103-P3	281		0		0		0		0		0		0		0	0	0	0	0	0	3	8	2	4	2	25	0	1	0	0	1	168	0	1	0	0	0	1	0	2	0	1	0	26	0
cfa-Mir-105-P2-3pS	STAR		33	cfa-Mir-105-P2	33		0		0		0		0		0		0		0	0	0	0	0	0	0.5	0.5	0	1	0	0	0	0	0	0	0	14.5	0	0	0	0	0	0	0	0	0	0	2	8.5	0
cfa-Mir-122-3pS	STAR		6978	cfa-Mir-122	6978		0		0		0		0		0		0		0	0	0	0	0	0	0	0	0	0	0	1	2	0	0	0	0	0	0	0	0	0	0	1	0	2	0	0	0	0	1
cfa-Mir-124-P1-v1-3p	MATURE		42279	cfa-Mir-124-P1-v1	42279		0		0		0		0		0		0		1	0	0	0	0	0	411	1415	1658	1184	838	8117	1	0	0	0	4	26075	0	1	2	2	1	0	0	1	1	0	2	2528	1
cfa-Mir-124-P1-v1-5pS	STAR		317.833	cfa-Mir-124-P1-v1	317.833		0		0		0		0		0		0		0	0	0	0	0	0	2.33333	13	7.5	12.3333	3.5	32.3333	0	0	0	0.166667	0	227	0	0	0	0	0	0	0	0	0	0	0	18.1667	0
cfa-Mir-124-P1-v2-3p	MATURE		39041	cfa-Mir-124-P1-v2	39041		0		0		0		0		0		0		1	0	0	0	0	0	396	1347	1582	1139	815	7481	1	0	0	0	3	23941	0	1	2	2	1	0	0	1	1	0	2	2293	1
cfa-Mir-124-P1-v2-5pS	STAR		317.833	cfa-Mir-124-P1-v2	317.833		0		0		0		0		0		0		0	0	0	0	0	0	2.33333	13	7.5	12.3333	3.5	32.3333	0	0	0	0.166667	0	227	0	0	0	0	0	0	0	0	0	0	0	18.1667	0
cfa-Mir-124-P2-v1-3p	MATURE		42279	cfa-Mir-124-P2-v1	42279		0		0		0		0		0		0		1	0	0	0	0	0	411	1415	1658	1184	838	8117	1	0	0	0	4	26075	0	1	2	2	1	0	0	1	1	0	2	2528	1
cfa-Mir-124-P2-v1-5pS	STAR		317.833	cfa-Mir-124-P2-v1	317.833		0		0		0		0		0		0		0	0	0	0	0	0	2.33333	13	7	12.3333	3.5	32.3333	0	0	0	0.166667	0	227.5	0	0	0	0	0	0	0	0	0	0	0	18.1667	0
cfa-Mir-124-P2-v2-3p	MATURE		39041	cfa-Mir-124-P2-v2	39041		0		0		0		0		0		0		1	0	0	0	0	0	396	1347	1582	1139	815	7481	1	0	0	0	3	23941	0	1	2	2	1	0	0	1	1	0	2	2293	1
cfa-Mir-124-P2-v2-5pS	STAR		317.833	cfa-Mir-124-P2-v2	317.833		0		0		0		0		0		0		0	0	0	0	0	0	2.33333	13	7	12.3333	3.5	32.3333	0	0	0	0.166667	0	227.5	0	0	0	0	0	0	0	0	0	0	0	18.1667	0
cfa-Mir-124-P3-v1-3p	MATURE		42279	cfa-Mir-124-P3-v1	42279		0		0		0		0		0		0		1	0	0	0	0	0	411	1415	1658	1184	838	8117	1	0	0	0	4	26075	0	1	2	2	1	0	0	1	1	0	2	2528	1
cfa-Mir-124-P3-v1-5pS	STAR		317.833	cfa-Mir-124-P3-v1	317.833		0		0		0		0		0		0		0	0	0	0	0	0	2.33333	13	7	12.3333	3.5	32.3333	0	0	0	0.166667	0	227.5	0	0	0	0	0	0	0	0	0	0	0	18.1667	0
cfa-Mir-124-P3-v2-3p	MATURE		39041	cfa-Mir-124-P3-v2	39041		0		0		0		0		0		0		1	0	0	0	0	0	396	1347	1582	1139	815	7481	1	0	0	0	3	23941	0	1	2	2	1	0	0	1	1	0	2	2293	1
cfa-Mir-124-P3-v2-5pS	STAR		317.833	cfa-Mir-124-P3-v2	317.833		0		0		0		0		0		0		0	0	0	0	0	0	2.33333	13	7	12.3333	3.5	32.3333	0	0	0	0.166667	0	227.5	0	0	0	0	0	0	0	0	0	0	0	18.1667	0
cfa-Mir-1249-5pS	STAR	nucleotide difference	9	cfa-Mir-1249	9		0		0		0		0		0		0		0	0	0	0	0	0	0	0	0	2	0	1	0	0	0	0	0	1	0	0	0	0	0	0	0	0	0	0	1	0	0
cfa-Mir-1251-5p	MATURE		12665	cfa-Mir-1251	12665		0		0		0		0		0		0		0	0	0	0	0	0	27	143	26	147	28	318	9	0	2	0	2	9327	0	0	1	0	1	0	0	1	0	0	0	2348	2
cfa-Mir-1251-3pS	STAR		57	cfa-Mir-1251	57		0		0		0		0		0		0		0	0	0	0	0	0	0	1	0	3	2	1	0	0	0	0	0	30	0	0	0	0	0	0	0	0	0	0	0	16	0
cfa-Mir-126-v1-5p	MATURE		986885	cfa-Mir-126-v1	986885		0		0		0		0		0		0		2	1378	1856	950	1330	1478	3478	11375	4102	6944	4248	17557	10569	1475	2165	6384	10269	151696	1738	8417	2501	4512	3942	107816	6554	17406	2743	22841	9648	27156	15115
cfa-Mir-127-5pS	STAR		9139	cfa-Mir-127	9139		0		0		0		0		0		0		0	0	0	0	0	0	71	243	132	115	86	565	13	1	6	2	16	5407	0	1	5	4	3	13	2	19	2	1	33	931	5
cfa-Mir-1271-3pS	STAR		239	cfa-Mir-1271	239		0		0		0		0		0		0		27	1	0	0	0	1	0	0	0	0	0	2	1	0	0	2	5	15	1	5	1	0	0	0	0	0	0	0	7	1	10
cfa-Mir-1277-5p	MATURE		3333	cfa-Mir-1277	3333		0		0		0		0		0		0		0	3	0	0	2	5	2	10	16	4	4	284	22	7	9	6	32	1247	2	22	2	1	1	14	2	8	0	2	73	263	68
cfa-Mir-1277-3pS	STAR		240	cfa-Mir-1277	240		0		0		0		0		0		0		0	0	0	0	0	0	0	0	2	0	0	31	0	0	0	0	2	80	0	1	0	0	0	3	0	0	0	0	6	13	0
cfa-Mir-128-P1-5pS	STAR		26545	cfa-Mir-128-P1	26545		0		0		0		0		0		0		8	4	0	0	5	5	562	2075	179	859	969	416	43	7	9	61	40	18464	1	13	7	17	4	102	10	37	8	16	27	1106	72
cfa-Mir-128-P2-5pS	STAR		4003	cfa-Mir-128-P2	4003		0		0		0		0		0		0		0	0	0	0	0	0	65	195	150	95	134	272	0	0	0	1	0	2767	0	0	0	1	0	0	0	1	0	0	0	160	0
cfa-Mir-129-P1-5p	MATURE		38838	cfa-Mir-129-P1	38838		0		0		0		0		0		0		148	42	29	29	66	38	494	2385	791	2271	1054	2524	8	2	2	2	5	24468	0	2	4	6	3	2	1	6	0	0	14	3632	6
cfa-Mir-129-P1-3pS	STAR		11587.5	cfa-Mir-129-P1	11587.5		0		0		0		0		0		0		459.5	26.5	23.5	25	69.5	32.5	376	1170.5	532.5	1686	613.5	674	1	0	1	3	4.5	5208.5	1	0	3	2	2	4.5	0	2	0	0	7	252.5	2
cfa-Mir-129-P2-5p	MATURE		38811	cfa-Mir-129-P2	38811		0		0		0		0		0		0		138	42	28	27	64	38	494	2385	790	2269	1054	2525	8	2	2	2	5	24456	0	2	4	6	3	2	1	6	0	0	14	3634	6
cfa-Mir-129-P2-3pS	STAR		26048.5	cfa-Mir-129-P2	26048.5		0		0		0		0		0		0		10.5	1.5	0.5	0	1.5	0.5	734	2471.5	1421.5	4193	1408.5	1418	14	0	0	10	9.5	11247.5	2	5	17	7	3	5.5	0	3	0	3	1	2444.5	16
cfa-Mir-1296-3pS	STAR		315	cfa-Mir-1296	315		0		0		0		0		0		0		0	0	0	0	0	0	0	0	2	0	0	77	1	0	0	0	0	192	0	0	0	0	0	0	0	0	0	0	0	32	1
cfa-Mir-1298-5p	MATURE		28525	cfa-Mir-1298	28525		0		0		0		0		0		0		1	0	0	0	0	0	194	359	4732	222	471	7438	2	0	0	0	0	10970	0	1	17	4	0	0	0	2	0	0	1	2852	2
cfa-Mir-1298-3pS	STAR	nucleotide difference	6364	cfa-Mir-1298	6364		0		0		0		0		0		0		0	0	0	0	0	0	44	149	122	122	232	204	0	0	0	0	0	4620	0	0	0	0	0	0	0	0	0	0	0	848	0
cfa-Mir-130-P1a-5pS	STAR		211	cfa-Mir-130-P1a	211		0		0		0		0		0		0		0	0	0	0	0	0	0	3	0	3	0	3	0	0	0	0	3	21	0	1	0	1	1	3	1	1	1	1	6	2	1
cfa-Mir-130-P1b-3p	MATURE		13827	cfa-Mir-130-P1b	13827		0		0		0		0		0		0		37	22	11	14	17	18	97	425	108	160	156	218	558	48	100	498	683	1760	40	242	24	20	21	97	6	55	3	8	24	316	926
cfa-Mir-130-P1b-5pS	STAR		6354	cfa-Mir-130-P1b	6354		0		0		0		0		0		0		685	4	5	8	5	1	63	190	55	100	115	176	137	19	22	116	190	1578	18	35	4	2	3	68	3	17	1	5	19	387	203
cfa-Mir-130-P2a-3p	MATURE		131592	cfa-Mir-130-P2a	131592		0		0		0		0		0		0		0	5	6	4	5	10	1074	2897	2412	1686	1206	11126	1024	102	264	511	1010	61810	102	530	113	82	71	2524	153	1125	68	488	39	14904	2328
cfa-Mir-130-P2a-5pS	STAR		480	cfa-Mir-130-P2a	480		0		0		0		0		0		0		1	0	0	0	0	0	3	8	5	4	2	25	1	0	0	2	5	211	0	3	0	0	0	7	1	0	0	2	13	42	1
cfa-Mir-130-P2b-3p	MATURE		7250	cfa-Mir-130-P2b	7250		0		0		0		0		0		0		0	1	0	0	1	3	102	246	74	145	70	286	222	33	55	124	220	2295	22	73	4	1	5	50	0	35	0	12	1	614	523
cfa-Mir-130-P2b-5pS	STAR		7	cfa-Mir-130-P2b	7		0		0		0		0		0		0		0	0	0	0	0	0	0	0	0	0	0	0	0	0	0	0	0	2	0	0	0	0	0	0	0	0	0	0	0	1	0
cfa-Mir-130-P4a-3p	MATURE		5230	cfa-Mir-130-P4a	5230		0		0		0		0		0		0		3	11	7	10	14	7	27	74	65	43	48	299	57	4	15	38	137	1717	10	67	8	7	4	108	10	50	8	22	149	312	141
cfa-Mir-130-P4a-5pS	STAR		400	cfa-Mir-130-P4a	400		0		0		0		0		0		0		15	1	0	2	4	0	4	5	2	3	3	23	6	0	1	3	9	145	1	3	0	1	0	5	0	2	0	0	2	28	7
cfa-Mir-1301-5pS	STAR		248	cfa-Mir-1301	248		0		0		0		0		0		0		1	0	0	0	0	0	0	13	6	3	4	9	0	0	0	1	0	129	0	0	1	0	0	5	0	1	0	0	1	16	3
cfa-Mir-132-P1-5p	MATURE		33018	cfa-Mir-132-P1	33018		0		0		0		0		0		0		0	0	0	0	0	0	497	1629	104	818	386	526	5	1	0	3	10	26181	0	15	4	1	0	14	0	4	0	1	28	2183	7
cfa-Mir-132-P2-5p	MATURE		27617	cfa-Mir-132-P2	27617		0		0		0		0		0		0		0	0	0	0	0	0	544	1680	79	1295	928	704	23	1	1	11	5	17235	2	13	5	3	4	16	2	2	0	0	7	4696	26
cfa-Mir-132-P2-3p	MATURE		33862	cfa-Mir-132-P2	33862		0		0		0		0		0		0		0	0	0	0	0	0	676	2306	164	966	669	568	31	2	1	26	15	24715	8	31	11	9	6	23	1	6	3	4	5	3029	44
cfa-Mir-133-P3-v1-5pS	STAR		4.5	cfa-Mir-133-P3-v1	4.5		0		0		0		0		0		0		0	0	0	0	0	0	0	0	0	0	0	0	0	0	0	0	0	0	0	0	0	0	0	0	0	0	0	0	0	0	0
cfa-Mir-133-P3-v2-5pS	STAR		4.5	cfa-Mir-133-P3-v2	4.5		0		0		0		0		0		0		0	0	0	0	0	0	0	0	0	0	0	0	0	0	0	0	0	0	0	0	0	0	0	0	0	0	0	0	0	0	0
cfa-Mir-134-3pS	STAR		155	cfa-Mir-134	155		0		0		0		0		0		0		0	0	0	0	0	0	1	6	1	1	2	5	1	0	0	0	0	75	0	0	0	0	0	1	0	0	0	0	0	56	0
cfa-Mir-1343-5pS	STAR	nucleotide difference	143	cfa-Mir-1343	143		0		0		0		0		0		0		10	0	0	0	0	0	2	2	1	6	2	3	0	0	0	0	2	86	0	0	3	0	1	0	0	1	1	0	0	2	2
cfa-Mir-135-P1-5p	MATURE		13331	cfa-Mir-135-P1	13331		0		0		0		0		0		0		0	0	0	0	1	0	28	144	58	145	52	485	9	3	4	1	20	2984	10	23	2	0	2	4	0	2	0	2	16	1655	27
cfa-Mir-135-P1-3pS	STAR		96	cfa-Mir-135-P1	96		0		0		0		0		0		0		0	0	0	0	0	0	1	5	0	3	14	0	0	0	0	1	0	28	0	0	0	0	0	0	0	0	0	0	1	24	2
cfa-Mir-135-P2-5p	MATURE		13389	cfa-Mir-135-P2	13389		0		0		0		0		0		0		0	0	0	0	1	0	28	146	56	145	52	491	9	3	4	1	20	3013	10	23	2	0	2	4	0	2	0	2	16	1678	27
cfa-Mir-135-P2-3pS	STAR		480	cfa-Mir-135-P2	480		0		0		0		0		0		0		1	0	0	0	0	0	1	11	9	4	5	18	0	0	0	0	4	104	0	2	0	0	0	0	0	0	0	0	1	60	0
cfa-Mir-135-P3-5p	MATURE		4529	cfa-Mir-135-P3	4529		0		0		0		0		0		0		0	0	0	0	0	0	4	13	275	4	15	2079	5	0	0	0	17	187	9	14	1	1	1	2	0	0	2	0	10	265	15
cfa-Mir-135-P3-3pS	STAR		15	cfa-Mir-135-P3	15		0		0		0		0		0		0		0	0	0	0	0	0	0	0	1	0	0	6	0	0	0	0	0	0	0	0	0	0	0	0	0	0	0	0	0	1	0
cfa-Mir-136-v1-3p	MATURE		82441	cfa-Mir-136-v1	82441		0		0		0		0		0		0		0	0	0	0	0	0	364	797	926	438	285	9614	122	18	36	5	90	54342	2	2	30	5	16	90	4	48	2	18	38	12078	72
cfa-Mir-136-v1-5pS	STAR		16954.8	cfa-Mir-136-v1	16954.8		0		0		0		0		0		0		0	0	0	0	0.5	0	30.5	97.5	126	45	29	2371	41.5	5.5	7	3	36	10761.5	0.5	1	3	1	3.5	23.5	0.5	15.5	1	8	15.5	2242.5	29
cfa-Mir-136-v2-3p	MATURE		82441	cfa-Mir-136-v2	82441		0		0		0		0		0		0		0	0	0	0	0	0	364	797	926	438	285	9614	122	18	36	5	90	54342	2	2	30	5	16	90	4	48	2	18	38	12078	72
cfa-Mir-136-v2-5pS	STAR		16954.8	cfa-Mir-136-v2	16954.8		0		0		0		0		0		0		0	0	0	0	0.5	0	30.5	97.5	126	45	29	2371	41.5	5.5	7	3	36	10761.5	0.5	1	3	1	3.5	23.5	0.5	15.5	1	8	15.5	2242.5	29
cfa-Mir-137-P1-v1-3p	MATURE		10690	cfa-Mir-137-P1-v1	10690		0		0		0		0		0		0		0	0	0	0	0	0	82	208	1	200	52	10	3	2	0	0	6	9342	1	1	0	0	0	0	0	0	0	0	6	714	4
cfa-Mir-137-P1-v1-5pS	STAR		91	cfa-Mir-137-P1-v1	91		0		0		0		0		0		0		0	0	0	0	0	0	2	5.5	0	8.5	4.5	0	0	0	0	0	0	65.5	0	0	0	0	0	0	0	0	0	0	0	2.5	0.5
cfa-Mir-137-P1-v2-3p	MATURE		12760	cfa-Mir-137-P1-v2	12760		0		0		0		0		0		0		1	0	0	0	0	0	98	254	1	246	60	13	3	2	0	0	8	11066	1	3	0	0	0	0	0	0	0	0	8	915	6
cfa-Mir-137-P1-v2-5pS	STAR		91	cfa-Mir-137-P1-v2	91		0		0		0		0		0		0		0	0	0	0	0	0	2	5.5	0	8.5	4.5	0	0	0	0	0	0	65.5	0	0	0	0	0	0	0	0	0	0	0	2.5	0.5
cfa-Mir-138-P1-5p	MATURE		374864	cfa-Mir-138-P1	374864		0		0		0		0		0		0		1	0	0	0	0	0	5928	21574	2504	13907	7669	5683	154	22	36	1416	186	296635	3	15	13	40	20	109	9	81	4	40	34	14436	310
cfa-Mir-138-P1-3pS	STAR		1162.5	cfa-Mir-138-P1	1162.5		0		0		0		0		0		0		0	0	0	0	0	0	11	71.5	9	69	59	31	3	3	0	7	4	674	0	2	0	1	0	0	0	1	0	0	1	108	11
cfa-Mir-138-P2-5p	MATURE	nucleotide difference	384	cfa-Mir-138-P2	384		0		0		0		0		0		0		0	0	0	0	0	0	4	29	0	13	7	13	0	0	0	1	0	253	0	0	0	0	0	0	0	1	0	0	0	27	0
cfa-Mir-138-P2-3pS	STAR		1109.5	cfa-Mir-138-P2	1109.5		0		0		0		0		0		0		1	0	0	0	0	0	25	92.5	12	77	20	33	1	0	1	0	0	752	1	2	1	1	1	0	1	1	0	0	1	61	4
cfa-Mir-1388-3pS	STAR	NOT IN HUMAN	16588	cfa-Mir-1388	16588		0		0		0		0		0		0		49	43	34	46	40	24	46	182	249	44	57	1170	208	16	56	103	171	3764	21	86	16	9	18	808	45	172	31	216	20	841	236
cfa-Mir-139-3pS	STAR	nucleotide difference	1518	cfa-Mir-139	1518		0		0		0		0		0		0		0	1	0	0	0	1	17	72	0	36	30	5	1	0	0	0	10	921	1	3	0	1	2	4	0	1	2	1	56	91	2
cfa-Mir-142-v1-5p	MATURE		83415	cfa-Mir-142-v1	83415		0		0		0		0		0		0		4	336	179	191	292	191	19	42	14	16	10	351	5127	532	1035	3952	5078	1530	353	4596	25	12	72	264	12	122	3	60	113	472	17885
cfa-Mir-142-v1-3pS	STAR		9921.7	cfa-Mir-142-v1	9921.7		0		0		0		0		0		0		5.25	12.75	6	12.5	13.25	6.25	2	7.5	2.25	2.5	0.75	37.25	373.75	61.25	88.5	413	847.75	202.75	77.75	518.25	2.25	1.5	10.25	19.75	0.75	8.5	0.75	5.25	86.75	49.75	1644
cfa-Mir-142-v2-3p	MATURE		9926	cfa-Mir-142-v2	9926		0		0		0		0		0		0		5	13	6	12	13	6	2	8	2	2	1	37	374	61	88	413	848	203	78	518	2	2	10	20	1	8	1	5	88	50	1644
cfa-Mir-142-v3-3p	MATURE		9926	cfa-Mir-142-v3	9926		0		0		0		0		0		0		5	13	6	12	13	6	2	8	2	2	1	37	374	61	88	413	848	203	78	518	2	2	10	20	1	8	1	5	88	50	1644
cfa-Mir-142-v4-3pS	STAR		35275.5	cfa-Mir-142-v4	35275.5		0		0		0		0		0		0		3.25	157	122	110.75	158.5	104.25	2	14.25	0.25	2.25	3.25	137.75	1941.75	213	408.5	1100.25	2671.25	582.25	353.75	2552.75	5.5	4	62.25	55	1.25	13.25	0	5.75	78.75	131.25	7995.25
cfa-Mir-144-v1-5p	MATURE		14822	cfa-Mir-144-v1	14822		0		0		0		0		0		0		12	94	94	140	60	74	37	50	15	12	7	268	44	4	12	3	32	1340	0	18	16	37	27	464	10	188	3	51	1308	354	41
cfa-Mir-144-v1-3pS	STAR		26793.8	cfa-Mir-144-v1	26793.8		0		0		0		0		0		0		36	101.5	89	87.5	56.5	61.5	10.5	25	11	3.5	1.5	383.5	50.5	9.5	6.5	1	48	1698	13	52.5	10.5	4.5	18.5	289	13.5	173.5	3.5	64.5	2199.5	367	88.5
cfa-Mir-144-v2-3p	MATURE		26791	cfa-Mir-144-v2	26791		0		0		0		0		0		0		36	102	89	88	56	62	10	25	11	4	2	384	50	10	6	1	48	1698	13	52	10	4	18	289	14	174	4	64	2200	367	88
cfa-Mir-144-v2-5pS	STAR		14822.1	cfa-Mir-144-v2	14822.1		0		0		0		0		0		0		12.5	93.5	93.5	140.5	59.5	74	37	50.5	15	12.5	7	268.5	44	4	12	3	32.5	1339.5	0.5	17.5	15.5	37	27	464.5	9.5	188	3	51	1308	354.5	41
cfa-Mir-146-P1-3pS	STAR		141	cfa-Mir-146-P1	141		0		0		0		0		0		0		0	0	0	0	0	0	0	0	1	0	0	0	5	1	0	6	17	9	1	2	1	0	0	0	0	0	0	0	0	0	13
cfa-Mir-147-v1-3p	MATURE		2192	cfa-Mir-147-v1	2192		0		0		0		0		0		0		0	0	1	0	0	1	0	0	0	0	0	2	437	38	88	6	670	18	10	70	5	0	4	1	0	0	0	0	1	9	212
cfa-Mir-147-v1-5pS	STAR	nucleotide difference	26	cfa-Mir-147-v1	26		0		0		0		0		0		0		0.5	1	0	0	0	0	0	0	0	0	0	0	1.5	0	0	0	3	0	0	0	0	0	0	0	0	0	0	0	0	0	0.5
cfa-Mir-147-v2-3p	MATURE		776	cfa-Mir-147-v2	776		0		0		0		0		0		0		0	0	0	0	0	0	0	0	0	0	0	2	148	13	33	2	210	9	4	36	2	0	1	0	0	0	0	0	0	3	80
cfa-Mir-147-v2-5pS	STAR	nucleotide difference	21	cfa-Mir-147-v2	21		0		0		0		0		0		0		0.5	0	0	0	0	0	0	0	0	0	0	0	1.5	0	0	0	2	0	0	0	0	0	0	0	0	0	0	0	0	0	0.5
cfa-Mir-148-P3-5pS	STAR		15161.5	cfa-Mir-148-P3	15161.5		0		0		0		0		0		0		111	2	0	2	1	2	68	162	75	67	28	808	312	19	51	96	240	5312	11	101	12	6	15	146	4	34	3	23	162	1107	317
cfa-Mir-149-3pS	STAR		42	cfa-Mir-149	42		0		0		0		0		0		0		0	0	0	0	0	0	0	3	0	0	0	0	0	0	0	0	0	36	0	0	0	0	0	1	0	0	0	0	1	0	0
cfa-Mir-15-P1a-3pS	STAR		49.75	cfa-Mir-15-P1a	49.75		0		0		0		0		0		0		2	1	0	0	0	0	0	0	0	1	0	0	0	0	0	0	1	1	0	6	0	0	0	1	0	0	0	0	0	0	1
cfa-Mir-15-P1b-3pS	STAR		3768.5	cfa-Mir-15-P1b	3768.5		0		0		0		0		0		0		406	4	7	7	7	10	2	9	6	4	1	29	107	9	14	25	120	112	16	99	6	4	9	22	1	5	1	3	37	23	166
cfa-Mir-15-P1c-3pS	STAR		191	cfa-Mir-15-P1c	191		0		0		0		0		0		0		0	0	0	0	0	0	0	2	0	0	0	26	2	1	1	0	0	47	0	3	0	0	0	5	0	2	0	1	5	2	3
cfa-Mir-15-P1d-5p	MATURE		30623	cfa-Mir-15-P1d	30623		0		0		0		0		0		0		1	74	67	59	104	65	5	31	10	28	19	64	44	20	18	6	165	1093	40	305	4	2	8	62	7	17	2	10	231	244	242
cfa-Mir-15-P1d-3pS	STAR		1648	cfa-Mir-15-P1d	1648		0		0		0		0		0		0		14	6	0	3	6	4	2	11	0	13	16	10	5	1	1	0	4	201	2	5	0	1	0	11	1	1	2	6	1	41	4
cfa-Mir-15-P2a-3pS	STAR		231	cfa-Mir-15-P2a	231		0		0		0		0		0		0		1	0	0	0	1	0	0	0	0	0	0	7	2	0	0	2	4	13	1	1	0	0	0	0	0	0	0	0	12	0	1
cfa-Mir-15-P2b-3pS	STAR	nucleotide difference	2106.5	cfa-Mir-15-P2b	2106.5		0		0		0		0		0		0		42	5	4	4	1	1	1	5	5	2	4	26	24	5	4	23	32	144	5	34	0	1	4	21	1	6	0	8	20	35	44
cfa-Mir-15-P2d-5p	MATURE	nucleotide difference	4116	cfa-Mir-15-P2d	4116		0		0		0		0		0		0		11	1	1	0	2	1	1	2	0	5	3	2	1	0	0	1	3	38	0	2	0	0	0	2	0	0	0	1	43	5	1
cfa-Mir-15-P2d-3pS	STAR		220	cfa-Mir-15-P2d	220		0		0		0		0		0		0		0	0	1	2	2	0	0	2	0	1	4	4	0	0	0	0	2	19	2	4	0	0	1	2	0	0	0	1	0	15	2
cfa-Mir-150-3pS	STAR		24	cfa-Mir-150	24		0		0		0		0		0		0		0	0	0	0	0	0	0	0	0	0	0	0	0	0	0	2	0	0	0	2	0	0	0	0	0	0	0	0	0	0	0
cfa-Mir-153-P1-3p	MATURE		43774	cfa-Mir-153-P1	43774		0		0		0		0		0		0		0	2	0	1	0	0	250	541	650	286	278	5268	58	8	14	11	46	29206	7	42	4	0	4	10	1	4	0	1	6	5304	70
cfa-Mir-153-P1-5pS	STAR		24320	cfa-Mir-153-P1	24320		0		0		0		0		0		0		0	0	0	0	1	0	245	592	248	243	164	1133	12	1	4	22	11	19657	0	3	0	0	0	2	0	0	0	1	1	1842	31
cfa-Mir-153-P2-3p	MATURE	nucleotide difference	43774	cfa-Mir-153-P2	43774		0		0		0		0		0		0		0	2	0	1	0	0	250	541	650	286	278	5268	58	8	14	11	46	29206	7	42	4	0	4	10	1	4	0	1	6	5304	70
cfa-Mir-153-P2-5pS	STAR		1513	cfa-Mir-153-P2	1513		0		0		0		0		0		0		0	0	0	0	0	0	7	17	29	15	9	153	2	0	0	0	4	1073	1	0	0	0	0	0	0	0	0	0	0	150	2
cfa-Mir-154-P10-5p	MATURE		11550	cfa-Mir-154-P10	11550		0		0		0		0		0		0		0	1	0	0	0	0	190	653	156	896	418	420	10	1	7	1	17	6890	0	2	8	12	7	13	2	9	1	7	20	1092	10
cfa-Mir-154-P10-3p	MATURE		4330	cfa-Mir-154-P10	4330		0		0		0		0		0		0		2	0	0	0	0	0	15	92	51	74	19	292	6	0	1	0	7	2667	0	0	1	1	1	3	0	1	0	0	40	414	3
cfa-Mir-154-P12-3p	MATURE		385113	cfa-Mir-154-P12	385113		0		0		0		0		0		0		0	0	1	1	1	2	6783	25255	10305	13381	11679	24303	445	73	109	34	312	230300	6	46	229	186	113	456	34	299	22	99	38	54445	214
cfa-Mir-154-P12-5pS	STAR		68	cfa-Mir-154-P12	68		0		0		0		0		0		0		0	0	0	0	0	0	0	7	2	4	0	2	0	0	0	0	1	45	0	0	1	0	0	0	0	0	0	0	0	4	0
cfa-Mir-154-P13-3pS	STAR		12015	cfa-Mir-154-P13	12015		0		0		0		0		0		0		0	0	0	0	0	0	89	396	101	216	124	723	18	1	3	5	18	8120	1	0	14	7	3	17	0	8.5	0	3	26	1558.5	12
cfa-Mir-154-P15-3pS	STAR		5022	cfa-Mir-154-P15	5022		0		0		0		0		0		0		0	0	0	0	0	0	64	342	44	269	144	116	5	0	2	1	3	3439	0	0	5	1	1	2	0	3	0	2	2	439	1
cfa-Mir-154-P17-3p	MATURE		50670	cfa-Mir-154-P17	50670		0		0		0		0		0		0		0	0	0	0	0	0	549	1884	834	792	721	2802	55	10	13	8	46	35638	3	2	35	25	12	63	1	32	3	9	17	6324	26
cfa-Mir-154-P17-5pS	STAR		483	cfa-Mir-154-P17	483		0		0		0		0		0		0		0	0	0	0	0	0	8	12	1	14	7	25	0	1	0	0	0	352	0	0	0	0	0	1	0	0	0	0	0	49	0
cfa-Mir-154-P18-5pS	STAR		33	cfa-Mir-154-P18	33		0		0		0		0		0		0		0	0	0	0	0	0	0	1	0	1	0	4	0	0	0	0	0	16	0	0	0	0	0	0	0	0	0	0	0	5	0
cfa-Mir-154-P19-3p	MATURE		5687	cfa-Mir-154-P19	5687		0		0		0		0		0		0		2	0	0	0	0	0	51	184	67	167	54	347	8	2	2	0	8	4247	0	0	5	2	0	5	0	4	1	0	2	345	1
cfa-Mir-154-P19-5pS	STAR	nucleotide difference	26	cfa-Mir-154-P19	26		0		0		0		0		0		0		0	0	0	0	0	0	0	0	0	5	0	1	0	0	0	0	0	20	0	0	0	0	0	0	0	0	0	0	0	0	0
cfa-Mir-154-P2-v2-3p	MATURE	nucleotide difference	5711	cfa-Mir-154-P2-v2	5711		0		0		0		0		0		0		0	0	0	0	0	0	42	146	74	64	36	382	8	4	2	1	12	3748	0	0	6	2	3	13	0	8	0	2	16	572	4
cfa-Mir-154-P20-3p	MATURE		881	cfa-Mir-154-P20	881		0		0		0		0		0		0		0	0	0	0	0	0	6	24	5	35	16	33	0	1	0	0	0	654	0	0	0	0	0	0	0	0	0	0	0	98	0
cfa-Mir-154-P20-5pS	STAR		1	cfa-Mir-154-P20	1		0		0		0		0		0		0		0	0	0	0	0	0	0	0	0	0	0	0	0	0	0	0	0	1	0	0	0	0	0	0	0	0	0	0	0	0	0
cfa-Mir-154-P21-5p	MATURE		1015	cfa-Mir-154-P21	1015		0		0		0		0		0		0		0	0	0	0	0	0	13	45	9	19	39	38	0	0	0	1	1	736	0	0	0	0	0	1	0	0	0	1	2	93	1
cfa-Mir-154-P21-3pS	STAR		4701	cfa-Mir-154-P21	4701		0		0		0		0		0		0		0	0	0	0	0	0	17	32	23	25	12	254	3	0	0	0	2	3579	0	0	0	0	0	3	0	0	0	0	0	712	0
cfa-Mir-154-P22-5pS	STAR		86	cfa-Mir-154-P22	86		0		0		0		0		0		0		0	0	0	0	0	0	0	0	1	1	2	8	0	0	0	0	0	62	0	0	0	0	1	0	0	0	0	0	0	5	0
cfa-Mir-154-P23-3p	MATURE		7204	cfa-Mir-154-P23	7204		0		0		0		0		0		0		0	0	0	0	0	0	51	177	69	165	53	394	20	3	5	3	15	4778	0	2	2	2	2	23	0	6	0	3	2	1079	6
cfa-Mir-154-P23-5pS	STAR		20	cfa-Mir-154-P23	20		0		0		0		0		0		0		0	0	0	0	0	0	0	1	1	0	0	0	0	0	0	0	0	8	0	0	0	0	0	0	0	0	0	0	2	2	0
cfa-Mir-154-P24-3p	MATURE		651	cfa-Mir-154-P24	651		0		0		0		0		0		0		0	0	0	0	1	0	2	8	6	38	3	46	0	2	0	0	2	406	0	0	2	0	1	1	0	0	0	0	5	39	1
cfa-Mir-154-P24-5pS	STAR	nucleotide difference	186	cfa-Mir-154-P24	186		0		0		0		0		0		0		0	0	0	0	0	0	6	7	3	1	1	8	0	0	0	0	0	121	0	0	1	0	0	0	0	0	0	0	0	31	0
cfa-Mir-154-P25-3p	MATURE		25801	cfa-Mir-154-P25	25801		0		0		0		0		0		0		2	0	0	0	0	0	102	229	106	192	63	1227	21	4	0	2	11	18208	0	1	6	2	0	12	0	8	0	3	51	4524	6
cfa-Mir-154-P25-5pS	STAR		757	cfa-Mir-154-P25	757		0		0		0		0		0		0		0	0	0	0	0	0	5	24	10	8	6	39	0	0	0	0	1	558	0	0	0	0	0	0	0	0	0	0	0	81	1
cfa-Mir-154-P26-5pS	STAR		33	cfa-Mir-154-P26	33		0		0		0		0		0		0		0	0	0	0	0	0	1	2	2	0	1	1	0	0	0	0	0	20	0	0	0	0	0	0	0	0	0	0	0	6	0
cfa-Mir-154-P27-3p	MATURE		136318	cfa-Mir-154-P27	136318		0		0		0		0		0		0		0	0	0	0	0	0	1405	3867	2787	2634	2045	9026	299	58	82	19	273	86310	7	13	90	48	69	198	10	117	12	36	193	20094	156
cfa-Mir-154-P27-5pS	STAR	nucleotide difference	411	cfa-Mir-154-P27	411		0		0		0		0		0		0		0	0	0	0	0	0	5	13	11	19	11	33	0	0	0	0	2	205	0	0	1	1	0	3	0	3	0	2	0	62	2
cfa-Mir-154-P28-3p	MATURE		3996	cfa-Mir-154-P28	3996		0		0		0		0		0		0		2	0	0	0	0	0	37	130	45	62	46	136	10	1	0	1	8	2649	0	1	0	0	2	5	0	9	0	3	19	378	4
cfa-Mir-154-P28-5pS	STAR		8273	cfa-Mir-154-P28	8273		0		0		0		0		0		0		0	0	0	0	0	0	53	154	92	85	32	573	3	0	2	0	4	5912	0	0	3	0	0	3	0	4	0	2	4	1244	2
cfa-Mir-154-P29-5p	MATURE		36	cfa-Mir-154-P29	36		0		0		0		0		0		0		0	0	0	0	0	0	1	1	0	1	0	1	0	0	0	0	0	24	0	0	0	0	0	0	0	0	0	0	0	2	0
cfa-Mir-154-P29-3pS	STAR		4	cfa-Mir-154-P29	4		0		0		0		0		0		0		0	0	0	0	0	0	0	0	0	0	0	0	0	0	0	0	0	2	0	0	0	0	0	0	0	0	0	0	0	1	0
cfa-Mir-154-P30-3p	MATURE		4448	cfa-Mir-154-P30	4448		0		0		0		0		0		0		0	0	0	0	0	0	19	50	18	30	12	145	1	0	1	0	3	3465	0	0	1	0	0	8	0	2	0	0	13	521	1
cfa-Mir-154-P30-5pS	STAR		6	cfa-Mir-154-P30	6		0		0		0		0		0		0		0	0	0	0	0	0	0	0	0	0	0	0	0	0	0	0	0	5	0	0	0	0	0	0	0	0	0	0	0	1	0
cfa-Mir-154-P31-5p	MATURE	NOT IN HUMAN	11547	cfa-Mir-154-P31	11547		0		0		0		0		0		0		0	0	0	0	0	0	66	246	95	127	94	495	31	4	9	2	20	5932	1	2	9	2	3	25	2	14	0	1	31	3036	20
cfa-Mir-154-P31-3p	MATURE	NOT IN HUMAN	3511	cfa-Mir-154-P31	3511		0		0		0		0		0		0		0	0	1	0	0	1	20	106	17	58	34	110	10	3	2	0	9	1885	0	0	3	0	2	7	0	2	0	3	4	1057	4
cfa-Mir-154-P33-3p	MATURE	NOT IN HUMAN	89307	cfa-Mir-154-P33	89307		0		0		0		0		0		0		2	0	0	0	0	0	639	2108	650	968	791	4120	56	5	9	3	41	65222	0	2	20	12	8	67	2	29	3	7	87	12331	13
cfa-Mir-154-P34-5pS	STAR	NOT IN HUMAN	2	cfa-Mir-154-P34	2		0		0		0		0		0		0		0	0	0	0	0	0	0	0	0	0	0	0	0	0	0	0	0	1	0	0	0	0	0	0	0	0	0	0	0	0	0
cfa-Mir-154-P35-3p	MATURE	NOT IN HUMAN	2378	cfa-Mir-154-P35	2378		0		0		0		0		0		0		1	0	0	0	0	0	5	24	18	28	14	46	0	0	0	0	0	453	0	0	1	2	0	5	0	0	0	0	75	109	0
cfa-Mir-154-P35-5pS	STAR	NOT IN HUMAN	29	cfa-Mir-154-P35	29		0		0		0		0		0		0		0	0	0	0	0	0	1	2	0	2	0	1	0	0	0	0	0	17	0	0	0	0	0	1	0	0	0	0	0	4	0
cfa-Mir-154-P36-5p	MATURE		6469	cfa-Mir-154-P36	6469		0		0		0		0		0		0		0	0	0	0	0	0	9	43	7	18	27	855	1	1	1	0	5	371	0	0	2	1	1	1	1	0	0	0	27	3805	0
cfa-Mir-154-P3a-v1-3p	MATURE		13042	cfa-Mir-154-P3a-v1	13042		0		0		0		0		0		0		0	0	0	0	0	0	117	460	154	344	189	526	6	2	0	0	6	9152	1	0	2	2	3	7	0	3	0	2	14	1789	3
cfa-Mir-154-P3a-v1-5pS	STAR		293	cfa-Mir-154-P3a-v1	293		0		0		0		0		0		0		0	0	0	0	0	0	2.5	8.5	4	17.5	14	8	0	0	0	0	0	185.5	0	0	0	0	0	0	0	0	0	0	0	49	0.5
cfa-Mir-154-P3a-v2-3p	MATURE		13042	cfa-Mir-154-P3a-v2	13042		0		0		0		0		0		0		0	0	0	0	0	0	117	460	154	344	189	526	6	2	0	0	6	9152	1	0	2	2	3	7	0	3	0	2	14	1789	3
cfa-Mir-154-P3a-v2-5pS	STAR		293	cfa-Mir-154-P3a-v2	293		0		0		0		0		0		0		0	0	0	0	0	0	2.5	8.5	4	17.5	14	8	0	0	0	0	0	185.5	0	0	0	0	0	0	0	0	0	0	0	49	0.5
cfa-Mir-154-P3b-3p	MATURE		52565	cfa-Mir-154-P3b	52565		0		0		0		0		0		0		2	0	2	0	0	0	347	1094	360	908	461	2615	23	3	4	1	11	40123	3	4	8	5	9	29	0	7	1	6	62	5836	8
cfa-Mir-154-P3b-5pS	STAR		5	cfa-Mir-154-P3b	5		0		0		0		0		0		0		0	0	0	0	0	0	0	0	0	0	0	0	0	0	0	0	0	4	0	0	0	0	0	0	0	0	0	0	0	1	0
cfa-Mir-154-P4a-3p	MATURE		702	cfa-Mir-154-P4a	702		0		0		0		0		0		0		0	0	0	0	0	0	4	13	4	36	5	30	2	1	0	0	0	338	0	0	1	1	1	2	0	0	0	0	4	175	1
cfa-Mir-154-P4a-5pS	STAR		44	cfa-Mir-154-P4a	44		0		0		0		0		0		0		0	0	0	0	0	0	0.5	0.5	0	0.5	0	2.5	0	0	0	0	0	33.5	0	0	0	0	0	0	0	0.5	0	0	0	6	0
cfa-Mir-154-P4b-5p	MATURE		44	cfa-Mir-154-P4b	44		0		0		0		0		0		0		0	0	0	0	0	0	0	0	0	0	0	2	0	0	0	0	0	34	0	0	0	0	0	0	0	0	0	0	0	6	0
cfa-Mir-154-P4b-3pS	STAR		0.5	cfa-Mir-154-P4b	0.5		0		0		0		0		0		0		0	0	0	0	0	0	0	0	0	0	0	0	0	0	0	0	0	0	0	0	0	0	0	0	0	0	0	0	0.5	0	0
cfa-Mir-154-P5-3p	MATURE		7578	cfa-Mir-154-P5	7578		0		0		0		0		0		0		1	0	0	0	0	0	41	104	51	46	14	255	25	3	5	0	29	5310	1	1	7	2	4	15	1	4	0	2	11	682	12
cfa-Mir-154-P5-5pS	STAR		13795	cfa-Mir-154-P5	13795		0		0		0		0		0		0		0	0	0	0	0	0	161	402	135	176	196	524	18	1	4	3	14	9704	0	1	10	9	5	32	0	15	3	6	5	1951	6
cfa-Mir-154-P6-3p	MATURE		583	cfa-Mir-154-P6	583		0		0		0		0		0		0		0	0	0	0	0	0	5	7	4	6	2	40	0	0	1	0	2	308	0	0	1	0	2	0	0	0	0	0	1	68	0
cfa-Mir-154-P6-5pS	STAR		1192	cfa-Mir-154-P6	1192		0		0		0		0		0		0		0	0	0	0	0	0	23	98	21	60	33	61	0	0	1	0	6	704	0	0	2	0	2	1	1	1	0	0	0	135	0
cfa-Mir-154-P7-3pS	STAR		2225	cfa-Mir-154-P7	2225		0		0		0		0		0		0		0	0	0	0	0	0	26	104	25	60	29	102	10	2	4	2	10	1113	0	1	9	3	4	22	0	6.5	0	2	10	317.5	6
cfa-Mir-154-P8-3p	MATURE		185191	cfa-Mir-154-P8	185191		0		0		0		0		0		0		0	0	0	0	0	0	2328	9028	3623	2711	2469	6224	140	21	48	17	168	127645	3	17	79	53	46	244	11	108	10	45	13	27084	85
cfa-Mir-154-P8-5pS	STAR		100	cfa-Mir-154-P8	100		0		0		0		0		0		0		0	0	0	0	0	0	0	3	0	4	0	5	0	0	0	0	0	42	0	0	0	0	0	0	0	0	0	0	1	15	0
cfa-Mir-154-P9-5pS	STAR		614	cfa-Mir-154-P9	614		0		0		0		0		0		0		0	0	0	0	0	0	4	17	7	14	8	57	0	0	0	0	0	395	0	0	1	0	1	1	0	1	0	0	1	65	0
cfa-Mir-155-3pS	STAR	nucleotide difference	18	cfa-Mir-155	18		0		0		0		0		0		0		0	0	0	0	0	0	0	0	0	0	0	0	1	0	0	0	1	1	0	1	0	0	0	0	0	0	0	0	0	0	1
cfa-Mir-17-P1b-5p	MATURE		8872	cfa-Mir-17-P1b	8872		0		0		0		0		0		0		1	0	2	2	1	5	2	32	14	12	11	71	54	17	8	78	119	368	8	42	4	7	14	42	0	10	4	8	702	54	208
cfa-Mir-17-P1b-3pS	STAR	nucleotide difference	42	cfa-Mir-17-P1b	42		0		0		0		0		0		0		1	0	0	0	0	0	0	0	0	0	0	0	1	0	0	0	1	2	0	1	0	0	0	0	0	0	0	0	1	0	2
cfa-Mir-17-P2a-3pS	STAR		3040.83	cfa-Mir-17-P2a	3040.83		0		0		0		0		0		0		2197.5	2	1	0	3	2	2	10	0	3	7	8	16	1	5	17	32	87	6	9	2	5	3	11	0	2	0	0	2	30	29
cfa-Mir-17-P2b-5p	MATURE		1291	cfa-Mir-17-P2b	1291		0		0		0		0		0		0		0	2	0	2	3	2	4	2	2	6	2	20	26	7	4	27	56	163	12	80	2	0	10	6	0	1	0	2	4	27	106
cfa-Mir-17-P2b-3pS	STAR	nucleotide difference	145.5	cfa-Mir-17-P2b	145.5		0		0		0		0		0		0		5.5	0	0	0	1	0	0	1	0	0	1	1	1	0	0	5	7	9	0	0	1	0	1	2	0	0	0	0	0	3	8
cfa-Mir-17-P3a-3pS	STAR		360	cfa-Mir-17-P3a	360		0		0		0		0		0		0		0	0	0	0	1	1	0	0	0	1	2	8	11	0	1	0	11	54	0	5	0	0	0	3	0	1	0	1	12	16	8
cfa-Mir-17-P3b-5p	MATURE	nucleotide difference	4696	cfa-Mir-17-P3b	4696		0		0		0		0		0		0		5	2	6	3	5	2	3	14	1	19	10	24	56	8	7	76	151	167	7	47	3	3	15	19	0	5	2	1	282	32	195
cfa-Mir-17-P3b-3pS	STAR		46	cfa-Mir-17-P3b	46		0		0		0		0		0		0		0	0	0	0	0	0	0	1	0	0	1	0	1	0	1	1	1	4	0	0	0	0	0	1	0	0	0	0	1	4	3
cfa-Mir-181-P2a-3pS	STAR		1021.5	cfa-Mir-181-P2a	1021.5		0		0		0		0		0		0		0	0	0	0	0	0	6	11	6	2	13	32.5	3	0	0	5	2	597	0	2	0	0	0	1	0	0	0	0	7	88	7
cfa-Mir-181-P2b-3pS	STAR		329.5	cfa-Mir-181-P2b	329.5		0		0		0		0		0		0		0	0	0	0	0	1	0	0	1	1	2	9.5	2	0	1	2	1	86	0	1	0	0	0	6	0	0	0	2	14	26	1
cfa-Mir-181-P2c-3pS	STAR		25	cfa-Mir-181-P2c	25		0		0		0		0		0		0		0	0	0	0	0	0	0	0	1	0	1	1	0	0	0	0	0	13	0	0	0	0	0	0	0	0	0	0	2	4	0
cfa-Mir-1835-5p	MATURE	NOT IN HUMAN	46	cfa-Mir-1835	46		0		0		0		0		0		0		4	0	0	0	0	0	0	0	0	0	0	0	1	0	0	3	2	0	0	1	0	0	0	0	0	0	0	0	4	0	3
cfa-Mir-1835-3p	MATURE	NOT IN HUMAN	292	cfa-Mir-1835	292		0		0		0		0		0		0		6	2	0	0	0	1	0	0	0	0	0	3	7	0	8	13	22	0	2	11	0	0	0	1	0	0	0	0	5	0	36
cfa-Mir-1838-3pS	STAR	NOT IN HUMAN	1349.33	cfa-Mir-1838	1349.33		0		0		0		0		0		0		1	2	4	3	0	2	4	38	10	28	30	53	15	3	0	6	28	642	1	8	1	7	6	9	1	6	1	2	4	103	17
cfa-Mir-184-5pS	STAR		4	cfa-Mir-184	4		0		0		0		0		0		0		0	0	0	0	0	0	0	2	0	0	0	0	0	0	0	0	0	1	0	0	0	0	0	0	0	0	0	0	0	0	0
cfa-Mir-1840-5p	MATURE	NOT IN HUMAN	384	cfa-Mir-1840	384		0		0		0		0		0		0		60	2	0	0	0	1	2	3	1	2	3	6	1	0	1	4	13	84	0	0	1	0	1	5	2	7	0	0	2	9	4
cfa-Mir-1842-v2-5p	MATURE	NOT IN HUMAN	1047	cfa-Mir-1842-v2	1047		0		0		0		0		0		0		66	0	0	0	0	0	3	16	12	8	2	65	10	0	1	4	10	347	2	4	0	1	0	11	0	2	0	0	19	88	8
cfa-Mir-1844-5p	MATURE	NOT IN HUMAN	1078	cfa-Mir-1844	1078		0		0		0		0		0		0		61	0	1	0	4	2	8	18	3	10	10	9	23	2	8	49	47	135	4	25	10	1	5	8	0	5	1	0	2	41	46
cfa-Mir-1844-3p	MATURE	NOT IN HUMAN	238	cfa-Mir-1844	238		0		0		0		0		0		0		41	0	0	0	0	0	0	2	1	0	1	3	5	1	0	10	9	53	0	0	1	0	0	0	0	0	0	0	2	18	8
cfa-Mir-187-3p	MATURE		5462	cfa-Mir-187	5462		0		0		0		0		0		0		1	2	0	0	0	0	64	363	28	418	88	192	6	0	1	10	6	3682	0	9	1	0	2	1	0	0	0	0	2	393	8
cfa-Mir-187-5pS	STAR	nucleotide difference	4	cfa-Mir-187	4		0		0		0		0		0		0		0	0	0	0	0	0	0	0	0	0	1	0	0	0	0	0	0	3	0	0	0	0	0	0	0	0	0	0	0	0	0
cfa-Mir-188-P1-3pS	STAR		179	cfa-Mir-188-P1	179		0		0		0		0		0		0		0	0	0	0	0	0	0	1	0	1	0	10	0	0	0	1	5	39	0	0	1	0	0	0	0	1	0	0	1	15	5
cfa-Mir-188-P3-5p	MATURE		73658	cfa-Mir-188-P3	73658		0		0		0		0		0		0		8	133	136	103	134	129	180	686	249	340	207	2059	568	94	125	436	774	15117	99	584	47	27	81	398	13	114	8	59	392	3402	1302
cfa-Mir-188-P3-3pS	STAR		201	cfa-Mir-188-P3	201		0		0		0		0		0		0		2	0	0	0	1	1	0	0	0	0	0	1	2	0	1	0	3	16	0	0	0	0	0	0	0	1	0	1	3	10	0
cfa-Mir-19-P1-5pS	STAR		55	cfa-Mir-19-P1	55		0		0		0		0		0		0		0	1	0	2	0	1	0	0	0	0	0	1	3	0	0	0	0	3	0	3	0	0	0	0	0	0	0	0	0	2	1
cfa-Mir-19-P2a-5pS	STAR		112	cfa-Mir-19-P2a	112		0		0		0		0		0		0		0	0	0	0	0	0	0	0	0	0	0	0	0	0	2	2	5	8	0	0	0	0	0	1	0	0	0	0	1	0	1
cfa-Mir-19-P2b-5pS	STAR		2	cfa-Mir-19-P2b	2		0		0		0		0		0		0		0	0	0	0	0	0	0	0	0	0	0	0	0	0	0	0	0	0	0	0	0	0	0	0	0	0	0	0	0	0	0
cfa-Mir-190-P1-5p	MATURE		7186	cfa-Mir-190-P1	7186		0		0		0		0		0		0		0	0	2	2	0	1	35	92	116	60	23	639	41	7	8	7	78	2363	12	65	10	4	10	144	12	31	5	29	266	343	50
cfa-Mir-190-P1-3pS	STAR		588	cfa-Mir-190-P1	588		0		0		0		0		0		0		0	0	1	0	0	0	0	2	4	2	0	89	5	1	2	0	6	256	2	2	2	0	1	1	0	5	0	1	4	46	6
cfa-Mir-190-P2-5p	MATURE		5268	cfa-Mir-190-P2	5268		0		0		0		0		0		0		6	6	7	6	3	4	31	102	95	66	88	418	32	4	10	18	63	1184	8	42	5	9	18	174	9	43	11	29	45	343	41
cfa-Mir-190-P2-3pS	STAR		4	cfa-Mir-190-P2	4		0		0		0		0		0		0		0	0	0	0	0	0	0	0	0	0	0	0	0	0	0	0	0	0	0	0	0	0	0	1	0	0	0	0	0	1	0
cfa-Mir-191-3pS	STAR	nucleotide difference	21525.5	cfa-Mir-191	21525.5		0		0		0		0		0		0		350	27	20	16	28	23	139	506	194	184	200	715	292	20	49	160	406	9714	26	78	26	21	17	254	16	76	7	51	39	1609	342
cfa-Mir-1911-5p	MATURE		3484	cfa-Mir-1911	3484		0		0		0		0		0		0		0	0	0	0	0	0	40	54	869	16	32	1435	0	0	1	0	0	559	0	0	4	0	0	0	0	1	0	0	0	351	0
cfa-Mir-1911-3pS	STAR	nucleotide difference	108	cfa-Mir-1911	108		0		0		0		0		0		0		0	0	0	0	0	0	1	4	19	2	1	33	0	0	0	0	0	20	0	0	0	0	0	0	0	0	0	0	0	12	0
cfa-Mir-1912-3p	MATURE	nucleotide difference	324	cfa-Mir-1912	324		0		0		0		0		0		0		0	0	0	0	0	0	6	12	21	13	13	31	0	0	0	0	0	148	0	0	0	1	0	0	0	0	0	0	0	72	0
cfa-Mir-1912-5pS	STAR	nucleotide difference	0	cfa-Mir-1912	0		0		0		0		0		0		0		0	0	0	0	0	0	0	0	0	0	0	0	0	0	0	0	0	0	0	0	0	0	0	0	0	0	0	0	0	0	0
cfa-Mir-192-P2-5p	MATURE		1166811	cfa-Mir-192-P2	1166811		0		0		0		0		0		0		5	2	1	1	2	2	0	100	41	16	57	77	11498	812	3278	944	12838	56	16903	298641	586	623	6680	34	12	157	7	52	46	12	131474
cfa-Mir-192-P2-3pS	STAR		48920.5	cfa-Mir-192-P2	48920.5		0		0		0		0		0		0		0	0	0	0	0	0	1	6	0	2	7	7	472	43	130	61	426	0	677	11430	33	55	342	0	0	9	0	5	1	0	6555
cfa-Mir-193-P2a-5pS	STAR		203	cfa-Mir-193-P2a	203		0		0		0		0		0		0		3	0	0	0	1	0	0	0	0	1	0	0	2	3	1	2	3	6	0	1	3	1	1	2	0	2	0	0	2	1	3
cfa-Mir-194-P1-3pS	STAR	nucleotide difference	2805	cfa-Mir-194-P1	2805		0		0		0		0		0		0		30	0	0	1	0	0	0	0	2	2	1	8	105	18	22	2	350	16	43	285	7	3	60	1	0	0	0	0	1	2	138
cfa-Mir-194-P2-3pS	STAR		847	cfa-Mir-194-P2	847		0		0		0		0		0		0		0	0	0	0	0	0	0	0	0	0	0	0	1	0	1	2	7	0	14	217	0	1	6	0	0	1	0	1	0	0	49
cfa-Mir-196-P1-3pS	STAR		61	cfa-Mir-196-P1	61		0		0		0		0		0		0		0	0	0	0	0	0	0	0	0	0	0	0	17	0	2	0	18	0	0	0	0	0	0	0	0	0	0	0	0	0	10
cfa-Mir-196-P2-3pS	STAR		355	cfa-Mir-196-P2	355		0		0		0		0		0		0		0	0	0	0	0	0	0	0	0	0	0	0	0	0	0	0	0	0	0	0	0	0	0	0	0	0	0	0	0	1	6
cfa-Mir-196-P3-3pS	STAR		203	cfa-Mir-196-P3	203		0		0		0		0		0		0		0	3	2	1	0	3	0	0	0	0	0	0	8	4	1	1	24	0	0	0	0	0	0	0	0	0	0	0	0	0	7
cfa-Mir-197-5pS	STAR		44.5	cfa-Mir-197	44.5		0		0		0		0		0		0		0	0	0	0	0	0	0	2	0	0	2	0	0	1	0	0	1	2	0	0	1	0	0	0	0	0	0	0	0	1	2
cfa-Mir-202-5p	MATURE		142951	cfa-Mir-202	142951		0		0		0		0		0		0		8	0	0	0	0	0	0	3	0	3	0	11	0	0	0	0	1	79	0	1	0	0	0	1	0	0	0	1	4	16	0
cfa-Mir-202-3pS	STAR		1119	cfa-Mir-202	1119		0		0		0		0		0		0		0	0	0	0	0	0	0	0	0	0	0	0	0	0	0	0	1	1	0	0	0	0	0	0	0	0	0	0	0	1	0
cfa-Mir-204-P1-3pS	STAR		978	cfa-Mir-204-P1	978		0		0		0		0		0		0		0	0	0	0	0	0	1	14	14	24	3	42	0	0	0	0	0	156	0	0	0	1	1	4	0	0	0	0	10	22	0
cfa-Mir-204-P2-5p	MATURE	nucleotide difference	2468	cfa-Mir-204-P2	2468		0		0		0		0		0		0		0	0	0	0	0	0	15	28	50	22	30	128	3	0	0	0	2	424	1	0	1	0	2	7	0	1	0	0	2	84	0
cfa-Mir-204-P2-3pS	STAR		0	cfa-Mir-204-P2	0		0		0		0		0		0		0		0	0	0	0	0	0	0	0	0	0	0	0	0	0	0	0	0	0	0	0	0	0	0	0	0	0	0	0	0	0	0
cfa-Mir-208-P1-3p	MATURE		1241	cfa-Mir-208-P1	1241		0		0		0		0		0		0		0	0	0	0	0	0	0	0	0	0	0	1	0	0	0	0	0	0	0	1	0	0	0	6	14	866	2	48	142	2	0
cfa-Mir-208-P1-5pS	STAR	nucleotide difference	84	cfa-Mir-208-P1	84		0		0		0		0		0		0		0	0	0	0	0	0	0	0	0	0	0	0	0	0	0	0	0	0	0	0	0	0	0	1	0	73	2	5	1	0	0
cfa-Mir-208-P2-5pS	STAR		99	cfa-Mir-208-P2	99		0		0		0		0		0		0		0	0	0	0	0	0	0	0	0	0	0	0	0	0	0	0	0	0	0	0	0	0	0	25	0	0	1	3	20	0	0
cfa-Mir-21-3pS	STAR	nucleotide difference	17632.3	cfa-Mir-21	17632.3		0		0		0		0		0		0		0	0	6	5	3	7	11	21	29	18	23	232	1030	195	175	518	930	969	43	1149	38	8	43	70	5	26	0	16	0	351	1949
cfa-Mir-210-5pS	STAR		1634	cfa-Mir-210	1634		0		0		0		0		0		0		1	0	0	0	0	0	8	26	5	8	14	43	16	2	4	22	28	489	0	1	1	0	0	65	6	25	5	8	1	98	30
cfa-Mir-2114-5p	MATURE		598	cfa-Mir-2114	598		0		0		0		0		0		0		0	0	0	0	0	0	0	4	0	0	1	17	2	0	1	0	4	92	1	5	0	0	1	1	0	0	0	0	0	48	11
cfa-Mir-2114-3pS	STAR		305	cfa-Mir-2114	305		0		0		0		0		0		0		0	0	0	0	0	0	0	4	4	0	2	9	1	0	1	2	3	48	0	6	0	0	0	2	0	0	0	0	0	23	6
cfa-Mir-216-P1a-5p	MATURE		39902	cfa-Mir-216-P1a	39902		0		0		0		0		0		0		0	0	0	0	0	0	0	3	20	0	1	35	11	1	1	11	13	16	2	10	1	0	1	0	0	1	1	4	0	35	9
cfa-Mir-216-P1a-3pS	STAR		4570	cfa-Mir-216-P1a	4570		0		0		0		0		0		0		0	0	0	0	0	0	0	1	7	1	0	8	4	0	0	3	3	6	2	6	1	0	2	0	0	0	0	1	0	15	4
cfa-Mir-216-P1b-5p	MATURE		49302	cfa-Mir-216-P1b	49302		0		0		0		0		0		0		0	0	0	0	0	0	2	6	28	2	0	85	3	0	4	19	8	47	4	13	6	1	1	0	0	0	0	9	0	141	9
cfa-Mir-216-P1b-3pS	STAR		2201	cfa-Mir-216-P1b	2201		0		0		0		0		0		0		0	0	0	0	0	0	1	0	2	0	0	11	0	0	0	0	1	0	0	0	0	0	0	0	0	0	0	0	0	28	0
cfa-Mir-217-v1-5p	MATURE		6676	cfa-Mir-217-v1	6676		0		0		0		0		0		0		0	0	0	0	0	0	0	0	1	0	0	8	2	1	0	2	1	2	0	1	0	0	0	0	1	0	0	1	1	6	0
cfa-Mir-217-v1-3pS	STAR		732	cfa-Mir-217-v1	732		0		0		0		0		0		0		0	0	0	0	0	0	0	0	0	0	0	0	0	0	0	0	0	0	0	0.5	0	0	0	0	0	0	0	0	0	1.5	0
cfa-Mir-217-v2-5p	MATURE		31607	cfa-Mir-217-v2	31607		0		0		0		0		0		0		0	0	0	0	0	0	0	2	6	0	1	26	8	1	0	5	1	14	1	5	0	0	1	1	2	0	0	4	1	30	0
cfa-Mir-217-v2-3pS	STAR		2302	cfa-Mir-217-v2	2302		0		0		0		0		0		0		0	0	0	0	0	0	0	0	2	0	0	3	0	0	0	2	0	1	2	0.5	0	0	1	0	0	0	0	0	0	3.5	1
cfa-Mir-218-P1-3pS	STAR		190	cfa-Mir-218-P1	190		0		0		0		0		0		0		0	0	0	0	0	0	0	10	0	5	4	2	0	0	0	0	0	139	0	0	0	0	0	1	0	0	0	0	0	12	1
cfa-Mir-218-P2-3pS	STAR		178	cfa-Mir-218-P2	178		0		0		0		0		0		0		0	1	0	0	0	0	0	5	8	1	0	20	0	0	1	0	0	119	0	0	0	0	0	0	0	0	0	0	1	6	0
cfa-Mir-219-P1-5p	MATURE		8712	cfa-Mir-219-P1	8712		0		0		0		0		0		0		1	6	10	6	4	8	4	14	18	36	29	1173	4	1	1	0	54	5244	8	18	1	0	3	10	1	4	0	1	34	1026	24
cfa-Mir-219-P2-3p	MATURE		88476	cfa-Mir-219-P2	88476		0		0		0		0		0		0		0	0	0	0	0	0	151	961	316	1098	3535	5842	0	0	0	0	0	61539	0	0	0	0	0	0	0	1	0	1	2	14969	1
cfa-Mir-219-P2-5pS	STAR		23455.5	cfa-Mir-219-P2	23455.5		0		0		0		0		0		0		1	0	0	0.5	0.5	0	15.5	55	31.5	94	128	2849	0.5	0	0	0	2.5	16233	0.5	2.5	0	0	2	3	0	0.5	0.5	0	1.5	3947.5	5.5
cfa-Mir-219-P2-as-3p	STAR		31	cfa-Mir-219-P2-as	31		0		0		0		0		0		0		0	0	0	0	1	0	0	0	0	1	0	0	0	0	1	0	0	14	0	1	0	0	0	1	0	1	0	0	0	2	0
cfa-Mir-219-P2-as-5pS	STAR		18	cfa-Mir-219-P2-as	18		0		0		0		0		0		0		2	0	0	0	0	0	0	0	0	1	0	0	0	0	0	1	2	2	0	0	0	0	0	0	0	1	0	1	0	0	0
cfa-Mir-221-P2-5pS	STAR		159	cfa-Mir-221-P2	159		0		0		0		0		0		0		0	1	0	0	1	0	0	6	0	2	5	0	6	0	1	2	5	59	0	1	1	0	1	1	0	0	0	0	0	5	4
cfa-Mir-223-3p	MATURE		13173	cfa-Mir-223	13173		0		0		0		0		0		0		727	1066	1001	775	1076	674	3	5	4	1	0	19	62	6	15	22	78	85	6	37	6	2	3	42	2	5	0	3	86	24	287
cfa-Mir-223-5pS	STAR		530.1	cfa-Mir-223	530.1		0		0		0		0		0		0		1	22	22	25	39	18	0	0	0	0	0	0	0	0	0	1	4	2	0	1	0	0	0	3	0	0	0	0	11	1	7
cfa-Mir-23-P1-5pS	STAR		61	cfa-Mir-23-P1	61		0		0		0		0		0		0		1	0	0	0	0	0	0	0	0	0	0	1	3	0	0	0	0	1	0	0	0	0	0	14	0	0	2	0	1	1	0
cfa-Mir-23-P2-5pS	STAR		104	cfa-Mir-23-P2	104		0		0		0		0		0		0		0	0	0	0	0	0	0	2	0	0	0	1	0	0	0	0	1	21	0	0	0	0	0	7	0	0	0	0	13	2	0
cfa-Mir-2355-5p	MATURE		908	cfa-Mir-2355	908		0		0		0		0		0		0		0	0	1	1	1	0	3	9	7	4	4	53	14	2	2	11	12	279	3	4	1	1	2	23	2	4	0	5	21	52	27
cfa-Mir-2355-3pS	STAR		424	cfa-Mir-2355	424		0		0		0		0		0		0		3	0	1	0	2	0	1	0	1	0	3	10	5	0	0	6	0	44	0	2	0	0	0	4	0	1	0	0	29	9	1
cfa-Mir-2387-3pS	STAR	NOT IN HUMAN	988	cfa-Mir-2387	988		0		0		0		0		0		0		0	0	0	0	0	0	6	42	11	9	30	28	9	0	1	3	5	435	0	2	2	3	3	6	1	4	7	4	0	47	5
cfa-Mir-24-P2-5pS	STAR		2087	cfa-Mir-24-P2	2087		0		0		0		0		0		0		0	0	0	0	1	0	4	3	4	3	7	44	10	1	0	0	6	374	2	3	0	1	1	34	1	8	0	8	424	62	9
cfa-Mir-2483-5p	MATURE	NOT IN HUMAN	2799	cfa-Mir-2483	2799		0		0		0		0		0		0		0	0	0	0	0	0	12	26	116	41	9	980	20	0	3	0	15	1039	4	10	9	5	1	9	0	1	0	0	4	56	23
cfa-Mir-2483-3pS	STAR	NOT IN HUMAN	664	cfa-Mir-2483	664		0		0		0		0		0		0		0	0	0	0	0	0	0	13	70	7	8	145	3	0	1	0	2	277	0	5	3	3	0	1	0	0	0	0	1	46	7
cfa-Mir-26-P1-3pS	STAR		4380.5	cfa-Mir-26-P1	4380.5		0		0		0		0		0		0		100	0	0	2	5	1	15	65	38	18	31	142	43	5	10	49	112	790	11	31	14	8	20	176	19	44	12	44	27	196	80
cfa-Mir-26-P2-3pS	STAR		1539	cfa-Mir-26-P2	1539		0		0		0		0		0		0		0	1	2	1	4	2	2	12	27	5	8	122	22	2	4	4	23	454	9	17	1	3	2	27	0	12	1	4	16	89	30
cfa-Mir-26-P3-3pS	STAR		227	cfa-Mir-26-P3	227		0		0		0		0		0		0		0	0	0	0	0	1	1	6	1	5	1	3	0	1	0	1	5	20	3	1	1	0	2	0	0	1	0	0	3	5	1
cfa-Mir-29-P1a-5pS	STAR		2457	cfa-Mir-29-P1a	2457		0		0		0		0		0		0		0	0	1	1	0	0	5	24	14	17	5	81	15	1	5	4	29	1127	5	17	1	0	1	31	4	7	0	11	23	116	31
cfa-Mir-29-P1b3-5pS	STAR		2496	cfa-Mir-29-P1b3	2496		0		0		0		0		0		0		5.5	0	0.5	0.5	0	0.5	11.5	37	17.5	33	11.5	64.5	5.5	1	0.5	5	8.5	529	1	2.5	4.5	1	2	216	32.5	44.5	16.5	97.5	155.5	29	18.5
cfa-Mir-29-P1b4-5pS	STAR		2496	cfa-Mir-29-P1b4	2496		0		0		0		0		0		0		5.5	0	0.5	0.5	0	0.5	11.5	37	17.5	33	11.5	64.5	5.5	1	0.5	5	8.5	529	1	2.5	4.5	1	2	216	32.5	44.5	16.5	97.5	155.5	29	18.5
cfa-Mir-29-P2b-v1-5pS	STAR		2855	cfa-Mir-29-P2b-v1	2855		0		0		0		0		0		0		18.5	0	0	0	0	2	12	63	26	52.5	21.5	105.5	10	2	3	1	16	931.5	2	3	5	4	3	34	4	16	7	19	322.5	115.5	15
cfa-Mir-29-P2b-v2-5pS	STAR		70	cfa-Mir-29-P2b-v2	70		0		0		0		0		0		0		1	0	0	0	0	0	0	1	0	2.5	0.5	2.5	1	0	0	0	0	24	0	0	0	0	0	0	0	0	0	0	4.5	0.5	0
cfa-Mir-296-5p	MATURE		1	cfa-Mir-296	1		0		0		0		0		0		0		0	0	0	0	0	0	0	0	0	0	0	0	0	0	0	0	0	0	0	0	0	0	0	0	0	0	0	0	0	0	0
cfa-Mir-296-3pS	STAR		6	cfa-Mir-296	6		0		0		0		0		0		0		0	0	0	0	0	0	0	0	0	0	0	0	0	0	0	0	0	3	0	0	0	0	0	0	0	0	0	0	0	1	0
cfa-Mir-30-P2b-3pS	STAR		12274.5	cfa-Mir-30-P2b	12274.5		0		0		0		0		0		0		172	4	4	3	4	1	71	269	205	96	134	340	192	18	39	108	196	1674	15	51	47	46	30	1082	56	249	50	185	391	589.5	218
cfa-Mir-30-P2c-3pS	STAR		1835	cfa-Mir-30-P2c	1835		0		0		0		0		0		0		5	0	2	0	2	0	7	20	3	14	10	13	7	2	0	4	16	223	1	5	2	1	1	117	3	17	8	29	228	33	11
cfa-Mir-3059-5p	MATURE		10485	cfa-Mir-3059	10485		0		0		0		0		0		0		0	0	0	0	0	0	111	324	29	127	166	147	0	0	0	0	2	8265	0	0	1	1	1	1	0	0	0	0	1	1212	0
cfa-Mir-3059-3pS	STAR		27	cfa-Mir-3059	27		0		0		0		0		0		0		0	0	0	0	0	0	1	1	0	0	1	0	0	0	0	0	0	22	0	0	0	0	0	0	0	0	0	0	0	2	0
cfa-Mir-3085-3p	MATURE		630	cfa-Mir-3085	630		0		0		0		0		0		0		0	0	0	0	0	0	3	11	3	3	2	13	0	0	0	0	0	571	1	0	0	0	0	0	0	0	0	0	0	19	0
cfa-Mir-3085-5pS	STAR	nucleotide difference	81	cfa-Mir-3085	81		0		0		0		0		0		0		0	0	0	0	0	0	0	3	0	0	1	8	0	0	0	0	0	54	0	0	0	0	0	0	0	0	0	0	0	6	0
cfa-Mir-31-3pS	STAR		856	cfa-Mir-31	856		0		0		0		0		0		0		0	0	0	0	0	0	0	3	1	3	0	21	3	1	2	3	22	51	18	37	4	0	5	17	3	2	1	5	33	14	16
cfa-Mir-32-5p	MATURE		22900	cfa-Mir-32	22900		0		0		0		0		0		0		1	10	7	6	10	9	8	19	9	5	1	98	50	8	7	13	64	472	16	66	3	0	4	33	2	8	1	6	506	165	104
cfa-Mir-324-5p	MATURE		6121	cfa-Mir-324	6121		0		0		0		0		0		0		154	3	5	4	2	7	47	191	52	117	61	300	94	17	14	40	142	2336	13	91	12	15	17	12	2	17	2	3	29	255	242
cfa-Mir-325-3p	MATURE	nucleotide difference	2479	cfa-Mir-325	2479		0		0		0		0		0		0		0	0	0	0	0	0	34	73	26	63	41	174	1	0	1	0	0	1701	0	0	0	2	0	3	0	0	0	0	0	331	0
cfa-Mir-325-5pS	STAR		1047	cfa-Mir-325	1047		0		0		0		0		0		0		0	0	0	0	0	0	10	42	9	38	27	74	0	0	0	0	0	712	0	1	0	0	1	0	0	0	0	0	2	119	0
cfa-Mir-326-5pS	STAR		12	cfa-Mir-326	12		0		0		0		0		0		0		0	0	0	0	0	0	0	0	0	0	0	1	1	0	0	0	1	3	0	1	0	0	0	0	0	0	0	0	0	0	0
cfa-Mir-328-5pS	STAR	nucleotide difference	42	cfa-Mir-328	42		0		0		0		0		0		0		0	0	0	0	0	0	1	2	1	0	0	2	0	0	0	0	0	30	0	0	0	0	0	0	1	0	0	1	0	2	0
cfa-Mir-33-P1-3pS	STAR		715	cfa-Mir-33-P1	715		0		0		0		0		0		0		1	0	1	0	0	0	3	5	9	8	3	28	3	3	1	5	11	161	0	10	0	1	0	5	0	4	0	2	11	18	25
cfa-Mir-33-P2-5p	MATURE		2378	cfa-Mir-33-P2	2378		0		0		0		0		0		0		0	5	6	3	0	5	6	9	7	5	8	8	26	4	8	7	31	300	7	153	5	4	7	20	1	8	0	1	0	20	62
cfa-Mir-33-P2-3p	MATURE		243	cfa-Mir-33-P2	243		0		0		0		0		0		0		0	0	0	0	0	0	0	3	0	0	0	0	4	0	1	0	9	7	0	8	0	1	1	1	0	1	0	1	0	1	7
cfa-Mir-330-v1-3p	MATURE		6940	cfa-Mir-330-v1	6940		0		0		0		0		0		0		97	0	1	0	0	0	46	220	94	114	112	516	14	1	2	14	12	3523	2	10	4	3	3	24	0	2	0	0	193	1042	26
cfa-Mir-330-v1-5pS	STAR		18309	cfa-Mir-330-v1	18309		0		0		0		0		0		0		40	1	0	0.5	2	1.5	70	265	210.5	105.5	100.5	1943.5	33.5	3.5	7	21	42.5	11310	3	18.5	4.5	3	2	40	1	6	0.5	1	10.5	3360.5	69
cfa-Mir-330-v2-3p	MATURE		6940	cfa-Mir-330-v2	6940		0		0		0		0		0		0		97	0	1	0	0	0	46	220	94	114	112	516	14	1	2	14	12	3523	2	10	4	3	3	24	0	2	0	0	193	1042	26
cfa-Mir-330-v2-5pS	STAR		18309	cfa-Mir-330-v2	18309		0		0		0		0		0		0		40	1	0	0.5	2	1.5	70	265	210.5	105.5	100.5	1943.5	33.5	3.5	7	21	42.5	11310	3	18.5	4.5	3	2	40	1	6	0.5	1	10.5	3360.5	69
cfa-Mir-335-5p	MATURE		84972	cfa-Mir-335	84972		0		0		0		0		0		0		0	1	1	1	1	1	404	878	572	694	399	7431	36	6	5	4	56	54260	3	17	21	8	3	121	6	29	2	14	1229	15441	21
cfa-Mir-335-3pS	STAR		34472	cfa-Mir-335	34472		0		0		0		0		0		0		1	3	3	2	3	0	456	1216	430	673	504	1929	57	4	15	17	110	20613	4	14	10	9	5	137	6	18	7	21	164	5934	64
cfa-Mir-338-P1-3p	MATURE		288835	cfa-Mir-338-P1	288835		0		0		0		0		0		0		0	5	6	8	10	6	499	1804	2485	1351	2984	33117	380	36	47	77	162	164855	31	63	65	77	82	1505	64	439	18	220	240	60645	262
cfa-Mir-338-P1-as-5p	STAR		679	cfa-Mir-338-P1-as	679		0		0		0		0		0		0		0	0	0	0	0	0	0	11	45	5	7	233	0	0	0	0	0	129	0	1	0	0	0	2	0	0	0	1	2	54	0
cfa-Mir-338-P1-as-3pS	STAR	nucleotide difference	136	cfa-Mir-338-P1-as	136		0		0		0		0		0		0		0	0	0	0	0	0	0	2	17	1	0	39	0	0	0	0	0	40	0	0	0	0	0	1	0	1	0	1	1	9	0
cfa-Mir-339-3pS	STAR		844	cfa-Mir-339	844		0		0		0		0		0		0		61	0	4	1	0	2	1	7	11	0	0	27	9	3	0	13	26	109	2	15	0	0	1	11	1	3	0	2	9	27	22
cfa-Mir-34-P1-3pS	STAR		199	cfa-Mir-34-P1	199		0		0		0		0		0		0		0	0	0	0	1	0	0	2	2	2	0	31	0	0	0	0	4	48	0	1	0	0	0	0	0	1	0	1	10	21	4
cfa-Mir-34-P2a-v1-5p	MATURE		23198	cfa-Mir-34-P2a-v1	23198		0		0		0		0		0		0		0	0	0	0	0	1	0	7	126	0	11	293	5	1	2	0	7	182	0	3	0	0	0	0	0	0	0	0	2	285	8
cfa-Mir-34-P2a-v1-3pS	STAR		5776	cfa-Mir-34-P2a-v1	5776		0		0		0		0		0		0		0	0.5	0	0	0	0	0	13.5	36	1	21.5	62	7.5	1.5	0.5	0.5	5	84	0.5	4.5	4	3	0	0.5	0	0	0	1	0	93.5	3.5
cfa-Mir-34-P2a-v2-3p	MATURE		3413	cfa-Mir-34-P2a-v2	3413		0		0		0		0		0		0		0	0	0	0	0	0	0	8	22	1	12	37	6	2	0	0	5	48	0	4	1	1	0	0	0	0	0	0	0	52	2
cfa-Mir-34-P2a-v2-5pS	STAR	nucleotide difference	16446	cfa-Mir-34-P2a-v2	16446		0		0		0		0		0		0		0.333333	0.5	0	0.5	0	0	0	7	108.333	0	9.33333	247.333	3	1	0.5	0	5.66667	144.5	0.5	3.16667	0	0	0.5	0	0	0	0.5	0.5	1.66667	231.667	6.66667
cfa-Mir-34-P2b-5p	MATURE		523328	cfa-Mir-34-P2b	523328		0		0		0		0		0		0		9	2	3	3	0	1	42	440	4050	30	374	11189	215	25	54	13	108	7889	31	67	6	7	14	17	1	5	0	56	30	15159	134
cfa-Mir-34-P2b-3pS	STAR		2238	cfa-Mir-34-P2b	2238		0		0		0		0		0		0		0	0	0	0	0	0	0	16	64	1	13	116	6	1	2	0	3	57	0	1	0	2	0	0	0	0	0	1	0	181	4
cfa-Mir-34-P3a-5p	MATURE	nucleotide difference	28681	cfa-Mir-34-P3a	28681		0		0		0		0		0		0		0	0	0	0	0	0	0	18	90	1	9	519	6	1	1	2	9	130	0	5	2	1	1	1	1	1	0	1	3	120	5
cfa-Mir-34-P3a-3pS	STAR		146	cfa-Mir-34-P3a	146		0		0		0		0		0		0		0	0	0	0	0	0	0	0	0	0	0	0	0	0	0	0	0	0	0	0	0	0	0	0	0	0	0	0	0	0	0
cfa-Mir-34-P3b-5p	MATURE		1031	cfa-Mir-34-P3b	1031		0		0		0		0		0		0		0	0	0	0	0	0	0	0	13	0	3	41	0	0	0	2	0	12	0	0	0	1	0	0	0	0	0	0	0	12	2
cfa-Mir-34-P3b-3pS	STAR		0	cfa-Mir-34-P3b	0		0		0		0		0		0		0		0	0	0	0	0	0	0	0	0	0	0	0	0	0	0	0	0	0	0	0	0	0	0	0	0	0	0	0	0	0	0
cfa-Mir-340-3pS	STAR		15705	cfa-Mir-340	15705		0		0		0		0		0		0		405	2	4	3	1	2	69	155	94	95	91	912	53	3	7	40	74	8854	4	25	7	4	3	46	7	20	1	16	179	1469	65
cfa-Mir-342-5pS	STAR		3134.5	cfa-Mir-342	3134.5		0		0		0		0		0		0		12	0	2	0	1	1	30	127	26	93	72	41	25	3	6	104	58	1433	8	99	4	0	5	15	0	4	1	9	4	200	63
cfa-Mir-345-5p	MATURE	nucleotide difference	1551	cfa-Mir-345	1551		0		0		0		0		0		0		0	0	0	0	0	0	3	20	11	4	4	48	8	0	1	5	5	794	2	8	2	0	1	13	1	1	0	1	19	77	23
cfa-Mir-345-3pS	STAR		580	cfa-Mir-345	580		0		0		0		0		0		0		4	7	2	2	3	5	1	6	4	15	3	13	9	1	3	5	11	242	1	7	1	0	2	7	1	2	0	2	5	21	14
cfa-Mir-346-5p	MATURE		2110	cfa-Mir-346	2110		0		0		0		0		0		0		0	0	0	0	0	0	16	89	12	61	52	80	0	0	0	0	0	1441	0	0	0	0	0	0	0	0	0	0	0	347	0
cfa-Mir-346-3pS	STAR		13	cfa-Mir-346	13		0		0		0		0		0		0		0	0	0	0	0	0	0	0	0	1	1	2	0	0	0	0	0	8	0	0	0	0	0	0	0	0	0	0	0	1	0
cfa-Mir-350-3p	MATURE	NOT IN HUMAN	4366	cfa-Mir-350	4366		0		0		0		0		0		0		212	2	3	4	11	7	8	32	14	103	12	62	21	5	4	24	84	703	11	61	7	1	18	42	2	20	3	11	122	167	56
cfa-Mir-350-5pS	STAR	NOT IN HUMAN	2496	cfa-Mir-350	2496		0		0		0		0		0		0		42	1	0	1	1	0	16	101	29	44	40	87	8	0	3	34	30	1073	2	9	4	2	2	39	1	18	3	9	5	155	38
cfa-Mir-361-v2-5pS	STAR		342.833	cfa-Mir-361-v2	342.833		0		0		0		0		0		0		4.5	0	0	1	0	0	1	6	6	5	6.5	18	2	1	1	2	5.5	84	1	4.5	0.5	2	0	6.5	0	2	1	1.5	7	23	5
cfa-Mir-362-P1-3pS	STAR		2375.5	cfa-Mir-362-P1	2375.5		0		0		0		0		0		0		0	2	1	2	2	1	3	7	2	0	1	49	10	3	2	3	17	126	0	12	1	1	1	8	0	0	0	4	19	47	30
cfa-Mir-362-P2-v1-5p	MATURE		5310	cfa-Mir-362-P2-v1	5310		0		0		0		0		0		0		38	4	0	2	4	2	6	26	8	32	10	68	24	5	4	11	46	267	8	28	4	5	8	29	2	6	4	6	88	94	29
cfa-Mir-362-P2-v2-5pS	STAR		35	cfa-Mir-362-P2-v2	35		0		0		0		0		0		0		0.666667	0	0	0	0	0	0	1.33333	0	0.333333	0	0	0.333333	0.333333	0	0.333333	0.666667	1.66667	0	0	0	0	0	0	0	0	0	0	0	0.666667	0
cfa-Mir-362-P4-5pS	STAR		1532	cfa-Mir-362-P4	1532		0		0		0		0		0		0		2	2	0	3	5	5	2	6	9	22	3	65	16	3	1	3	25	231	11	14	0	1	8	17	0	2	0	2	10	73	25
cfa-Mir-362-P5-5p	MATURE		5313	cfa-Mir-362-P5	5313		0		0		0		0		0		0		38	4	0	2	4	2	6	26	8	32	10	68	24	5	4	11	46	267	8	28	4	5	8	29	2	6	4	6	88	94	29
cfa-Mir-362-P5-3pS	STAR		2559.33	cfa-Mir-362-P5	2559.33		0		0		0		0		0		0		17	1	0	0	0	0	0	5.5	4.5	8.5	3	96.9167	2	0	0	1	4.25	43.5	1.25	7.83333	0.25	1.25	0.5	1	0	0.5	0	0	28.25	223.417	3.25
cfa-Mir-370-5pS	STAR		277	cfa-Mir-370	277		0		0		0		0		0		0		0	0	0	0	0	0	4	13	5	9	2	12	1	0	0	0	0	184	0	0	0	0	1	1	0	0	0	0	0	32	0
cfa-Mir-374-P2-3pS	STAR		3699	cfa-Mir-374-P2	3699		0		0		0		0		0		0		1	1	1	0	1	3	7	34	21	12	13	175	29	5	9	7	22	1245	2	9	3	2	1	71	5	22	3	15	139	313	47
cfa-Mir-375-5pS	STAR		22	cfa-Mir-375	22		0		0		0		0		0		0		0	0	0	0	0	0	0	0	0	0	0	0	0	0	0	0	2	0	0	0	0	0	1	0	0	0	0	0	0	6	0
cfa-Mir-376-P1-5p	MATURE		13874	cfa-Mir-376-P1	13874		0		0		0		0		0		0		0	0	0	0	0	0	36	148	58	42	29	344	2	0	0	0	7	11936	0	2	3	0	0	20	0	11	0	4	1	966	4
cfa-Mir-376-P1-3p	MATURE		1064	cfa-Mir-376-P1	1064		0		0		0		0		0		0		0	0	0	0	0	0	5	15	9	10	5	58	5	1	1	0	5	643	0	0	1	0	2	3	0	4	0	0	4	123	3
cfa-Mir-376-P2-3p	MATURE		1064	cfa-Mir-376-P2	1064		0		0		0		0		0		0		0	0	0	0	0	0	5	15	9	10	5	58	5	1	1	0	5	643	0	0	1	0	2	3	0	4	0	0	4	123	3
cfa-Mir-376-P2-5pS	STAR	nucleotide difference	363	cfa-Mir-376-P2	363		0		0		0		0		0		0		0	0	0	0	0	0	0	5.5	2	4	1	8	1	0	0	0	0	203.5	0	0	0	0	2	0	0	0	0	1	5	24	0
cfa-Mir-376-P3-3p	MATURE		545	cfa-Mir-376-P3	545		0		0		0		0		0		0		0	0	0	0	0	0	9	5	3	2	4	41	1	0	0	0	1	372	0	0	0	1	0	1	0	0	0	0	0	56	0
cfa-Mir-376-P3-5pS	STAR		90.5	cfa-Mir-376-P3	90.5		0		0		0		0		0		0		0	0	0	0	0	0	0	0.5	0	0.5	0.5	7.5	0.5	0	0	0	0	57	0	0	0	0	0	0	0	0	0	0	0	7	0
cfa-Mir-376-P4-3p	MATURE		7177	cfa-Mir-376-P4	7177		0		0		0		0		0		0		0	0	0	0	0	1	36	102	87	88	39	796	30	5	4	3	31	4155	1	0	7	6	4	15	0	12	2	4	27	968	19
cfa-Mir-376-P4-5pS	STAR		92.5	cfa-Mir-376-P4	92.5		0		0		0		0		0		0		0	0	0	0	0	0	0	0.5	0	0.5	0.5	7.5	0.5	0	0	0	0	57	0	0	0	0	0	0	0	0	0	0	0	7	0
cfa-Mir-376-P5-3p	MATURE		1064	cfa-Mir-376-P5	1064		0		0		0		0		0		0		0	0	0	0	0	0	5	15	9	10	5	58	5	1	1	0	5	643	0	0	1	0	2	3	0	4	0	0	4	123	3
cfa-Mir-376-P5-5pS	STAR	nucleotide difference	0	cfa-Mir-376-P5	0		0		0		0		0		0		0		0	0	0	0	0	0	0	0	0	0	0	0	0	0	0	0	0	0	0	0	0	0	0	0	0	0	0	0	0	0	0
cfa-Mir-383-v1-5p	MATURE		17076	cfa-Mir-383-v1	17076		0		0		0		0		0		0		8	0	0	1	2	0	108	308	49	268	104	572	6	1	2	1	1	13676	1	2	2	2	2	2	0	0	0	0	1	1406	1
cfa-Mir-383-v1-3pS	STAR		186.167	cfa-Mir-383-v1	186.167		0		0		0		0		0		0		0	0.5	0	0	0	0	1	3.5	1	2.5	0.5	2.5	0	0	0	0	0	103	0	0	0.5	0	0	0	0	0	0	0	0	21.5	0
cfa-Mir-383-v2-5p	MATURE		22530	cfa-Mir-383-v2	22530		0		0		0		0		0		0		8	2	0	1	2	2	128	376	61	344	124	836	6	1	2	2	1	17883	1	2	3	4	2	2	0	2	0	0	2	2038	2
cfa-Mir-383-v2-3pS	STAR		186.167	cfa-Mir-383-v2	186.167		0		0		0		0		0		0		0	0.5	0	0	0	0	1	3.5	1	2.5	0.5	2.5	0	0	0	0	0	103	0	0	0.5	0	0	0	0	0	0	0	0	21.5	0
cfa-Mir-384-3p	MATURE	NOT IN HUMAN	978	cfa-Mir-384	978		0		0		0		0		0		0		0	0	0	0	0	0	8	11	4	29	10	49	2	0	0	0	2	652	1	0	0	0	0	0	0	1	0	0	3	150	1
cfa-Mir-384-5pS	STAR	NOT IN HUMAN	2661	cfa-Mir-384	2661		0		0		0		0		0		0		0	0	0	0	0	0	25	45	19	26	37	218	1	0	0	0	1	1742	0	0	0	0	1	2	0	0	0	0	1	445	2
cfa-Mir-430-P1-3p	MATURE	nucleotide difference	6	cfa-Mir-430-P1	6		0		0		0		0		0		0		0	0	0	0	0	0	0	0	0	0	0	1	0	0	0	0	0	0	0	0	0	0	0	0	0	0	0	0	0	0	0
cfa-Mir-430-P1-5pS	STAR		19	cfa-Mir-430-P1	19		0		0		0		0		0		0		0	0	0	0	0	0	0	0	0	0	0	1	0	0	0	0	0	3	0	0	0	0	0	0	0	0	0	0	0	0	0
cfa-Mir-430-P2-3p	MATURE		4	cfa-Mir-430-P2	4		0		0		0		0		0		0		0	0	0	0	0	0	0	0	0	0	0	0	1	0	0	0	0	0	0	0	0	0	0	0	0	0	0	0	0	0	0
cfa-Mir-430-P2-5pS	STAR	nucleotide difference	0	cfa-Mir-430-P2	0		0		0		0		0		0		0		0	0	0	0	0	0	0	0	0	0	0	0	0	0	0	0	0	0	0	0	0	0	0	0	0	0	0	0	0	0	0
cfa-Mir-430-P3-3p	MATURE		0	cfa-Mir-430-P3	0		0		0		0		0		0		0		0	0	0	0	0	0	0	0	0	0	0	0	0	0	0	0	0	0	0	0	0	0	0	0	0	0	0	0	0	0	0
cfa-Mir-430-P3-5pS	STAR		0	cfa-Mir-430-P3	0		0		0		0		0		0		0		0	0	0	0	0	0	0	0	0	0	0	0	0	0	0	0	0	0	0	0	0	0	0	0	0	0	0	0	0	0	0
cfa-Mir-430-P4-3p	MATURE		5	cfa-Mir-430-P4	5		0		0		0		0		0		0		0	0	0	0	0	0	0	0	0	0	0	0	0	0	0	0	0	0	0	0	0	0	0	0	0	0	0	0	0	0	0
cfa-Mir-430-P4-5pS	STAR		0	cfa-Mir-430-P4	0		0		0		0		0		0		0		0	0	0	0	0	0	0	0	0	0	0	0	0	0	0	0	0	0	0	0	0	0	0	0	0	0	0	0	0	0	0
cfa-Mir-430-P5d1-5p	MATURE		560	cfa-Mir-430-P5d1	560		0		0		0		0		0		0		10	1	2	2	1	2	4	6	1	2	0	4	5	0	1	15	12	191	0	1	2	0	0	10	0	0	0	1	0	20	8
cfa-Mir-430-P5d1-3p	MATURE		100	cfa-Mir-430-P5d1	100		0		0		0		0		0		0		8	1	0	1	0	0	0	2	0	1	0	0	0	0	0	2	2	22	0	0	0	0	0	1	0	0	0	0	0	0	2
cfa-Mir-430-P5d2-5p	MATURE		560	cfa-Mir-430-P5d2	560		0		0		0		0		0		0		10	1	2	2	1	2	4	6	1	2	0	4	5	0	1	15	12	191	0	1	2	0	0	10	0	0	0	1	0	20	8
cfa-Mir-430-P5d2-3p	MATURE		100	cfa-Mir-430-P5d2	100		0		0		0		0		0		0		8	1	0	1	0	0	0	2	0	1	0	0	0	0	0	2	2	22	0	0	0	0	0	1	0	0	0	0	0	0	2
cfa-Mir-430-P7d1-3p	MATURE	NOT IN HUMAN	6	cfa-Mir-430-P7d1	6		0		0		0		0		0		0		0	0	0	0	0	0	0	0	0	0	0	0	0	0	0	0	0	0	0	0	0	0	0	0	0	0	0	0	0	0	0
cfa-Mir-430-P7d1-5pS	STAR	NOT IN HUMAN	1	cfa-Mir-430-P7d1	1		0		0		0		0		0		0		0	0	0	0	0	0	0	0	0	0	0	0	0	0	0	0	0	0	0	0	0	0	0	0	0	0	0	0	0	0	0
cfa-Mir-430-P7d2-3p	MATURE	NOT IN HUMAN	6	cfa-Mir-430-P7d2	6		0		0		0		0		0		0		0	0	0	0	0	0	0	0	0	0	0	0	0	0	0	0	0	0	0	0	0	0	0	0	0	0	0	0	0	0	0
cfa-Mir-430-P7d2-5pS	STAR	NOT IN HUMAN	1	cfa-Mir-430-P7d2	1		0		0		0		0		0		0		0	0	0	0	0	0	0	0	0	0	0	0	0	0	0	0	0	0	0	0	0	0	0	0	0	0	0	0	0	0	0
cfa-Mir-431-5p	MATURE		3221	cfa-Mir-431	3221		0		0		0		0		0		0		0	0	0	0	0	0	56	168	13	62	42	42	5	0	0	1	2	2597	0	0	0	1	0	5	0	1	0	0	0	158	0
cfa-Mir-431-3pS	STAR		9153	cfa-Mir-431	9153		0		0		0		0		0		0		0	0	0	0	0	0	133	440	104	206	177	439	2	0	1	0	6	6433	0	0	2	0	0	1	0	5	1	1	1	1138	3
cfa-Mir-432-3pS	STAR		1011	cfa-Mir-432	1011		0		0		0		0		0		0		0	0	0	0	0	0	4	33	3	59	14	39	2	0	0	0	1	705	0	0	3	0	0	0	1	0	0	1	0	132	0
cfa-Mir-433-3p	MATURE		28917	cfa-Mir-433	28917		0		0		0		0		0		0		0	0	0	0	0	0	399	1500	202	1242	904	602	7	1	1	0	4	19994	0	0	9	8	1	5	0	4	2	1	22	3583	3
cfa-Mir-433-5pS	STAR		1949	cfa-Mir-433	1949		0		0		0		0		0		0		0	0	0	0	0	0	26	72	17	38	26	49	2	0	0	0	0	1427	0	0	0	1	0	0	0	1	0	0	0	279	0
cfa-Mir-448-3p	MATURE		498	cfa-Mir-448	498		0		0		0		0		0		0		0	0	0	0	0	0	4	21	6	10	8	12	0	0	0	0	0	380	0	0	0	0	0	0	0	0	0	0	0	56	0
cfa-Mir-448-5pS	STAR		440	cfa-Mir-448	440		0		0		0		0		0		0		0	0	0	0	0	0	2	9	4	46	22	11	0	0	0	0	0	315	0	0	0	0	0	0	0	0	0	0	0	31	0
cfa-Mir-450-P1-5p	MATURE		31083	cfa-Mir-450-P1	31083		0		0		0		0		0		0		4	8	4	6	14	6	5	29	2	16	20	57	20	2	2	4	33	660	12	60	1	0	2	52	3	8	1	10	228	302	28
cfa-Mir-450-P1-3pS	STAR		190	cfa-Mir-450-P1	190		0		0		0		0		0		0		0	0	0	0	0	0	0	0	0	0	0	0	0	0	0	0	0	5	0	0	0	0	1	0	0	0	0	0	0	1	1
cfa-Mir-450-P2-5p	MATURE		31378	cfa-Mir-450-P2	31378		0		0		0		0		0		0		4	8	4	6	14	6	5	29	2	17	20	59	22	2	2	4	33	668	12	60	1	0	2	53	3	8	1	10	230	303	28
cfa-Mir-450-P2-3pS	STAR	nucleotide difference	565.5	cfa-Mir-450-P2	565.5		0		0		0		0		0		0		0	0	0	0	0	0	0	0	0	0	0	0	0	0	0	0	0	11	0	0	0	0	0	0	0	0	0	0	7	0	0
cfa-Mir-450-P3-3pS	STAR		187.5	cfa-Mir-450-P3	187.5		0		0		0		0		0		0		0	0	0	0	0	0	0	1	0	0	0	0	0	0	0	0	0	1	1	1	0	0	0	0	0	0	0	0	1	1	0
cfa-Mir-452-v1-3p	MATURE		9053	cfa-Mir-452-v1	9053		0		0		0		0		0		0		0	0	0	0	0	0	4	34	10	2	4	86	45	10	5	5	58	372	10	28	0	2	2	64	3	14	2	26	496	150	77
cfa-Mir-452-v2-3pS	STAR		1041.75	cfa-Mir-452-v2	1041.75		0		0		0		0		0		0		0	0	0	0	0	0.5	1	4.5	1.5	0	0.5	16.5	9	1.5	1	1	8.5	34.5	1.5	3.5	0.5	0	0.5	4.5	0	2	0	3	31.5	22	16
cfa-Mir-455-3pS	STAR		1780	cfa-Mir-455	1780		0		0		0		0		0		0		0	0	0	0	0	0	1	13	11	3	5	18	12	0	2	3	19	54	1	15	4	1	2	8	0	0	0	2	39	11	33
cfa-Mir-459-5p	MATURE		31750	cfa-Mir-459	31750		0		0		0		0		0		0		0	0	0	0	0	0	0	3	0	0	0	4	3	0	0	9	2	0	294	2056	0	2	53	0	2	0	1	3	0	2	642
cfa-Mir-459-3pS	STAR		2509	cfa-Mir-459	2509		0		0		0		0		0		0		0	0	0	0	0	0	0	0	0	0	0	0	0	0	0	2	2	0	25	202	0	0	5	0	0	1	0	0	0	0	39
cfa-Mir-483-5pS	STAR		567	cfa-Mir-483	567		0		0		0		0		0		0		0	0	0	0	0	0	0	1	1	0	0	0	0	0	0	0	2	6	0	0	0	1	0	2	0	1	0	0	1	1	0
cfa-Mir-488-3p	MATURE		4318	cfa-Mir-488	4318		0		0		0		0		0		0		0	0	0	0	0	0	46	146	39	83	64	251	4	0	1	0	7	3131	1	0	2	0	0	2	0	0	0	0	0	354	12
cfa-Mir-488-5pS	STAR		939	cfa-Mir-488	939		0		0		0		0		0		0		0	0	0	0	0	0	10	16	9	15	17	114	0	0	0	0	0	370	0	0	0	0	0	0	0	0	0	0	0	338	0
cfa-Mir-489-3p	MATURE	nucleotide difference	430	cfa-Mir-489	430		0		0		0		0		0		0		0	0	0	0	0	0	0	1	0	2	3	9	0	0	0	0	0	66	0	0	0	0	0	0	0	0	0	0	0	311	0
cfa-Mir-489-5pS	STAR		0	cfa-Mir-489	0		0		0		0		0		0		0		0	0	0	0	0	0	0	0	0	0	0	0	0	0	0	0	0	0	0	0	0	0	0	0	0	0	0	0	0	0	0
cfa-Mir-490-3p	MATURE		16666	cfa-Mir-490	16666		0		0		0		0		0		0		0	0	0	1	1	2	55	350	66	177	242	279	134	12	21	10	59	7286	15	21	52	40	8	666	77	421	34	397	1366	2415	246
cfa-Mir-490-5pS	STAR		647	cfa-Mir-490	647		0		0		0		0		0		0		0	0	1	0	0	0	5	41	2	39	38	7	12	6	0	0	4	200	2	5	4	7	1	4	0	3	2	5	19	101	13
cfa-Mir-491-5p	MATURE		1538	cfa-Mir-491	1538		0		0		0		0		0		0		308	1	0	1	0	2	11	36	18	61	16	31	3	0	0	0	6	363	3	4	4	2	3	8	1	1	1	3	19	69	7
cfa-Mir-491-3pS	STAR		245	cfa-Mir-491	245		0		0		0		0		0		0		2	0	0	0	0	0	3	6	0	6	1	15	0	0	0	0	3	126	0	1	0	0	0	1	0	0	0	1	0	27	0
cfa-Mir-493-5p	MATURE		1461	cfa-Mir-493	1461		0		0		0		0		0		0		0	0	0	0	0	0	2	26	4	9	16	13	18	4	5	2	37	162	0	1	18	7	12	44	0	15	8	6	24	78	7
cfa-Mir-493-3p	MATURE		896	cfa-Mir-493	896		0		0		0		0		0		0		0	0	0	0	0	0	2	22	4	3	1	16	21	2	5	2	29	162	0	1	8	2	9	36	0	18	0	6	14	72	15
cfa-Mir-499-3pS	STAR		974.5	cfa-Mir-499	974.5		0		0		0		0		0		0		0	2	1	0	0	0	0	0	0	0	0	7	2	1	0	1	3	63	1	4	0	1	0	131	15	13	6	50	142	9	4
cfa-Mir-504-v1-3pS	STAR	nucleotide difference	35	cfa-Mir-504-v1	35		0		0		0		0		0		0		0	0	0	0	0	0	0	3	0	0.5	1.5	0	0	0	0	0	0	22	0	0	0	0	0	0	1	0	0	0	3	1	0
cfa-Mir-504-v2-5p	MATURE		4778	cfa-Mir-504-v2	4778		0		0		0		0		0		0		4	0	0	0	0	0	94	206	10	192	102	40	4	1	0	0	0	3435	0	0	2	1	2	18	4	2	2	8	55	422	2
cfa-Mir-504-v2-3pS	STAR		13	cfa-Mir-504-v2	13		0		0		0		0		0		0		0	0	0	0	0	0	0	1	0	0.5	0.5	0	0	0	0	0	0	9	0	0	0	0	0	0	0	0	0	0	0	1	0
cfa-Mir-505-v1-5pS	STAR		520	cfa-Mir-505-v1	520		0		0		0		0		0		0		163	0	0.5	0	0.5	0	4.5	13	3.5	2	7.5	2.5	2.5	0.5	0.5	6.5	4	65	0	1.5	0.5	1	1	9.5	1.5	0.5	0.5	2	5	22.5	5
cfa-Mir-505-v2-5pS	STAR		520	cfa-Mir-505-v2	520		0		0		0		0		0		0		163	0	0.5	0	0.5	0	4.5	13	3.5	2	7.5	2.5	2.5	0.5	0.5	6.5	4	65	0	1.5	0.5	1	1	9.5	1.5	0.5	0.5	2	5	22.5	5
cfa-Mir-506-P1-3p	MATURE	NOT IN HUMAN	5269	cfa-Mir-506-P1	5269		0		0		0		0		0		0		0	0	0	0	0	0	1	2	0	3	1	3	0	0	0	0	0	39	0	1	0	0	0	0	0	0	0	0	1	3	0
cfa-Mir-506-P1-5pS	STAR	NOT IN HUMAN	2963	cfa-Mir-506-P1	2963		0		0		0		0		0		0		1	0	0	0	0	0	0	4	0	2	1	0	0	0	0	0	0	77	0	1	0	0	0	1	0	0	0	3	1	10	4
cfa-Mir-506-P2d-3p	MATURE	NOT IN HUMAN	4376	cfa-Mir-506-P2d	4376		0		0		0		0		0		0		0	0	0	0	0	0	0	0	0	0	1	0	0	0	0	0	0	9	0	0	0	0	0	0	0	0	0	0	1	0	0
cfa-Mir-506-P2d-5pS	STAR	NOT IN HUMAN	10	cfa-Mir-506-P2d	10		0		0		0		0		0		0		0	0	0	0	0	0	0	0	0	0	0	0	0	0	0	0	0	0	0	0	0	0	0	0	0	0	0	0	0	0	0
cfa-Mir-506-P2e-3p	MATURE	NOT IN HUMAN	1518	cfa-Mir-506-P2e	1518		0		0		0		0		0		0		0	0	0	0	0	0	0	0	1	0	0	0	0	0	0	0	0	49	0	0	0	0	0	0	0	0	0	0	2	5	0
cfa-Mir-506-P2e-5pS	STAR	NOT IN HUMAN	11	cfa-Mir-506-P2e	11		0		0		0		0		0		0		0	0	0	0	0	0	0	0	0	0	0	0	0	0	0	0	0	0	0	0	0	0	0	0	0	0	0	0	0	0	0
cfa-Mir-506-P3a-3p	MATURE	NOT IN HUMAN	1722	cfa-Mir-506-P3a	1722		0		0		0		0		0		0		0	0	0	0	0	0	0	0	0	0	0	0	0	0	0	0	0	22	0	0	0	0	0	0	0	0	0	0	0	1	0
cfa-Mir-506-P3a-5pS	STAR	NOT IN HUMAN	425	cfa-Mir-506-P3a	425		0		0		0		0		0		0		0	0	0	0	0	0	0	1	0	0	0	0	0	0	0	0	0	12.5	0	0	0	0	0	0	0	0	0	0.5	0.5	2.5	0
cfa-Mir-506-P3b-3p	MATURE	NOT IN HUMAN	1722	cfa-Mir-506-P3b	1722		0		0		0		0		0		0		0	0	0	0	0	0	0	0	0	0	0	0	0	0	0	0	0	22	0	0	0	0	0	0	0	0	0	0	0	1	0
cfa-Mir-506-P3b-5pS	STAR	NOT IN HUMAN	223	cfa-Mir-506-P3b	223		0		0		0		0		0		0		0	0	0	0	0	0	0	1	0	0	0	0	0	0	0	0	0	6.5	0	0	0	0	0	0	0	0	0	0.5	0.5	0.5	0
cfa-Mir-506-P7-5p	MATURE		1274	cfa-Mir-506-P7	1274		0		0		0		0		0		0		0	0	0	0	0	0	0	0	0	0	0	1	0	0	0	0	0	9	0	0	0	0	0	0	0	0	0	0	0	0	0
cfa-Mir-506-P7-3pS	STAR	NOT IN HUMAN	484.5	cfa-Mir-506-P7	484.5		0		0		0		0		0		0		0	0	0	0	0	0	0	2	0	0	0	1	0	0	0	0	0	12	0	0	0	0	0	0	0	0	0	0	0	1	0
cfa-Mir-542-v1-3p	MATURE		41228	cfa-Mir-542-v1	41228		0		0		0		0		0		0		2	24	21	18	41	22	14	40	12	39	48	63	15	4	2	5	30	1082	14	72	1	1	4	52	3	14	1	15	844	195	40
cfa-Mir-542-v1-5pS	STAR		1567.5	cfa-Mir-542-v1	1567.5		0		0		0		0		0		0		0	3	2	1	1	1	5	19.5	4	6	15	14	3	0	0	1	4	244	0	10	0	0	0	17	1	4	0	9	4	59	4
cfa-Mir-542-v2-3p	MATURE		19425	cfa-Mir-542-v2	19425		0		0		0		0		0		0		0	4	3	5	10	6	4	15	4	8	14	18	5	2	2	2	10	247	6	28	0	0	2	18	2	4	0	5	376	54	20
cfa-Mir-542-v2-5pS	STAR		1.5	cfa-Mir-542-v2	1.5		0		0		0		0		0		0		0	0	0	0	0	0	0	0.5	0	0	0	0	0	0	0	0	0	0	0	0	0	0	0	0	0	0	0	0	0	0	0
cfa-Mir-544-P1-5p	MATURE	NOT IN HUMAN	526	cfa-Mir-544-P1	526		0		0		0		0		0		0		0	0	0	0	0	0	2	7	2	0	4	40	0	0	0	0	0	295	0	0	0	0	0	0	0	0	0	0	3	114	0
cfa-Mir-544-P1-3pS	STAR	NOT IN HUMAN	67	cfa-Mir-544-P1	67		0		0		0		0		0		0		0	0	0	0	0	0	0	0	0	0	0	4	0	0	0	0	0	53	0	0	0	0	0	0	0	0	0	0	0	8	0
cfa-Mir-544-P2-5p	MATURE	NOT IN HUMAN	1	cfa-Mir-544-P2	1		0		0		0		0		0		0		0	0	0	0	0	0	0	0	0	0	0	0	0	0	0	0	0	1	0	0	0	0	0	0	0	0	0	0	0	0	0
cfa-Mir-544-P2-3p	MATURE	NOT IN HUMAN	1	cfa-Mir-544-P2	1		0		0		0		0		0		0		0	0	0	0	0	0	0	0	0	0	0	0	0	0	0	0	0	0	0	0	0	0	0	0	0	0	0	0	0	0	0
cfa-Mir-551-P1-3p	MATURE		1906	cfa-Mir-551-P1	1906		0		0		0		0		0		0		0	1	1	0	0	0	1	16	7	2	2	36	3	1	4	2	5	341	2	5	2	0	0	6	1	4	1	0	5	49	19
cfa-Mir-551-P1-5pS	STAR		184	cfa-Mir-551-P1	184		0		0		0		0		0		0		0	0	0	0	0	0	0	0	1	2	2	3	0	0	0	0	3	9	0	0	0	0	1	0	0	0	0	1	0	5	1
cfa-Mir-551-P2-3p	MATURE		4776	cfa-Mir-551-P2	4776		0		0		0		0		0		0		0	0	0	0	0	0	26	89	6	46	13	58	0	0	0	0	0	4125	1	0	0	0	0	0	0	0	0	0	1	185	2
cfa-Mir-551-P2-5pS	STAR	nucleotide difference	481	cfa-Mir-551-P2	481		0		0		0		0		0		0		0	0	0	0	0	0	7	22	2	21	2	7	0	0	0	1	1	283	0	0	0	0	0	0	0	0	0	0	0	36	2
cfa-Mir-582-5p	MATURE		5691	cfa-Mir-582	5691		0		0		0		0		0		0		0	8	6	8	5	11	14	23	6	24	2	33	24	3	2	8	27	1106	10	46	4	0	7	30	3	9	0	18	125	114	45
cfa-Mir-582-3pS	STAR		3151	cfa-Mir-582	3151		0		0		0		0		0		0		0	2	0	0	1	0	7	36	13	21	7	34	12	2	4	4	11	1192	4	25	4	0	2	50	3	13	0	20	12	139	25
cfa-Mir-590-3p	MATURE		22860	cfa-Mir-590	22860		0		0		0		0		0		0		2	9	8	11	18	10	12	21	17	11	8	359	160	26	31	74	236	1862	35	273	4	1	6	62	4	32	0	14	1309	452	459
cfa-Mir-590-5pS	STAR	nucleotide difference	714	cfa-Mir-590	714		0		0		0		0		0		0		3	0	1	0	0	1	0	3	1	0	1	15	4	1	5	6	22	78	1	12	0	0	0	4	0	4	0	3	44	12	16
cfa-Mir-592-5p	MATURE		7256	cfa-Mir-592	7256		0		0		0		0		0		0		0	0	0	0	0	0	46	222	28	148	131	359	13	5	8	22	23	5014	1	2	0	2	0	25	0	0	0	4	4	718	12
cfa-Mir-592-3pS	STAR		4	cfa-Mir-592	4		0		0		0		0		0		0		0	0	0	0	0	0	0	1	0	0	0	0	0	0	0	0	0	1	0	0	0	0	0	0	0	0	0	0	0	2	0
cfa-Mir-599-5p	MATURE		87	cfa-Mir-599	87		0		0		0		0		0		0		0	0	0	0	0	0	0	0	0	0	0	0	0	0	0	1	4	0	0	1	0	0	0	1	0	0	0	0	2	0	0
cfa-Mir-599-3pS	STAR		1	cfa-Mir-599	1		0		0		0		0		0		0		0	0	0	0	0	0	0	0	0	0	0	0	0	0	0	0	0	0	0	0	0	0	0	0	0	0	0	0	0	0	0
cfa-Mir-628-5p	MATURE		47223	cfa-Mir-628	47223		0		0		0		0		0		0		2	18	21	9	24	14	407	1215	365	507	469	2006	86	7	9	53	46	32850	6	32	7	8	5	414	17	95	5	37	300	4692	110
cfa-Mir-628-3pS	STAR		11939.5	cfa-Mir-628	11939.5		0		0		0		0		0		0		9	5	3	3	14	4	119	325	94	176	164	433	18	2	7	33	19	7975	4	9	3	11	8	180	15	31	14	46	103	1028	32
cfa-Mir-652-5pS	STAR		3946.5	cfa-Mir-652	3946.5		0		0		0		0		0		0		3	0	0	4	5	2	1	9	5	11	1	76	22	0	1	5	37	262	2	25	2	0	2	33	1	7	2	13	674	163	28
cfa-Mir-6529-3pS	STAR	nucleotide difference	1001	cfa-Mir-6529	1001		0		0		0		0		0		0		92	0	0	0	2	0	14	41	7	67	18	18	7	1	0	15	9	366	0	6	0	0	5	19	1	3	0	9	8	60	9
cfa-Mir-653-5p	MATURE	nucleotide difference	626	cfa-Mir-653	626		0		0		0		0		0		0		0	0	0	0	0	0	0	0	0	0	2	9	0	0	0	0	0	38	0	0	0	0	0	1	0	0	0	0	0	555	0
cfa-Mir-653-3p	MATURE		56	cfa-Mir-653	56		0		0		0		0		0		0		0	0	0	0	0	0	0	0	0	0	0	3	0	0	0	0	0	8	0	0	0	0	0	0	0	0	0	0	1	32	0
cfa-Mir-671-3pS	STAR		4046	cfa-Mir-671	4046		0		0		0		0		0		0		123	1	1	0	0	1	39	203	46	81	113	145	54	4	12	72	60	1400	3	18	12	12	11	40	4	18	4	6	8	341	49
cfa-Mir-6715-5p	MATURE		100	cfa-Mir-6715	100		0		0		0		0		0		0		0	0	1	0	0	0	0	2	0	1	3	12	1	0	0	1	0	34	0	0	0	1	0	0	0	0	0	0	0	21	0
cfa-Mir-6715-3p	MATURE		37	cfa-Mir-6715	37		0		0		0		0		0		0		0	0	0	0	0	0	0	2	0	0	0	4	0	0	0	0	0	12	0	0	0	0	0	1	0	0	0	0	0	6	0
cfa-Mir-675-3p	MATURE		31	cfa-Mir-675	31		0		0		0		0		0		0		0	0	0	0	0	0	0	0	0	0	0	0	0	0	0	0	0	0	0	0	0	0	0	0	0	0	0	0	1	0	0
cfa-Mir-675-5pS	STAR		0	cfa-Mir-675	0		0		0		0		0		0		0		0	0	0	0	0	0	0	0	0	0	0	0	0	0	0	0	0	0	0	0	0	0	0	0	0	0	0	0	0	0	0
cfa-Mir-676-3p	MATURE		7094	cfa-Mir-676	7094		0		0		0		0		0		0		61	1	4	0	6	10	45	169	21	144	47	108	22	10	2	6	52	2525	22	49	22	17	42	98	5	46	6	28	134	236	32
cfa-Mir-7-P1-3pS	STAR		4403	cfa-Mir-7-P1	4403		0		0		0		0		0		0		12	1	1	3	7	0	11	72	137	73	36	657	78	9	9	42	148	983	6	77	7	4	12	17	3	7	0	8	48	216	122
cfa-Mir-7-P2-3pS	STAR		886	cfa-Mir-7-P2	886		0		0		0		0		0		0		0	0	0	0	0	0	13	35	1	26	14	3	0	0	0	0	2	419	0	0	0	0	0	0	0	0	0	0	0	305	3
cfa-Mir-7-P3-3pS	STAR		1048	cfa-Mir-7-P3	1048		0		0		0		0		0		0		0	0	0	0	0	0	4	55	3	53	7	5	0	0	1	0	6	542	0	3	3	0	0	0	0	0	0	0	0	339	0
cfa-Mir-7180-5pS	STAR	NOT IN HUMAN	180	cfa-Mir-7180	180		0		0		0		0		0		0		19	0	1	0	0	0	0	6	5	2	6	5	1	0	0	3	0	86	0	1	0	0	0	0	0	0	0	0	1	11	3
cfa-Mir-8-P1b-5pS	STAR		8948	cfa-Mir-8-P1b	8948		0		0		0		0		0		0		0	0	0	0	0	0	0	7	0	1	1	0	551	52	110	5	774	11	88	465	12	0	37	0	0	1	0	0	0	399	677
cfa-Mir-8-P2b-5pS	STAR		425	cfa-Mir-8-P2b	425		0		0		0		0		0		0		1	0	0	0	0	0	0	1	0	0	0	0	8	1	2	0	21	1	4	10	0	1	9	0	0	0	0	0	0	17	9
cfa-Mir-8-P3a-5pS	STAR		0	cfa-Mir-8-P3a	0		0		0		0		0		0		0		0	0	0	0	0	0	0	0	0	0	0	0	0	0	0	0	0	0	0	0	0	0	0	0	0	0	0	0	0	0	0
cfa-Mir-873-v1-5p	MATURE		6709	cfa-Mir-873-v1	6709		0		0		0		0		0		0		0	1	0	0	0	0	70	240	8	112	61	127	0	0	2	1	3	5098	0	2	2	1	0	2	0	2	0	0	0	650	3
cfa-Mir-873-v1-3pS	STAR		3749.5	cfa-Mir-873-v1	3749.5		0		0		0		0		0		0		0	0	0	0	0	0	101	292	9	169	181	60.5	0.5	0	0	2.5	0	2351	0	0.5	2.5	3	0	0	0	0	0	0	0	410.5	1.5
cfa-Mir-873-v2-5p	MATURE		3578	cfa-Mir-873-v2	3578		0		0		0		0		0		0		0	0	0	0	0	0	26	100	5	50	17	62	0	0	2	1	1	2848	0	0	2	0	0	0	0	0	0	0	0	336	2
cfa-Mir-873-v2-3pS	STAR		1851.5	cfa-Mir-873-v2	1851.5		0		0		0		0		0		0		0	0	0	0	0	0	60	148	4	101	98.5	29	0.5	0	0	1.5	0	1148	0	1	0.5	1	0	0	0	0	0	0	0	194.5	0.5
cfa-Mir-875-5p	MATURE		1	cfa-Mir-875	1		0		0		0		0		0		0		0	0	0	0	0	0	0	0	0	0	0	0	0	0	0	0	0	0	0	0	0	0	0	0	0	0	0	0	0	0	0
cfa-Mir-875-3pS	STAR		0	cfa-Mir-875	0		0		0		0		0		0		0		0	0	0	0	0	0	0	0	0	0	0	0	0	0	0	0	0	0	0	0	0	0	0	0	0	0	0	0	0	0	0
cfa-Mir-876-3p	MATURE		399	cfa-Mir-876	399		0		0		0		0		0		0		0	0	0	0	0	0	9	18	2	16	4	7	0	0	0	0	0	266	1	0	0	0	0	0	0	0	0	0	0	50	0
cfa-Mir-876-5pS	STAR		3	cfa-Mir-876	3		0		0		0		0		0		0		0	0	0	0	0	0	0	0	0	0	0	0	0	0	0	0	0	2	0	0	0	0	0	0	0	0	0	0	0	0	0
cfa-Mir-885-5p	MATURE		52706	cfa-Mir-885	52706		0		0		0		0		0		0		0	0	1	0	0	0	580	2254	1604	1792	413	5559	6	3	0	9	15	33154	56	295	4	3	34	6	0	3	1	3	4	1889	65
cfa-Mir-885-3pS	STAR		2137	cfa-Mir-885	2137		0		0		0		0		0		0		0	0	0	0	0	0	14	119	61	54	33	212	0	0	0	0	0	1154	1	10	0	0	1	0	0	2	0	0	0	114	1
cfa-Mir-8902-5p	MATURE	NOT IN HUMAN	253	cfa-Mir-8902	253		0		0		0		0		0		0		0	0	0	0	0	0	0	0	0	0	0	1	0	1	1	0	3	0	0	0	0	0	0	0	0	0	0	1	0	2	2
cfa-Mir-8902-3pS	STAR	NOT IN HUMAN	4	cfa-Mir-8902	4		0		0		0		0		0		0		0	0	0	0	0	0	0	0	0	0	0	0	0	0	0	0	0	0	0	0	0	0	0	0	0	0	0	0	0	0	0
cfa-Mir-8908-P1a1-3p	MATURE	NOT IN HUMAN	1771	cfa-Mir-8908-P1a1	1771		0		0		0		0		0		0		0	0	0	0	0	0	6	18	0	4	8	22	1	0	0	0	1	308	1	7	0	0	0	1	0	0	0	0	0	213	2
cfa-Mir-8908-P1a1-5pS	STAR	NOT IN HUMAN	501.9	cfa-Mir-8908-P1a1	501.9		0		0		0		0		0		0		0	0	0	0	0	0	1	2	0	0	0	4.66667	0.333333	0	0	0	0.333333	59	0.333333	1.33333	0	0	0	0	0	0	0	0	0	44.6667	0
cfa-Mir-8908-P1a2-3p	MATURE	NOT IN HUMAN	1771	cfa-Mir-8908-P1a2	1771		0		0		0		0		0		0		0	0	0	0	0	0	6	18	0	4	8	22	1	0	0	0	1	308	1	7	0	0	0	1	0	0	0	0	0	213	2
cfa-Mir-8908-P1a2-5pS	STAR	NOT IN HUMAN	501.9	cfa-Mir-8908-P1a2	501.9		0		0		0		0		0		0		0	0	0	0	0	0	1	2	0	0	0	4.66667	0.333333	0	0	0	0.333333	59	0.333333	1.33333	0	0	0	0	0	0	0	0	0	44.6667	0
cfa-Mir-8908-P1b-3p	MATURE	NOT IN HUMAN	1771	cfa-Mir-8908-P1b	1771		0		0		0		0		0		0		0	0	0	0	0	0	6	18	0	4	8	22	1	0	0	0	1	308	1	7	0	0	0	1	0	0	0	0	0	213	2
cfa-Mir-8908-P1b-5pS	STAR	NOT IN HUMAN	167.4	cfa-Mir-8908-P1b	167.4		0		0		0		0		0		0		0	0	0	0	0	0	0	1	0	2	0	0	0	0	0	0	0	28	0	0	0	0	0	0	0	0	0	0	0	28	0
cfa-Mir-8908-P1c-3p	MATURE	NOT IN HUMAN	1771	cfa-Mir-8908-P1c	1771		0		0		0		0		0		0		0	0	0	0	0	0	6	18	0	4	8	22	1	0	0	0	1	308	1	7	0	0	0	1	0	0	0	0	0	213	2
cfa-Mir-8908-P1c-5pS	STAR	NOT IN HUMAN	501.9	cfa-Mir-8908-P1c	501.9		0		0		0		0		0		0		0	0	0	0	0	0	1	2	0	0	0	4.66667	0.333333	0	0	0	0.333333	59	0.333333	1.33333	0	0	0	0	0	0	0	0	0	44.6667	0
cfa-Mir-8908-P1d-3p	MATURE	NOT IN HUMAN	2	cfa-Mir-8908-P1d	2		0		0		0		0		0		0		0	0	0	0	0	0	0	0	0	0	0	0	0	0	0	0	0	0	0	0	0	0	0	0	0	0	0	0	0	0	0
cfa-Mir-8908-P1d-5pS	STAR	NOT IN HUMAN	2.9	cfa-Mir-8908-P1d	2.9		0		0		0		0		0		0		0	0	0	0	0	0	0	0	0	0	0	0	0	0	0	0	0	0	0	0	0	0	0	0	0	0	0	0	0	0	0
cfa-Mir-8908-P2a-5p	MATURE	NOT IN HUMAN	1400	cfa-Mir-8908-P2a	1400		0		0		0		0		0		0		0	0	0	0	0	0	0	0	0	0	0	2	0	0	0	0	0	12	0	0	0	0	0	0	0	0	0	0	0	17	0
cfa-Mir-8908-P2a-3p	MATURE	NOT IN HUMAN	1487	cfa-Mir-8908-P2a	1487		0		0		0		0		0		0		0	0	0	0	0	0	0	0	0	0	0	2	0	0	0	0	0	20	0	2	0	0	0	0	0	0	0	0	0	26	0
cfa-Mir-8908-P2b-5p	MATURE	NOT IN HUMAN	1400	cfa-Mir-8908-P2b	1400		0		0		0		0		0		0		0	0	0	0	0	0	0	0	0	0	0	2	0	0	0	0	0	12	0	0	0	0	0	0	0	0	0	0	0	17	0
cfa-Mir-8908-P2b-3p	MATURE	NOT IN HUMAN	1487	cfa-Mir-8908-P2b	1487		0		0		0		0		0		0		0	0	0	0	0	0	0	0	0	0	0	2	0	0	0	0	0	20	0	2	0	0	0	0	0	0	0	0	0	26	0
cfa-Mir-8908-P3a-3p	MATURE	NOT IN HUMAN	313	cfa-Mir-8908-P3a	313		0		0		0		0		0		0		0	0	0	0	0	0	0	0	0	0	0	0	0	0	0	0	0	8	0	0	0	0	0	0	0	0	0	0	0	10	0
cfa-Mir-8908-P3a-5pS	STAR	NOT IN HUMAN	54	cfa-Mir-8908-P3a	54		0		0		0		0		0		0		0	0	0	0	0	0	0	0	0	0	0	0.5	0	0	0	0	0	0.5	0	0	0	0	0	0	0	0	0	0	0	1	0
cfa-Mir-8908-P3b-3p	MATURE	NOT IN HUMAN	313	cfa-Mir-8908-P3b	313		0		0		0		0		0		0		0	0	0	0	0	0	0	0	0	0	0	0	0	0	0	0	0	8	0	0	0	0	0	0	0	0	0	0	0	10	0
cfa-Mir-8908-P3b-5pS	STAR	NOT IN HUMAN	54	cfa-Mir-8908-P3b	54		0		0		0		0		0		0		0	0	0	0	0	0	0	0	0	0	0	0.5	0	0	0	0	0	0.5	0	0	0	0	0	0	0	0	0	0	0	1	0
cfa-Mir-8908-P4a1-3p	MATURE	NOT IN HUMAN	224	cfa-Mir-8908-P4a1	224		0		0		0		0		0		0		0	0	0	0	0	0	0	3	0	1	2	1	0	0	0	0	0	70	0	1	0	0	0	0	0	0	0	0	0	88	0
cfa-Mir-8908-P4a1-5pS	STAR	NOT IN HUMAN	4	cfa-Mir-8908-P4a1	4		0		0		0		0		0		0		0	0	0	0	0	0	0	0	0	0	0	0.333333	0	0	0	0	0	0.666667	0	0	0	0	0	0	0	0	0	0	0	1.33333	0
cfa-Mir-8908-P4a2-3p	MATURE	NOT IN HUMAN	224	cfa-Mir-8908-P4a2	224		0		0		0		0		0		0		0	0	0	0	0	0	0	3	0	1	2	1	0	0	0	0	0	70	0	1	0	0	0	0	0	0	0	0	0	88	0
cfa-Mir-8908-P4a2-5pS	STAR	NOT IN HUMAN	4	cfa-Mir-8908-P4a2	4		0		0		0		0		0		0		0	0	0	0	0	0	0	0	0	0	0	0.333333	0	0	0	0	0	0.666667	0	0	0	0	0	0	0	0	0	0	0	1.33333	0
cfa-Mir-8908-P4b-3p	MATURE	NOT IN HUMAN	224	cfa-Mir-8908-P4b	224		0		0		0		0		0		0		0	0	0	0	0	0	0	3	0	1	2	1	0	0	0	0	0	70	0	1	0	0	0	0	0	0	0	0	0	88	0
cfa-Mir-8908-P4b-5pS	STAR	NOT IN HUMAN	7.66667	cfa-Mir-8908-P4b	7.66667		0		0		0		0		0		0		0	0	0	0	0	0	0	0	0	0	0	0.333333	0	0	0	0	0	1.33333	0	0	0	0	0	0	0	0	0	0	0	3.33333	0
cfa-Mir-8908-P4c-3p	MATURE	NOT IN HUMAN	704	cfa-Mir-8908-P4c	704		0		0		0		0		0		0		0	0	0	0	0	0	3	8	0	2	4	3	0	0	0	0	1	178	1	2	0	0	0	0	0	0	0	0	0	208	0
cfa-Mir-8908-P4c-5pS	STAR	NOT IN HUMAN	0.333333	cfa-Mir-8908-P4c	0.333333		0		0		0		0		0		0		0	0	0	0	0	0	0	0	0	0	0	0	0	0	0	0	0	0.333333	0	0	0	0	0	0	0	0	0	0	0	0	0
cfa-Mir-8908-P5-5p	MATURE	NOT IN HUMAN	138	cfa-Mir-8908-P5	138		0		0		0		0		0		0		0	0	0	0	0	0	0	0	0	0	0	0	0	0	0	0	0	0	0	0	0	0	0	0	0	0	0	0	0	1	0
cfa-Mir-8908-P5-3p	MATURE	NOT IN HUMAN	150	cfa-Mir-8908-P5	150		0		0		0		0		0		0		0	0	0	0	0	0	0	0	0	0	0	0	0	0	0	0	0	0	0	0	0	0	0	0	0	0	0	0	0	0	0
cfa-Mir-8908-P6-3p	MATURE	NOT IN HUMAN	5263	cfa-Mir-8908-P6	5263		0		0		0		0		0		0		0	0	0	0	0	0	1	8	0	4	4	35	2	0	0	0	2	25	4	20	0	0	3	0	0	0	0	0	0	11	2
cfa-Mir-8908-P6-5pS	STAR	NOT IN HUMAN	89	cfa-Mir-8908-P6	89		0		0		0		0		0		0		0	0	0	0	0	0	0	1	0	1	0	1	0	0	0	0	0	1	0	1	0	0	0	0	0	0	0	0	0	0	0
cfa-Mir-8908-P7-3p	MATURE	NOT IN HUMAN	519	cfa-Mir-8908-P7	519		0		0		0		0		0		0		0	0	0	0	0	0	0	1	0	0	0	0	0	0	0	0	0	50	0	0	0	0	0	0	0	0	0	0	0	52	0
cfa-Mir-8908-P7-5pS	STAR	NOT IN HUMAN	5	cfa-Mir-8908-P7	5		0		0		0		0		0		0		0	0	0	0	0	0	0	0	0	0	0	0	0	0	0	0	0	0	0	0	0	0	0	0	0	0	0	0	0	0	0
cfa-Mir-8908-P8-5p	MATURE	NOT IN HUMAN	4723	cfa-Mir-8908-P8	4723		0		0		0		0		0		0		0	0	0	0	0	0	1	2	0	0	2	6	0	0	0	0	1	30	0	0	0	0	2	0	0	0	0	0	0	90	0
cfa-Mir-8908-P8-3p	MATURE	NOT IN HUMAN	35888	cfa-Mir-8908-P8	35888		0		0		0		0		0		0		0	0	0	0	0	0	4	7	2	10	5	38	0	0	1	1	2	185	1	5	1	0	3	1	0	0	0	0	0	191	1
cfa-Mir-9-P1-5p	MATURE		870866	cfa-Mir-9-P1	870866		0		0		0		0		0		0		60	1	2	0	2	0	10519	43016	29225	18230	17721	112795	105	21	20	25	94	563494	17	69	28	47	33	254	9	125	9	25	830	68548	91
cfa-Mir-9-P1-3p	MATURE		16477	cfa-Mir-9-P1	16477		0		0		0		0		0		0		1	0	0	0	0	0	167	422	319	313	187	2544	2	1	0	0	0	10028	0	1	1	0	0	4	0	1	0	0	25	2290	0
cfa-Mir-9-P2-5p	MATURE		870860	cfa-Mir-9-P2	870860		0		0		0		0		0		0		60	1	2	0	2	0	10519	43016	29224	18230	17721	112794	105	21	20	25	94	563491	17	69	28	47	33	254	9	125	9	25	830	68548	91
cfa-Mir-9-P2-3p	MATURE		16477	cfa-Mir-9-P2	16477		0		0		0		0		0		0		1	0	0	0	0	0	167	422	319	313	187	2544	2	1	0	0	0	10028	0	1	1	0	0	4	0	1	0	0	25	2290	0
cfa-Mir-9-P3-5p	MATURE		870916	cfa-Mir-9-P3	870916		0		0		0		0		0		0		60	1	2	0	2	0	10519	43020	29226	18230	17722	112800	105	21	20	25	94	563532	17	69	28	47	33	254	9	125	9	25	830	68550	91
cfa-Mir-9-P3-3p	MATURE		16477	cfa-Mir-9-P3	16477		0		0		0		0		0		0		1	0	0	0	0	0	167	422	319	313	187	2544	2	1	0	0	0	10028	0	1	1	0	0	4	0	1	0	0	25	2290	0
cfa-Mir-92-P1a-5pS	STAR		661	cfa-Mir-92-P1a	661		0		0		0		0		0		0		12	2	1	0	1	1	1	2	0	0	5	5	19	1	1	13	41	50	4	6	0	1	1	3	0	2	0	0	3	13	40
cfa-Mir-92-P1b-5pS	STAR	nucleotide difference	15	cfa-Mir-92-P1b	15		0		0		0		0		0		0		0	0	0	0	0	0	0	0	0	0	0	0	0	0	0	0	0	0	0	0	0	0	0	0	0	0	0	0	0	0	1
cfa-Mir-92-P1c-5pS	STAR		668	cfa-Mir-92-P1c	668		0		0		0		0		0		0		3	0	0	0	0	0	6	28	0	19	28	35	0	0	0	0	0	395	0	0	0	0	0	1	0	0	0	0	0	59	0
cfa-Mir-92-P2a-3p	MATURE		0	cfa-Mir-92-P2a	0		0		0		0		0		0		0		0	0	0	0	0	0	0	0	0	0	0	0	0	0	0	0	0	0	0	0	0	0	0	0	0	0	0	0	0	0	0
cfa-Mir-92-P2a-5pS	STAR		0	cfa-Mir-92-P2a	0		0		0		0		0		0		0		0	0	0	0	0	0	0	0	0	0	0	0	0	0	0	0	0	0	0	0	0	0	0	0	0	0	0	0	0	0	0
cfa-Mir-92-P2b-5pS	STAR		92	cfa-Mir-92-P2b	92		0		0		0		0		0		0		0	0	0	0	0	0	0	0	0	0	0	1	1	0	0	1	0	9	0	0	0	0	0	0	0	0	0	0	2	0	0
cfa-Mir-935-v1-3p	MATURE		4620	cfa-Mir-935-v1	4620		0		0		0		0		0		0		0	0	0	0	0	0	36	170	28	290	66	222	0	0	0	0	0	3428	0	0	0	0	0	0	0	0	0	0	0	370	0
cfa-Mir-935-v1-5pS	STAR		2.5	cfa-Mir-935-v1	2.5		0		0		0		0		0		0		0	0	0	0	0	0	0	0	0	0	0	0.5	0	0	0	0	0	2	0	0	0	0	0	0	0	0	0	0	0	0	0
cfa-Mir-935-v2-3p	MATURE		4620	cfa-Mir-935-v2	4620		0		0		0		0		0		0		0	0	0	0	0	0	36	170	28	290	66	222	0	0	0	0	0	3428	0	0	0	0	0	0	0	0	0	0	0	370	0
cfa-Mir-935-v2-5pS	STAR		2.5	cfa-Mir-935-v2	2.5		0		0		0		0		0		0		0	0	0	0	0	0	0	0	0	0	0	0.5	0	0	0	0	0	2	0	0	0	0	0	0	0	0	0	0	0	0	0
cfa-Mir-95-P1-5pS	STAR		6.5	cfa-Mir-95-P1	6.5		0		0		0		0		0		0		0	0	0	0	0	0	0	0	0	0	0	1	0	0	0	0	0	4.5	0	0	0	0	0	1	0	0	0	0	0	0	0
cfa-Mir-95-P2-3p	MATURE		40328	cfa-Mir-95-P2	40328		0		0		0		0		0		0		29	39	42	40	66	53	304	1031	536	420	771	1689	506	44	116	490	633	16630	18	230	49	49	49	421	30	181	13	113	66	4763	759
cfa-Mir-95-P2-5pS	STAR		237.5	cfa-Mir-95-P2	237.5		0		0		0		0		0		0		0	0	2	0	0	1	1	2	3	2	1	21	1	0	2	0	4	153.5	0	0	0	0	0	2	0	3	0	0	3	21	0
cfa-Mir-95-P3-v1-3p	MATURE		145	cfa-Mir-95-P3-v1	145		0		0		0		0		0		0		0	0	0	0	0	0	1	0	2	2	1	8	0	0	0	1	0	56	0	0	0	0	0	0	0	2	0	0	2	11	2
cfa-Mir-95-P3-v1-5pS	STAR	nucleotide difference	116	cfa-Mir-95-P3-v1	116		0		0		0		0		0		0		0	0	0	0	0	0	0	0.5	0.5	4	1	2	0	0	0	0	1	74	0	0	0	0	0	0	0	0	0	0	0	5.5	0
cfa-Mir-95-P3-v2-3p	MATURE		49	cfa-Mir-95-P3-v2	49		0		0		0		0		0		0		0	0	0	0	0	0	0	0	0	0	1	2	0	0	0	0	0	20	0	0	0	0	0	0	0	0	0	0	0	1	0
cfa-Mir-95-P3-v2-5pS	STAR	nucleotide difference	17	cfa-Mir-95-P3-v2	17		0		0		0		0		0		0		0	0	0	0	0	0	0	0.5	0.5	0	0	1	0	0	0	0	0	7	0	0	0	0	0	0	0	0	0	0	0	1.5	0
cfa-Mir-95-P4-3p	MATURE		2004	cfa-Mir-95-P4	2004		0		0		0		0		0		0		0	0	0	0	0	0	18	29	14	57	37	66	0	0	0	0	0	1305	0	0	0	0	0	0	0	0	0	0	0	416	0
cfa-Mir-95-P4-5pS	STAR		534	cfa-Mir-95-P4	534		0		0		0		0		0		0		0	0	0	0	0	0	4	13	10	17	11	10	0	0	0	0	0	384	0	0	0	0	0	0	0	0	0	0	0	76	0
cfa-Mir-96-P1-3pS	STAR		16	cfa-Mir-96-P1	16		0		0		0		0		0		0		0	0	0	0	0	0	0	0	0	0	0	0	0	0	0	0	0	1	0	0	0	0	0	0	0	0	0	0	0	0	0
cfa-Mir-96-P3-v1-3pS	STAR		276	cfa-Mir-96-P3-v1	276		0		0		0		0		0		0		0	0	0	0	0	0	1	66.5	0	1	8	3.5	3.5	1	1	2	15.5	39.5	0	1.5	0	0	0	0	0	0	0	0	0	23	6.5
cfa-Mir-96-P3-v2-3pS	STAR		75	cfa-Mir-96-P3-v2	75		0		0		0		0		0		0		0	0	0	0	0	0	0	18.5	0	0	1	0.5	2.5	0	0	0	3.5	16.5	0	1.5	0	0	0	0	0	0	0	0	0	5	1.5
cfa-Mir-9851-3p	MATURE	nucleotide difference	607	cfa-Mir-9851	607		0		0		0		0		0		0		0	0	0	0	0	0	0	1	1	4	4	52	0	0	0	1	2	432	0	0	0	0	0	0	0	0	0	0	0	67	0
cfa-Mir-9851-5pS	STAR	nucleotide difference	10	cfa-Mir-9851	10		0		0		0		0		0		0		0	0	0	0	0	0	0	0	0	0	0	0	0	0	0	0	0	6	0	0	0	0	0	0	0	0	0	0	0	1	0
cfa-Novel-1-3p	MATURE	NOT IN HUMAN	5	cfa-Novel-1	5		0		0		0		0		0		0		0	0	0	0	0	0	0	0	0	0	0	0	0	0	0	0	0	2	0	0	0	0	0	0	0	0	0	0	1	0	0
cfa-Novel-1-5pS	STAR	NOT IN HUMAN	9	cfa-Novel-1	9		0		0		0		0		0		0		1	0	0	0	0	0	0	1	0	0	0	0	0	0	0	0	0	6	0	0	0	0	0	0	0	0	0	0	0	1	0
cfa-Novel-10-3p	MATURE	NOT IN HUMAN	6582	cfa-Novel-10	6582		0		0		0		0		0		0		2753	4	1	1	1	3	43	143	26	71	32	80	17	1	3	16	20	2308	1	5	2	9	5	16	0	4	0	3	6	241	24
cfa-Novel-10-5pS	STAR	NOT IN HUMAN	618	cfa-Novel-10	618		0		0		0		0		0		0		14	0	2	0	0	0	10	38	5	25	22	6	6	0	0	0	2	217	0	1	0	1	0	2	1	1	1	0	1	41	5
cfa-Novel-11-3p	MATURE	NOT IN HUMAN	97	cfa-Novel-11	97		0		0		0		0		0		0		18	0	0	0	0	0	0	5	0	3	2	1	0	0	0	0	0	51	0	1	0	0	0	1	0	0	0	0	0	4	0
cfa-Novel-11-5pS	STAR	NOT IN HUMAN	17	cfa-Novel-11	17		0		0		0		0		0		0		0	0	0	0	0	1	0	1	0	0	0	1	0	0	0	0	0	10	0	0	0	0	0	0	0	0	0	0	2	2	0
cfa-Novel-12-5pS	STAR	NOT IN HUMAN	63	cfa-Novel-12	63		0		0		0		0		0		0		6	0	1	0	0	0	0	2	0	0	0	0	1	1	0	0	0	8	0	4	0	0	0	0	0	0	0	0	0	1	2
cfa-Novel-13-5p	MATURE	NOT IN HUMAN	647	cfa-Novel-13	647		0		0		0		0		0		0		393	1	0	0	0	0	0	13	6	5	8	9	3	1	1	4	3	55	0	2	1	0	2	5	0	1	0	2	3	10	9
cfa-Novel-13-3pS	STAR	NOT IN HUMAN	56	cfa-Novel-13	56		0		0		0		0		0		0		0	0	0	0	0	0	1	2	0	1	3	0	1	0	0	2	3	4	0	1	0	0	1	0	0	1	0	1	1	3	1
cfa-Novel-14-3p	MATURE	NOT IN HUMAN	48	cfa-Novel-14	48		0		0		0		0		0		0		0	0	0	0	0	0	0	0	0	0	0	0	0	0	0	1	0	11	0	0	0	0	0	0	0	0	0	0	1	1	0
cfa-Novel-14-5pS	STAR	NOT IN HUMAN	105	cfa-Novel-14	105		0		0		0		0		0		0		0	0	0	0	0	0	2	2	1	4	0	0	0	0	0	1	1	51	0	1	0	0	0	1	0	0	0	0	0	11	4
cfa-Novel-15-3p	MATURE	NOT IN HUMAN	64	cfa-Novel-15	64		0		0		0		0		0		0		0	0	0	0	0	0	0	0	1	0	0	6	1	0	1	0	0	24	0	0	0	0	0	1	0	0	0	0	0	9	2
cfa-Novel-15-5pS	STAR	NOT IN HUMAN	74	cfa-Novel-15	74		0		0		0		0		0		0		0	0	0	0	0	0	0	0	1	1	0	2	0	0	0	2	1	17	0	1	0	1	0	2	0	1	0	1	6	3	0
cfa-Novel-16-5p	MATURE	NOT IN HUMAN	0	cfa-Novel-16	0		0		0		0		0		0		0		0	0	0	0	0	0	0	0	0	0	0	0	0	0	0	0	0	0	0	0	0	0	0	0	0	0	0	0	0	0	0
cfa-Novel-16-3p	MATURE	NOT IN HUMAN	4	cfa-Novel-16	4		0		0		0		0		0		0		1	0	0	0	0	0	0	0	0	0	0	0	0	0	0	0	0	1	0	0	0	0	0	0	0	0	0	0	1	0	0
cfa-Novel-17-3p	MATURE	NOT IN HUMAN	309	cfa-Novel-17	309		0		0		0		0		0		0		0	0	0	0	0	0	0	1	1	1	0	5	18	2	2	13	25	22	7	13	1	0	1	7	1	2	0	0	0	10	22
cfa-Novel-17-5pS	STAR	NOT IN HUMAN	103	cfa-Novel-17	103		0		0		0		0		0		0		0	0	0	0	0	0	0	0	0	1	0	7	3	0	0	2	1	19	0	1	0	1	0	2	0	0	1	0	1	4	2
cfa-Novel-18-5p	MATURE	NOT IN HUMAN	26	cfa-Novel-18	26		0		0		0		0		0		0		0	0	0	0	0	0	1	0	3	0	0	4	0	0	0	0	0	6	0	0	0	0	0	0	0	0	0	0	0	10	0
cfa-Novel-18-3p	MATURE	NOT IN HUMAN	18	cfa-Novel-18	18		0		0		0		0		0		0		0	0	0	0	0	0	0	0	2	0	0	5	0	0	0	0	0	0	0	0	0	0	0	0	0	0	0	0	2	5	0
cfa-Novel-2-5p	MATURE	NOT IN HUMAN	624	cfa-Novel-2	624		0		0		0		0		0		0		90	0	0	0	0	0	4	23	7	10	8	16	8	0	2	5	4	269	0	0	1	0	0	8	0	2	3	5	2	39	5
cfa-Novel-2-3pS	STAR	NOT IN HUMAN	204	cfa-Novel-2	204		0		0		0		0		0		0		0	0	0	0	0	0	2	7	1	4	3	3	2	1	1	0	2	126	0	1	0	0	0	1	0	2	1	0	0	18	1
cfa-Novel-21-5p	MATURE	NOT IN HUMAN	362	cfa-Novel-21	362		0		0		0		0		0		0		0	0	0	0	1	0	1	2	0	1	0	1	0	0	1	1	8	22	1	3	1	0	0	0	0	0	0	0	0	11	2
cfa-Novel-21-3pS	STAR	NOT IN HUMAN	102	cfa-Novel-21	102		0		0		0		0		0		0		0	0	0	0	0	0	1	4	0	0	6	1	0	1	0	0	4	11	0	0	0	0	0	0	0	0	0	0	0	18	1
cfa-Novel-22-5p	MATURE	NOT IN HUMAN	239	cfa-Novel-22	239		0		0		0		0		0		0		0	1	0	0	1	0	2	4	1	2	3	7	4	0	0	16	4	32	0	3	0	0	2	11	1	0	0	0	0	2	13
cfa-Novel-22-3p	MATURE	NOT IN HUMAN	144	cfa-Novel-22	144		0		0		0		0		0		0		12	0	0	0	0	0	0	1	0	0	1	3	4	0	1	3	3	23	2	4	0	0	0	3	0	0	0	0	1	7	3
cfa-Novel-23-5pS	STAR	NOT IN HUMAN	27	cfa-Novel-23	27		0		0		0		0		0		0		0	0	0	0	0	0	0	0	1	0	1	1	0	0	0	0	0	3	0	0	0	0	0	0	0	0	0	0	0	0	1
cfa-Novel-24-3p	MATURE	NOT IN HUMAN	6	cfa-Novel-24	6		0		0		0		0		0		0		0	0	0	0	0	0	0	0	0	0	0	0	0	0	0	0	0	1	0	0	0	0	0	0	0	0	0	0	0	0	0
cfa-Novel-24-5pS	STAR	NOT IN HUMAN	39	cfa-Novel-24	39		0		0		0		0		0		0		0	0	0	0	0	0	0	0	0	0	0	1	0	0	0	0	1	5	0	0	0	0	0	1	0	0	0	0	0	1	0
cfa-Novel-3-3p	MATURE	NOT IN HUMAN	4	cfa-Novel-3	4		0		0		0		0		0		0		1	0	0	0	0	0	1	0	0	0	0	0	0	0	0	0	0	0	0	0	0	0	0	1	0	0	0	0	0	0	0
cfa-Novel-3-5pS	STAR	NOT IN HUMAN	3	cfa-Novel-3	3		0		0		0		0		0		0		0	0	0	0	0	0	0	0	0	0	0	0	0	0	0	0	1	0	0	0	0	0	0	0	0	0	0	0	0	0	0
cfa-Novel-4-5p	MATURE	NOT IN HUMAN	249	cfa-Novel-4	249		0		0		0		0		0		0		0	0	0	0	0	0	2	25	2	17	9	2	0	0	0	0	0	181	0	0	0	0	0	0	1	1	0	0	0	8	0
cfa-Novel-4-3p	MATURE	NOT IN HUMAN	42	cfa-Novel-4	42		0		0		0		0		0		0		0	0	0	0	0	0	0	2	0	2	0	0	0	0	0	0	0	33	0	0	0	0	0	0	0	0	0	0	0	4	0
cfa-Novel-5-5p	MATURE	NOT IN HUMAN	1222	cfa-Novel-5	1222		0		0		0		0		0		0		4	2	0	0	0	0	13	33	11	21	14	30	6	1	3	8	4	356	1	8	0	1	1	25	1	11	2	4	24	61	9
cfa-Novel-5-3p	MATURE	NOT IN HUMAN	20	cfa-Novel-5	20		0		0		0		0		0		0		0	0	0	0	0	0	0	0	0	0	0	1	0	0	0	0	0	8	0	0	0	0	0	0	0	0	0	0	0	3	0
cfa-Novel-6-5p	MATURE	NOT IN HUMAN	46	cfa-Novel-6	46		0		0		0		0		0		0		21	0	0	0	0	0	0	2	0	0	0	1	0	0	0	1	1	14	0	0	0	0	0	0	0	0	0	0	0	1	0
cfa-Novel-7-5p	MATURE	NOT IN HUMAN	283	cfa-Novel-7	283		0		0		0		0		0		0		5	0	0	0	0	0	0	15	7	12	5	12	1	0	0	2	2	91	0	0	0	0	0	7	0	0	2	3	2	13	1
cfa-Novel-7-3p	MATURE	NOT IN HUMAN	26	cfa-Novel-7	26		0		0		0		0		0		0		18	0	0	0	0	0	0	0	0	0	0	0	0	0	0	0	0	2	0	0	0	0	0	0	0	0	0	0	0	1	0
cfa-Novel-8-5p	MATURE	NOT IN HUMAN	0	cfa-Novel-8	0		0		0		0		0		0		0		0	0	0	0	0	0	0	0	0	0	0	0	0	0	0	0	0	0	0	0	0	0	0	0	0	0	0	0	0	0	0
cfa-Novel-8-3p	MATURE	NOT IN HUMAN	17	cfa-Novel-8	17		0		0		0		0		0		0		0	0	0	0	0	0	0	0	0	1	0	0	0	0	0	0	1	9	0	0	0	0	0	0	0	0	1	0	0	1	0
cfa-Novel-9-5p	MATURE	NOT IN HUMAN	4	cfa-Novel-9	4		0		0		0		0		0		0		0	0	0	0	0	0	0	0	0	0	0	0	0	0	0	0	0	4	0	0	0	0	0	0	0	0	0	0	0	0	0
cfa-Novel-9-3p	MATURE	NOT IN HUMAN	42	cfa-Novel-9	42		0		0		0		0		0		0		29	0	0	0	0	0	0	0	0	0	0	0	0	0	0	1	0	7	0	0	0	0	0	1	0	0	0	0	0	0	0
							ACA		AMU		ALI		HS1		HS2		TOTAL
					total reads		24		40		172		4677.5		13255.3		18168.8
					mature reads		19		35		151		4544		12892		17641
					star reads		5		5		21		133.5		363.333		527.833
					distinct microRNAs		12		15		36		241		276		330
					distinct matures		9		11		25		180		206		232
					distinct stars		3		4		11		61		70		98
					polymorphic microRNAs		0		0		0		0		0		0
					polymorphic mature		0		0		0		0		0		0
					polymorphic stars		0		0		0		0		0		0
					canid specific microRNAs		0		2		4		9		8		16
					canid specific matures		0		1		1		7		7		11
					canid specific stars		0		1		3		2		1		5
[truncated: 152 more columns]
