# Supplementary material
Source: HighWire-hosted journal article supplement (doi:10.1101/rna.078410.120)
Supplement: Supplemental_Table_1.xlsx [file Supplemental_Table_1.xlsx]

## Sheet: Supplementary Table 1
	ACA	AMU	ALI	HS1	HS2	TOTAL
total reads	24	40	172	4677.5	13255.3	18168.8
mature reads	19	35	151	4544	12892	17641
star reads	5	5	21	133.5	363.333	527.833
distinct microRNAs	12	15	36	241	276	330
distinct matures	9	11	25	180	206	232
distinct stars	3	4	11	61	70	98
polymorphic microRNAs	0	0	0	0	0	0
polymorphic mature	0	0	0	0	0	0
polymorphic stars	0	0	0	0	0	0
canid specific microRNAs	0	2	4	9	8	16
canid specific matures	0	1	1	7	7	11
canid specific stars	0	1	3	2	1	5
