# Supplementary material
Source: HighWire-hosted journal article supplement (doi:10.1101/rna.078410.120)
Supplement: Supplemental_Table_2.docx [file Supplemental_Table_2.docx]

### Supplementary Table 2a – Summarized gene ontology enrichments of targets of ancient liver specific microRNA

| microRNA | Enriched terms |
| --- | --- |
| Cfa-Mir-122_5p | Carbohydrate metabolism (GO:0005996, 0005975, 0019318, …)  Response to Starvation (GO:0042594, 0042149, 0009267)  Growth factors (GO:1990090, 1990089, 0070848, …) |
| Transcriptional regulation (GO:0000978, 0001067, 0000977, …) |
| Cfa-Mir-339_5p | Estrogen and androgen metabolism (GO:0006703, 0008209, 0008210, …)  Fatty acid and CoA biosynthesis (GO:0046949, 0035337, 0035384, …) |
| Enzymatic activity (GO:0047025, 0047035, 0003857, …) |
| Cfa-Mir-423_3p | Protein deglycosylation (GO:1904380, 0036507, 0036508, …)  Misfolded protein reaction (GO:0071712, 0071218, 0051788, …) |
| Transcriptional regulation (GO:0043565, 0003682, 1990837, …) |
| Hippo signaling pathway (hsa04390) |

### Supplementary Table 2b – Summarized gene ontology enrichments of targets of ancient muscle specific microRNA

| microRNA | Enriched terms |
| --- | --- |
| Cfa-Mir-155_5p | Regulation of transcription (GO:1903506, 0006355, 2001141, …)  Protein modification (GO:0006464, 0036211) |
| Transcriptional regulation (GO:0003690, 0000977, 0001012, …) |
| Acute myeloid leukemia (hsa05221)  Osteoclast differentiation (hsa04380) |
| Cfa-Mir-378_3p  (also high in liver) | Regulation of signaling (GO:0043405, 0010646, 0007267, …)  Protein modification (GO:0006464, 0036211)  Regulation of cardiac muscle / cardiocytes (GO:2000726, 1905208) |
| Transcriptional regulation (GO:0044212, 0001067, 0043565, …) |
| Cfa-Mir-10-P3b_5p | Carbohydrate and fat metabolism (GO:0009311, 0009313, 0006665, …)  Epithelium / cell polarity related (GO:0001738, 0001736, 0007164, …)  Regulation of hematopoietic cell types (GO:1901532, GO:1902036, 0060218) |
| Transcriptional regulation (GO:0000987, 0000977, 0001012, …)  Enzymatic activity (GO:0004308, 0016997, 0052794, …) |
| Cfa-Mir-133_3p | Transcriptional regulation (GO:1903508, 1902680, 0051254, …)  Regulation of actin filament-based process (GO:0032970)  Neurotransmitter / Synapse (GO:0007269, 0099643) |
| Divalent inorganic cation transmembrane transporter activity (GO:0072509)  Cell adhesion (GO:0050839)  GABA receptor binding (GO:0050811) |
| Synaptic vesicle cycle (hsa04721) |

### Supplementary Table 2c – Summarized gene ontology enrichments of targets of ancient cartilage specific microRNA

| microRNA | Enriched terms |
| --- | --- |
| Cfa-Mir-205-P1_5p | Regulation of signaling (GO:0023051,0010646, 0023056, …) |
| Transcriptional regulation (GO:1990837, 0003690, 0043565, …)  Enzyme activity (GO:0004308, 0016997, 0052794, …)  Platelet-derived growth factor receptor (GO:0005161) |
| Hippo signaling pathway (hsa04390, hsa04392) |
| Cfa-Let-7-P2b2_5p | Transcriptional regulation (GO:0006357, 0006366)  Appendage and limp development (GO:0030326, 0035113, 0035107, …) |
| Transcriptional regulation (GO:0003700, 0000981,0140110, …)  Post-transcriptional regulation (GO:0030371, 0000900)  CCR1 chemokine receptor binding (GO:0031726) |
| Cancer (hsa05206, hsa05205, hsa05214) |
| Cfa-Mir-1-P3_3p | Chromatin modification (GO:0018027, 0051567, 0016570, …) |
| Chromatin modification (GO:0046974, 0046976, 0018024, …)  Transcriptional regulation (GO:1990841, 0070742, 0140110, …)  Cytoskeletal protein binding (GO:0008092) |
| Cfa-Mir-423_3p and Cfa-Mir-155_5p see Table 2a & Table 2b | |

### Supplementary Table 2d – Summarized gene ontology enrichments of targets of historic skin specific microRNA

| microRNA | Enriched terms |
| --- | --- |
| Cfa-Mir-203-v1_3p  (Cfa-Mir-203-v2_3p is similar) | Response to stimulus (GO:0071495, 0009719)  Epithelium and blood vessel development (GO:0060429, 0001568)  Positive regulation of smooth muscle cell migration (GO:0014911)  Cell death (GO:0008219, 0012501, 0006915) |
| Transcriptional regulation (GO:0070888, 0000981, 0003700, …)  Growth factor receptors (GO:0008083, 0030618) |
| Synapse (hsa04727)  Growth factor (hsa04350, hsa04935, hsa01521) |
| Cfa-Mir-146-P2_5p | Ectodermal development (GO:0007439, 0048611, 0010668, …)  Transcriptional regulation (GO:0051254, 0045893, 1903508, …)  Appendage and limp development (GO:0030326, 0035113) |
| Transcriptional regulation (GO:0001228, 0140110, 0003700, …)  Synapses (GO:0000149, 0019905) |
| Cfa-Mir-27-P1_3p | Protein modification (GO:0006464, 0036211) |
| Transcriptional regulation (GO:0001228, 0140110, 0003700)  Ion binding (GO:0043167, 0046872, 0043169) |
| Cfa-Mir-205-P1_5p and Cfa-Mir-378_3p see Table 2c & Table 2b | |
