# Supplementary material
Source: HighWire-hosted journal article supplement (doi:10.1101/rna.078410.120)
Supplement: Supplemental_Table_Figure_Legends.docx [file Supplemental_Table_Figure_Legends.docx]

**Supplementary Table and Figure legends**

### **Supplementary Table 1** Summarized normalized read counts of distinct microRNA groups for ancient and historic samples derived from Supplementary File 4.

### **Supplementary Table 2a** Summarized gene ontology enrichments of targets of ancient liver specific microRNA

### **Supplementary Table 2b** Summarized gene ontology enrichments of targets of ancient muscle specific microRNA

### **Supplementary Table 2c** Summarized gene ontology enrichments of targets of ancient cartilage specific microRNA

**Supplementary Table 2d**  Summarized gene ontology enrichments of targets of historic skin specific microRNA

**Supplementary Figures**:

**Supplementary Figure 1:** Conserved microRNAs that are taxonomically informative because they are either A) not found in human or B) found in human and showing nucleotide differences to at least one other MirGeneDB organism or human, respectively (‘polymorphic microRNAs’). Canid / dog microRNAs (*Canis familiaris,* Cfa*)* are highlighted in red boxes, human microRNAs (*Homo sapiens,* Hsa*)* in blue, respectively. Other abbreviations from MirGeneDB (Mml - Rhesus monkey (*Macaca mulatta*), Mmu - House mouse (*Mus musculus*), Rno - Norway rat (*Rattus norvegicus*), Cpo - Guinea pig (*Cavia porcellus*), Ocu - Rabbit (*Oryctolagus cuniculus*), Bta - Cow (*Bos taurus*), Dno - Nine-banded armadillo (*Dasypus novemcinctus*), Ete - Lesser hedgehog tenrec (*Echinops telfairi*), Sha - Tasmanian devil (*Sarcophilus harrisii*), Mdo - Gray short-tailed opossum (*Monodelphis domestica*), Ona - Platypus (*Ornithorhynchus anatinus*), Gga - Chicken (*Gallus gallus*), Cli - Rock pigeon (*Columba livia*), Tgu - Zebra finch (*Taeniopygia guttata*), Ami - American alligator (*Alligator mississippiensis*), Cpi - Western painted turtle (*Chrysemys picta bellii*), Aca - Green anole lizard (*Anolis carolinensis*), Xtr - Tropical clawed frog (*Xenopus tropicalis*), Dre - Zebrafish (*Danio rerio*), Sto - Cloudy Catshark (*Scyliorhinus torazame*)).

**Supplementary Figure 2:** The current MirGeneDB annotation of canid-specific microRNAs (MirGeneDB 2.0, (Fromm et al. 2020)) detected in ancient and historic samples is supported by the comparative genomics analyses in other Carnivora. Using BLAT Mir-1838 and Mir-Novel-6 were only detected in canids, supporting canid-specificity of these two genes. Only canids show perfect hits (green) of the other “canid-specific” microRNAs, while most Caniformia show hits for the other precursor sequences with several substitutions (light green). The absence of any hits in Felidae clearly supports a Caniform origin, but not a Carnivora-specificity, substantially limiting the possibility of non-canid origin of the detected sequences in the ancient and historic samples, and hence, supporting the authenticity of the samples and data.

**Supplementary Figure 3:** Cell type- and Tissue-Specificity of selected microRNAs across 66 modern, 3 ancient and 2 historic samples. The UMAP from Figure 2 was re-used to depict the color-coded detection of 15 selected microRNAs (Let-7-P2b2: ubiquitous, Mir-1: myoMir, Mir-10-P3b: ubiquitous & mast-cells, Mir-24-P1:Macrophages, Mir-27: epithelial cells, Mir-122: hepatocytes, Mir-133:myoMir, Mir-146-P2: dendritic cells, Mir-148-P1: Mast-cells, Mir-155: Lymphocytes, Mir-203: epithelial cells / skin, Mir-205: epithelial cells / skin, Mir-339: Macrophages, Mir-378: Dendritic cells, Mir-423: platelets, RBC, lymphocytes).

**Supplementary File 1:** miRTrace report on ancient canids.

**Supplementary File 2:** miRTrace report on historic barley from Smith et al 2017.

**Supplementary File 3:** miRTrace report on historic human from Shaw et al 2019.

**Supplementary File 4:** comprehensive count-matrix of all canid microRNAs in ancient and historic samples and from the dog-tissue atlas, including rank level and denomination whether similar or identical sequences are found in human and could possibly originate from contamination.

**Supplementary File 5:** miRTrace report on recent dog tissue-atlas samples.
